# Supplementary material for: Health effects associated with chewing tobacco: a Burden of Proof study
Source: PubMed Central journal article supplement (PMC10844244; doi:10.1038/s41467-024-45074-9), 2024-02-05
Supplement: 41467_2024_45074_MOESM1_ESM.pdf [file 41467_2024_45074_MOESM1_ESM.pdf]

# Supplementary Information for “Health effects associated with chewing tobacco: a Burden of Proof study”

This appendix provides detailed information on input data sources and supplementary results for the publication titled “Health effects associated with chewing tobacco: a Burden of Proof study.”

## Table of Contents

|                                                                                                            |    |
|------------------------------------------------------------------------------------------------------------|----|
| Section 1: Data source identification and assessment .....                                                 | 3  |
| Section 1.1: Literature searches.....                                                                      | 3  |
| Section 1.1.1: PubMed Search Strings .....                                                                 | 3  |
| Section 1.1.2: Web of Science Search Strings .....                                                         | 6  |
| Section 1.1.3: Global Index Medicus Search Strings .....                                                   | 8  |
| Section 1.2: Inclusion and Exclusion Criteria .....                                                        | 11 |
| Section 1.3: Outcome Definitions .....                                                                     | 11 |
| Table S1: Definitions of seven included outcomes .....                                                     | 11 |
| Section 1.4: Exposure Definition.....                                                                      | 12 |
| Table S2: Local smokeless tobacco products categorized as chewing tobacco.....                             | 12 |
| Section 1.5: Data Extraction.....                                                                          | 13 |
| Table S3: Data Extraction Template.....                                                                    | 13 |
| Section 2: Data Inputs.....                                                                                | 19 |
| Section 2.1: Study Characteristics.....                                                                    | 20 |
| Table S4: Summary of Study Metadata and Characteristics.....                                               | 20 |
| Section 2.2: Effect Size Data Details.....                                                                 | 36 |
| Table S5: Summary of Data Inputs.....                                                                      | 37 |
| Section 3: Supplementary Methods .....                                                                     | 50 |
| Section 3.1: Umbrella review .....                                                                         | 50 |
| Section 3.1.1: PubMed Umbrella Review Search String .....                                                  | 50 |
| Table S6: Outcome groupings of MA/SRs identified in the umbrella review .....                              | 51 |
| Section 3.2: The Scope of the Systematic Literature Reviews .....                                          | 51 |
| Table S7: Data inputs for the relative risks of chewing tobacco use .....                                  | 52 |
| Section 3.3: Study Quality and Bias Assessment .....                                                       | 53 |
| Table S8: Setting up the bias covariates to evaluate the level of adjustment of included data points ..... | 53 |
| Table S9: Bias Characteristics for Included Observations.....                                              | 55 |

|                                                                                                                     |    |
|---------------------------------------------------------------------------------------------------------------------|----|
| Table S10: Bias Covariates eligible for testing for each health outcome .....                                       | 68 |
| Section 3.4: Detailed methods for estimating the relative risk of 8 health outcomes .....                           | 69 |
| Table S11: MR-BRT model specifications by risk-outcome pair .....                                                   | 70 |
| Section 3.5: Quantifying between-study heterogeneity .....                                                          | 70 |
| Table S12: Gamma solution for each risk-outcome pair quantifying between-study heterogeneity                        | 70 |
| Section 4: Sensitivity Analyses .....                                                                               | 70 |
| Section 4.1: Sensitivity analyses for the relationship between chewing tobacco and stroke .....                     | 72 |
| Table S13: Results of sensitivity analyses for chewing tobacco and stroke .....                                     | 72 |
| Section 4.2: Sensitivity analyses for the relationship between chewing tobacco and ischemic heart disease .....     | 73 |
| Table S14: Results of sensitivity analyses for chewing tobacco and ischemic heart disease .....                     | 73 |
| Section 4.3: Sensitivity analyses for the relationship between chewing tobacco and esophageal cancer .....          | 74 |
| Table S15: Results of sensitivity analyses for chewing tobacco and esophageal cancer .....                          | 74 |
| Section 4.4: Sensitivity analyses for the relationship between chewing tobacco and lip and oral cavity cancer ..... | 77 |
| Table S16: Results of sensitivity analyses for chewing tobacco and lip and oral cavity cancer .....                 | 77 |
| Section 4.5: Sensitivity analyses for the relationship between chewing tobacco and laryngeal cancer                 | 80 |
| Table S17: Results of sensitivity analyses for chewing tobacco and laryngeal cancer .....                           | 80 |
| Section 4.6: Sensitivity analyses for the relationship between chewing tobacco and nasopharynx cancer .....         | 82 |
| Table S18: Results of sensitivity analyses for chewing tobacco and nasopharynx cancer .....                         | 82 |
| Section 4.7: Sensitivity analyses for the relationship between chewing tobacco and other pharynx cancer .....       | 84 |
| Table S19: Results of sensitivity analyses for chewing tobacco and other pharynx cancer .....                       | 84 |
| Section 4.8: Study characteristics and observations for sex-specific sensitivity analyses .....                     | 87 |
| Table S20: Study characteristics for male-specific sensitivity analysis .....                                       | 87 |
| Table S21: Study characteristics for female-specific sensitivity analysis .....                                     | 88 |
| Table S22: Additional data inputs for sex-specific sensitivity analyses .....                                       | 88 |
| Section 5: GATHER and PRISMA checklists .....                                                                       | 90 |
| Section 5.1: PRISMA .....                                                                                           | 90 |
| Table S23: PRISMA 2020 Abstract Checklist .....                                                                     | 90 |
| Table S24: PRISMA 2020 Manuscript Checklist .....                                                                   | 91 |
| Figure S1. PRISMA 2020 flow diagram for chewing tobacco and head and neck cancers .....                             | 94 |

|                                                                                         |    |
|-----------------------------------------------------------------------------------------|----|
| Figure S2. PRISMA 2020 flow diagram for chewing tobacco and ischemic heart disease..... | 95 |
| Figure S3. PRISMA 2020 flow diagram for chewing tobacco and stroke.....                 | 96 |
| Section 5.2: GATHER .....                                                               | 97 |
| Table S25: GATHER Checklist .....                                                       | 97 |
| Section 6: Supplementary References.....                                                | 98 |

## **Section 1: Data source identification and assessment**

Data for the present analysis was identified through three systematic reviews for our seven health outcomes of interest. Each data source underwent a minimum of two independent screenings and evaluated on the basis of pre-established inclusion and exclusion criteria described below.

### *Section 1.1: Literature searches*

We conducted three systematic reviews for head and neck cancers, ischemic heart disease, and stroke, respectively. These reviews encompassed three databases: PubMed, Web of Science, and Global Index Medicus. These databases were selected to cover a broad swath of peer-reviewed global and regional literature. The search strings were last run on February 15, 2023 to capture all studies, irrespective of publication language, published from January 1, 1970 through January 30, 2023.

#### **Section 1.1.1: PubMed Search Strings**

##### *Head and Neck Cancers*

("smokeless tobacco"[ Title/Abstract] OR "Tobacco, Smokeless"[MeSH Terms] OR bazaar[Title/Abstract] OR ("betel quid"[ Title/Abstract] AND tobacco[Title/Abstract]) OR "chewing tobacco"[ Title/Abstract] OR chimó[Title/Abstract] OR snuff[Title/Abstract] OR snuif[Title/Abstract] OR dip[Title/Abstract] OR dohra[Title/Abstract] OR gudakhu[Title/Abstract] OR gul[Title/Abstract] OR gutka[Title/Abstract] OR gutkha[Title/Abstract] OR "hnat hsey"[Title/Abstract] OR iq'mik[Title/Abstract] OR khaini[Title/Abstract] OR kharra[Title/Abstract] OR khiwam[Title/Abstract] OR khimam[Title/Abstract] OR kiwam[Title/Abstract] OR kimam[Title/Abstract] OR "lal dant manjan"[ Title/Abstract] OR ("loose leaf"[ Title/Abstract] AND (chew[Title/Abstract] OR tobacco[Title/Abstract]))) OR mainpuri[Title/Abstract] OR maras[Title/Abstract] OR mawa[Title/Abstract] OR mshri[Title/Abstract] OR naffa[Title/Abstract] OR nas[Supplementary Concept] OR ((nas[Title/Abstract] OR nass[Title/Abstract]) AND tobacco[Title/Abstract]) OR naswar[Title/Abstract] OR nasway[Title/Abstract] OR nasvay[Title/Abstract] OR neffa[Title/Abstract] OR((pan[Title/Abstract] OR paan[Title/Abstract]) AND tobacco[Title/Abstract]) OR (plug[Title/Abstract] AND tobacco[Title/Abstract]) OR (rapé[Title/Abstract] AND tobacco[Title/Abstract]) OR ((red[Title/Abstract] OR tobacco[Title/Abstract]) AND (toothpowder[Title/Abstract] OR toothpaste[Title/Abstract])) OR shammah[Title/Abstract] OR snus[Title/Abstract] OR taaba[Title/Abstract] OR tapkeer[Title/Abstract] OR tawa[Title/Abstract] OR tombol[Title/Abstract] OR toombak[Title/Abstract] OR tuibur[Title/Abstract] OR "tobacco water"[ Title/Abstract] OR (twist[Title/Abstract] AND tobacco[Title/Abstract]) OR zarda[Title/Abstract]) AND

(Head and neck neoplasms[MeSH Terms] OR "head and neck cancers"[Title/Abstract] OR "head and neck neoplasms"[Title/Abstract] OR "pharyngeal cancer"[Title/Abstract] OR "pharyngeal cancers"[Title/Abstract] OR "pharyngeal neoplasm"[Title/Abstract] OR "pharyngeal

neoplasms"[Title/Abstract] OR "pharynx cancer"[Title/Abstract] OR "pharynx cancers"[Title/Abstract] OR "pharynx neoplasm"[Title/Abstract] OR "pharynx neoplasms"[Title/Abstract] OR "cancer of the pharynx"[Title/Abstract] OR "cancers of the pharynx"[Title/Abstract] OR "nasopharyngeal cancer"[Title/Abstract] OR "nasopharyngeal cancers"[Title/Abstract] OR "nasopharyngeal neoplasm"[Title/Abstract] OR "nasopharyngeal neoplasms"[Title/Abstract] OR "nasopharynx cancer"[Title/Abstract] OR "nasopharynx cancers"[Title/Abstract] OR "nasopharynx neoplasm"[Title/Abstract] OR "nasopharynx neoplasms"[Title/Abstract] OR "cancer of the nasopharynx"[Title/Abstract] OR "cancers of the nasopharynx"[Title/Abstract] OR "neoplasm of the nasopharynx"[Title/Abstract] OR "neoplasms of the nasopharynx"[Title/Abstract] OR "mouth cancer"[Title/Abstract] OR "mouth cancers"[Title/Abstract] OR "mouth neoplasm"[Title/Abstract] OR "mouth neoplasms"[Title/Abstract] OR "cancer of mouth"[Title/Abstract] OR "cancer of the mouth"[Title/Abstract] OR "cancers of the mouth"[Title/Abstract] OR "oral cancer"[Title/Abstract] OR "oral cancers"[Title/Abstract] OR "oral neoplasm"[Title/Abstract] OR "oral neoplasms"[Title/Abstract] OR "gingival neoplasm"[Title/Abstract] OR "gingival neoplasms"[Title/Abstract] OR "gingival cancer"[Title/Abstract] OR "gingival cancers"[Title/Abstract] OR "lip neoplasm"[Title/Abstract] OR "lip neoplasms"[Title/Abstract] OR "lip cancer"[Title/Abstract] OR "lip cancers"[Title/Abstract] OR "cancer of the lip"[Title/Abstract] OR "cancers of the lip"[Title/Abstract] OR "tongue neoplasm"[Title/Abstract] OR "tongue neoplasms"[Title/Abstract] OR "tongue cancer"[Title/Abstract] OR "tongue cancers"[Title/Abstract] OR "cancer of the tongue"[Title/Abstract] OR "cancers of the tongue"[Title/Abstract] OR "palatal neoplasm"[Title/Abstract] OR "palatal neoplasms"[Title/Abstract] OR "palatal cancer"[Title/Abstract] OR "palatal cancers"[Title/Abstract] OR "oral cavity cancer"[Title/Abstract] OR "oral cavity cancers"[Title/Abstract] OR "laryngeal cancer"[Title/Abstract] OR "laryngeal cancers"[Title/Abstract] OR "laryngeal neoplasm"[Title/Abstract] OR "laryngeal neoplasms"[Title/Abstract] OR "larynx cancer"[Title/Abstract] OR "larynx cancers"[Title/Abstract] OR "larynx neoplasm"[Title/Abstract] OR "larynx neoplasms"[Title/Abstract] OR "cancer of the larynx"[Title/Abstract] OR "cancers of the larynx"[Title/Abstract] OR "neoplasm of the larynx"[Title/Abstract] OR "neoplasms of the larynx"[Title/Abstract] OR "esophageal cancer"[Title/Abstract] OR "esophageal cancers"[Title/Abstract] OR "esophageal neoplasm"[Title/Abstract] OR "esophageal neoplasms"[Title/Abstract] OR "esophagus cancer"[Title/Abstract] OR "esophagus cancers"[Title/Abstract] OR "esophagus neoplasm"[Title/Abstract] OR "esophagus neoplasms"[Title/Abstract] OR "esophageal squamous cell carcinoma"[Title/Abstract] OR "cancer of the esophagus"[Title/Abstract] OR "cancers of the esophagus"[Title/Abstract] OR "neoplasm of the esophagus"[Title/Abstract] OR "neoplasms of the esophagus"[Title/Abstract] OR "oesophageal cancer"[Title/Abstract] OR "oesophageal cancers"[Title/Abstract] OR "oesophageal neoplasm"[Title/Abstract] OR "oesophageal neoplasms"[Title/Abstract] OR "oesophagus cancer"[Title/Abstract] OR "oesophagus cancers"[Title/Abstract] OR "oesophagus neoplasm"[Title/Abstract] OR "oesophagus neoplasms"[Title/Abstract] OR "oesophageal squamous cell carcinoma"[Title/Abstract] OR "cancer of the oesophagus"[Title/Abstract] OR "cancers of the oesophagus"[Title/Abstract] OR "neoplasm of the oesophagus"[Title/Abstract] OR "neoplasms of the oesophagus"[Title/Abstract] OR "oropharyngeal cancer"[Title/Abstract] OR "oropharyngeal cancers"[Title/Abstract] OR "oropharynx cancer"[Title/Abstract] OR "oropharynx cancers"[Title/Abstract] OR "oropharyngeal neoplasm"[Title/Abstract] OR "oropharyngeal neoplasms"[Title/Abstract] OR "oropharynx neoplasm"[Title/Abstract] OR "cancer of the oropharynx"[Title/Abstract] OR "cancers of the oropharynx"[Title/Abstract] OR "neoplasm of the oropharynx"[Title/Abstract] OR "neoplasms of the oropharynx"[Title/Abstract] OR "hypopharyngeal cancer"[Title/Abstract] OR "hypopharyngeal cancers"[Title/Abstract] OR "hypopharyngeal neoplasm"[Title/Abstract] OR "hypopharyngeal

neoplasms"[Title/Abstract] OR "cancer of the hypopharynx"[Title/Abstract] OR "cancers of the hypopharynx"[Title/Abstract] OR "neoplasm of the hypopharynx"[Title/Abstract] OR "neoplasms of the hypopharynx"[Title/Abstract]) AND

(Risk[MeSH Terms] OR Odds Ratio[MeSH Terms] OR "risk"[Title/Abstract] OR "odds ratio"[Title/Abstract] OR "cross-product ratio"[Title/Abstract] OR "hazards ratio"[Title/Abstract] OR "hazard ratio"[Title/Abstract]) AND ("1970/01/01"[PDat] : "2023/01/30"[PDat]) NOT (animals[MeSH Terms] NOT Humans[MeSH Terms])

### *Ischemic Heart Disease*

("smokeless tobacco"[ Title/Abstract] OR "Tobacco, Smokeless"[MeSH Terms] OR bazaar[Title/Abstract] OR ("betel quid"[ Title/Abstract] AND tobacco[Title/Abstract]) OR "chewing tobacco"[ Title/Abstract] OR chimó[Title/Abstract] OR snuff[Title/Abstract] OR snuif[Title/Abstract] OR dip[Title/Abstract] OR dohra[Title/Abstract] OR gudakhu[Title/Abstract] OR gul[Title/Abstract] OR gutka[Title/Abstract] OR gutkha[Title/Abstract] OR "hnat hsey"[Title/Abstract] OR iq'mik[Title/Abstract] OR khaini[Title/Abstract] OR kharra[Title/Abstract] OR khiwam[Title/Abstract] OR khimam[Title/Abstract] OR kiwam[Title/Abstract] OR kimam[Title/Abstract] OR "lal dant manjan"[ Title/Abstract] OR ("loose leaf"[ Title/Abstract] AND (chew[Title/Abstract] OR tobacco[Title/Abstract]))) OR mainpuri[Title/Abstract] OR maras[Title/Abstract] OR mawa[Title/Abstract] OR mshri[Title/Abstract] OR naffa[Title/Abstract] OR nas[Supplementary Concept] OR ((nas[Title/Abstract] OR nass[Title/Abstract]) AND tobacco[Title/Abstract]) OR naswar[Title/Abstract] OR nasway[Title/Abstract] OR nasvay[Title/Abstract] OR neffa[Title/Abstract] OR((pan[Title/Abstract] OR paan[Title/Abstract]) AND tobacco[Title/Abstract]) OR (plug[Title/Abstract] AND tobacco[Title/Abstract]) OR (rapé[Title/Abstract] AND tobacco[Title/Abstract]) OR ((red[Title/Abstract] OR tobacco[Title/Abstract]) AND (toothpowder[Title/Abstract] OR toothpaste[Title/Abstract])) OR shammah[Title/Abstract] OR snus[Title/Abstract] OR taaba[Title/Abstract] OR tapkeer[Title/Abstract] OR tawa[Title/Abstract] OR tombol[Title/Abstract] OR toombak[Title/Abstract] OR tuibur[Title/Abstract] OR "tobacco water"[ Title/Abstract] OR (twist[Title/Abstract] AND tobacco[Title/Abstract]) OR zarda[Title/Abstract]) AND

("Myocardial Ischemia"[MeSH Terms] OR "heart disease"[Title/Abstract] OR "coronary"[Title/Abstract] OR "myocardial infarction"[Title/Abstract] OR "heart attack"[Title/Abstract] OR "heart disease"[Title/Abstract]) AND

(Risk[MeSH Terms] OR Odds Ratio[MeSH Terms] OR "risk"[Title/Abstract] OR "odds ratio"[Title/Abstract] OR "cross-product ratio"[Title/Abstract] OR "hazards ratio"[Title/Abstract] OR "hazard ratio"[Title/Abstract]) AND ("1970/01/01"[PDat] : "2023/01/30"[PDat]) NOT (animals[MeSH Terms] NOT Humans[MeSH Terms])

### *Stroke*

("smokeless tobacco"[ Title/Abstract] OR "Tobacco, Smokeless"[MeSH Terms] OR bazaar[Title/Abstract] OR ("betel quid"[ Title/Abstract] AND tobacco[Title/Abstract]) OR "chewing tobacco"[ Title/Abstract] OR chimó[Title/Abstract] OR snuff[Title/Abstract] OR snuif[Title/Abstract] OR dip[Title/Abstract] OR dohra[Title/Abstract] OR gudakhu[Title/Abstract] OR gul[Title/Abstract] OR gutka[Title/Abstract] OR gutkha[Title/Abstract] OR "hnat hsey"[Title/Abstract] OR iq'mik[Title/Abstract] OR khaini[Title/Abstract] OR kharra[Title/Abstract] OR khiwam[Title/Abstract] OR khimam[Title/Abstract] OR kiwam[Title/Abstract] OR kimam[Title/Abstract] OR "lal dant manjan"[ Title/Abstract] OR ("loose leaf"[ Title/Abstract] AND (chew[Title/Abstract] OR tobacco[Title/Abstract]))) OR

mainpuri[Title/Abstract] OR maras[Title/Abstract] OR mawa[Title/Abstract] OR mshri[Title/Abstract] OR naffa[Title/Abstract] OR nas[Supplementary Concept] OR ((nas[Title/Abstract] OR nass[Title/Abstract]) AND tobacco[Title/Abstract]) OR naswar[Title/Abstract] OR nasway[Title/Abstract] OR nasvay[Title/Abstract] OR neffa[Title/Abstract] OR((pan[Title/Abstract] OR paan[Title/Abstract]) AND tobacco[Title/Abstract]) OR (plug[Title/Abstract] AND tobacco[Title/Abstract]) OR (rapé[Title/Abstract] AND tobacco[Title/Abstract]) OR ((red[Title/Abstract] OR tobacco[Title/Abstract]) AND (toothpowder[Title/Abstract] OR toothpaste[Title/Abstract])) OR shammah[Title/Abstract] OR snus[Title/Abstract] OR taaba[Title/Abstract] OR tapkeer[Title/Abstract] OR tawa[Title/Abstract] OR tombol[Title/Abstract] OR toombak[Title/Abstract] OR tuibur[Title/Abstract] OR "tobacco water"[ Title/Abstract] OR (twist[Title/Abstract] AND tobacco[Title/Abstract]) OR zarda[Title/Abstract]) AND

("Stroke"[MeSH Terms] OR "stroke"[Title/Abstract] OR "cva"[Title/Abstract] OR "cerebrovascular"[Title/Abstract] OR "hemorrhage"[Title/Abstract] OR "haemorrhage"[Title/Abstract] OR "aneurism"[Title/Abstract] OR "aneurysm"[Title/Abstract]) AND

(Risk[MeSH Terms] OR Odds Ratio[MeSH Terms] OR "risk"[Title/Abstract] OR "odds ratio"[Title/Abstract] OR "cross-product ratio"[Title/Abstract] OR "hazards ratio"[Title/Abstract] OR "hazard ratio"[Title/Abstract]) AND ("1970/01/01"[PDat] : "2023/1/30"[PDat]) NOT (animals[MeSH Terms] NOT Humans[MeSH Terms])

### Section 1.1.2: Web of Science Search Strings

#### *Head and Neck Cancers*

TS=("smokeless tobacco" OR "Tobacco, Smokeless" OR bajjar OR ("betel quid" AND tobacco) OR ("betel quid" NEAR tobacco) OR "chewing tobacco" OR chimó OR snuff OR snuif OR dip OR dohra OR gudakhu OR gul OR gutka OR gutkha OR "hnat hsey" OR iq'mik OR khaini OR kharra OR khiwam OR khimam OR kiwam OR kimam OR "lal dant manjan" OR ("loose leaf" AND (chew OR tobacco)) OR mainpuri OR maras OR mawa OR mshri OR naffa OR nas OR ((nas OR nass) AND tobacco) OR naswar OR nasway OR nasvay OR neffa OR ((pan OR paan) AND tobacco) OR (plug AND tobacco) OR (rapé AND tobacco) OR ((red OR tobacco) AND (toothpowder OR toothpaste)) OR shammah OR snus OR taaba OR tapkeer OR tawa OR tombol OR toombak OR tuibur OR "tobacco water" OR (twist AND tobacco) OR zarda)

AND

TS=("relative risk" OR "attributable risk" OR "odds ratio" OR "cross-product ratio" OR "hazards ratio" OR "hazard ratio")

AND

TS=( ("head and neck" OR pharyngeal OR pharynx OR nasopharyngeal OR nasopharynx OR mouth OR oral OR gingival OR lip OR tongue OR palatal OR "oral cavity" OR laryngeal OR larynx OR esophageal OR esophagus OR oesophageal OR oesophagus OR oropharyngeal OR oropharynx OR hypopharyngeal) NEAR/0 (cancer\* OR neoplasm\*)) OR "cancer\$ of the pharynx" OR "cancer\$ of the nasopharynx" OR "neoplasm\$ of the nasopharynx" OR "cancer\$ of mouth" OR "cancer\$ of the mouth" OR "cancer\$ of the lip" OR "cancer\$ of the tongue" OR "cancer\$ of the larynx" OR "neoplasm\$ of the larynx" OR "cancer\$ of the esophagus" OR "neoplasm\$ of the esophagus" OR "cancer\$ of the oesophagus" OR "neoplasm\$ of the oesophagus" OR "cancer\$ of the oropharynx" OR "neoplasm\$ of the oropharynx" OR "cancer\$ of the hypopharynx" OR "neoplasm\$ of the hypopharynx" OR "\$esophageal squamous cell carcinoma")

AND

DOP=1970-01-01/2023-01-30

*Ischemic Heart Disease*

TS=("smokeless tobacco" OR "Tobacco, Smokeless" OR bajjar OR ("betel quid" AND tobacco) OR ("betel quid" NEAR tobacco) OR "chewing tobacco" OR chimó OR snuff OR snuif OR dip OR dohra OR gudakhu OR gul OR gutka OR gutkha OR "hnat hsey" OR iq'mik OR khaini OR kharra OR khiwam OR khimam OR kiwam OR kimam OR "lal dant manjan" OR ("loose leaf" AND (chew OR tobacco)) OR mainpuri OR maras OR mawa OR mshri OR naffa OR nas OR ((nas OR nass) AND tobacco) OR naswar OR nasway OR nasvay OR neffa OR ((pan OR paan) AND tobacco) OR (plug AND tobacco) OR (rapé AND tobacco) OR ((red OR tobacco) AND (toothpowder OR toothpaste)) OR shammah OR snus OR taaba OR tapkeer OR tawa OR tombol OR toombak OR tuibur OR "tobacco water" OR (twist AND tobacco) OR zarda)

AND

TS=("relative risk" OR "attributable risk" OR "odds ratio" OR "cross-product ratio" OR "hazards ratio" OR "hazard ratio")

AND

TS=("coronary artery disease" OR "myocardial isch\$emia" OR "cardiac isch\$emia" OR "silent isch\$emia" OR atherosclerosis OR "isch\$emic heart disease" OR "coronary heart disease" OR "myocardial infarct\*" OR "heart attack" OR "heart infarct\*" OR "cardiac infarct\*")

AND

DOP=1970-01-01/2023-01-30

*Stroke*

TS=("smokeless tobacco" OR "Tobacco, Smokeless" OR bajjar OR ("betel quid" AND tobacco) OR ("betel quid" NEAR tobacco) OR "chewing tobacco" OR chimó OR snuff OR snuif OR dip OR dohra OR gudakhu OR gul OR gutka OR gutkha OR "hnat hsey" OR iq'mik OR khaini OR kharra OR khiwam OR khimam OR kiwam OR kimam OR "lal dant manjan" OR ("loose leaf" AND (chew OR tobacco)) OR mainpuri OR maras OR mawa OR mshri OR naffa OR nas OR ((nas OR nass) AND tobacco) OR naswar OR nasway OR nasvay OR neffa OR ((pan OR paan) AND tobacco) OR (plug AND tobacco) OR (rapé AND tobacco) OR ((red OR tobacco) AND (toothpowder OR toothpaste)) OR shammah OR snus OR taaba OR tapkeer OR tawa OR tombol OR toombak OR tuibur OR "tobacco water" OR (twist AND tobacco) OR zarda)

AND

TS=("relative risk" OR "attributable risk" OR "odds ratio" OR "cross-product ratio" OR "hazards ratio" OR "hazard ratio")

AND

TS=("stroke" OR "cerebrovascular accident" OR ((brain OR cerebral OR cortex OR cerebrovascular OR cortical OR hemisphere OR hemispheric) NEAR/0 infarct\*) OR ((intracerebral OR subarachnoid OR brain) NEAR/0 hemorrhage))

AND

DOP=1970-01-01/2023-01-30

### Section 1.1.3: Global Index Medicus Search Strings

#### *Head and Neck Cancers*

(mh:(F02.145.958\* OR J01.637.767.844.500\* OR VS2.005.002\* OR B01.875.800.575.912.250.093.088\* OR HP4.018.127.479\*) OR tw:("smokeless tobacco" OR "Tobacco, Smokeless" OR bajjar OR ("betel quid" AND tobacco) OR "chewing tobacco" OR chimó OR snuff OR snuif OR dip OR dohra OR gudakhu OR gul OR gutka OR gutkha OR "hnat hsey" OR iq'mik OR khaini OR kharra OR khiwam OR khimam OR kiwam OR kimam OR "lal dant manjan" OR ("loose leaf" AND (chew OR tobacco)) OR mainpuri OR maras OR mawa OR mshri OR naffa OR nas OR ((nas OR nass) AND tobacco) OR naswar OR nasway OR nasvay OR neffa OR((pan OR paan) AND tobacco) OR (plug AND tobacco) OR (rapé AND tobacco) OR ((red OR tobacco) AND (toothpowder OR toothpaste)) OR shammah OR snus OR taaba OR tapkeer OR tawa OR tombol OR toombak OR tuibur OR "tobacco water" OR (twist AND tobacco) OR zarda))

AND

(mh:( E05.318.740.600.800\* OR E05.318.740.600.600\*) OR tw: ("relative risk" OR "attributable risk" OR "odds ratio" OR "cross-product ratio" OR "hazards ratio" OR "hazard ratio"))

AND

(year\_cluster:[1970 TO 2023])

AND



(mh:(C04.588.443\*) OR tw:("head and neck cancer" OR "head and neck cancers" OR "head and neck neoplasm" OR "head and neck neoplasms" OR "pharyngeal cancer" OR "pharyngeal cancers" OR "pharyngeal neoplasm" OR "pharyngeal neoplasms" OR "pharynx cancer" OR "pharynx cancers" OR "pharynx neoplasm" OR "pharynx neoplasms" OR "cancer of the pharynx" OR "cancers of the pharynx" OR "nasopharyngeal cancer" OR "nasopharyngeal cancers" OR "nasopharyngeal neoplasms" OR "nasopharyngeal neoplasm" OR "nasopharynx cancer" OR "nasopharynx cancers" OR "nasopharynx neoplasm" OR "nasopharynx neoplasms" OR "cancer of the nasopharynx" OR "cancers of the nasopharynx" OR "neoplasm of the nasopharynx" OR "neoplasms of the nasopharynx" OR "mouth cancer" OR "mouth cancers" OR "mouth neoplasm" OR "mouth neoplasms" OR "cancer of mouth" OR "cancer of the mouth" OR "cancers of the mouth" OR "oral cancer" OR "oral cancers" OR "oral neoplasm" OR "oral neoplasms" OR "gingival neoplasm" OR "gingival neoplasms" OR "gingival cancer" OR "gingival cancers" OR "lip neoplasm" OR "lip neoplasms" OR "lip cancer" OR "lip cancers" OR "cancer of the lip" OR "cancers of the lip" OR "tongue neoplasm" OR "tongue neoplasms" OR "tongue cancer" OR "tongue cancers" OR "cancer of the tongue" OR "cancers of the tongue" OR "palatal neoplasm" OR "palatal neoplasms" OR "palatal cancer" OR "palatal cancers" OR "oral cavity cancer" OR "oral cavity cancers" OR "laryngeal cancer" OR "laryngeal cancers" OR "laryngeal neoplasm" OR "laryngeal neoplasms" OR "larynx cancer" OR "larynx cancers" OR "larynx neoplasm" OR "larynx neoplasms" OR "cancer of the larynx" OR "cancers of the larynx" OR "neoplasm of the larynx" OR "neoplasms of the larynx" OR "esophageal cancer" OR "esophageal cancers" OR "esophageal neoplasm" OR "esophageal neoplasms" OR "esophagus cancer" OR "esophagus cancers" OR "esophagus neoplasm" OR "esophagus neoplasms" OR "esophageal squamous cell carcinoma" OR "cancer of the esophagus" OR "cancers of the esophagus" OR "neoplasm of the esophagus" OR "neoplasms of the esophagus" OR "oesophageal cancer" OR "oesophageal cancers" OR "oesophageal neoplasm" OR "oesophageal neoplasms" OR "oesophagus cancer" OR "oesophagus cancers" OR "oesophagus neoplasm" OR "oesophagus neoplasms" OR "oesophageal squamous cell carcinoma" OR "cancer of the oesophagus" OR "cancers of the oesophagus" OR "neoplasm of the oesophagus" OR "neoplasms of the oesophagus" OR "oropharyngeal cancer" OR "oropharyngeal cancers" OR "oropharynx cancer" OR "oropharynx cancers" OR "oropharyngeal neoplasms" OR "oropharynx neoplasm" OR "oropharynx neoplasms" OR "cancer of the oropharynx" OR "cancers of the oropharynx" OR "neoplasm of the oropharynx" OR "neoplasms of the oropharynx" OR "hypopharyngeal cancer" OR "hypopharyngeal cancers" OR "hypopharyngeal neoplasms" OR "cancer of the hypopharynx" OR "cancers of the hypopharynx" OR "neoplasm of the hypopharynx" OR "neoplasms of the hypopharynx"))

#### *Ischemic Heart Disease*

(tw:("smokeless tobacco" OR "Tobacco, Smokeless" OR bazaar OR ("betel quid" AND tobacco) OR "chewing tobacco" OR chimó OR snuff OR snuif OR dip OR dohra OR gudakhu OR gul OR gutka OR gutkha OR "hnat hsey" OR iq'mik OR khaini OR kharra OR khiwam OR khimam OR kiwam OR kimam OR "lal dant manjan" OR ("loose leaf" AND (chew OR tobacco)) OR mainpuri OR maras OR mawa OR mshri OR naffa OR nas OR ((nas OR nass) AND tobacco) OR naswar OR nasway OR nasvay OR neffa OR((pan OR paan) AND tobacco) OR (plug AND tobacco) OR (rapé AND tobacco) OR ((red OR tobacco) AND (toothpowder OR toothpaste)) OR shammah OR snus OR taaba OR tapkeer OR tawa OR tombol OR toombak OR tuibur OR "tobacco water" OR (twist AND tobacco) OR zarda))

AND

(tw: ("relative risk" OR "attributable risk" OR "odds ratio" OR "cross-product ratio" OR "hazards ratio" OR "hazard ratio"))

AND

(year\_cluster:[1970 TO 2023])

AND

(mh:(C14.280.647.250.260\* OR C14.280.647\* OR C14.907.137.126.307\*) OR tw:("coronary artery disease" OR "myocardial ischemia" OR "myocardial ischaemia" OR "cardiac ischemia" OR "cardiac ischaemia" OR "silent ischemia" OR "silent ischaemia" OR "atherosclerosis" OR "ischaemic heart disease" OR "ischemic heart disease" OR "coronary heart disease" OR "myocardial infarct" OR "myocardial infarcts" OR "myocardial infarction" OR "myocardial infarctions" OR "heart attack" OR "heart infarct" OR "heart infarcts" OR "heart infarction" OR "heart infarctions" OR "cardiac infarct" OR "cardiac infarcts" OR "cardiac infarction"))

*Stroke*

(tw:("smokeless tobacco" OR "Tobacco, Smokeless" OR bazaar OR ("betel quid" AND tobacco) OR "chewing tobacco" OR chimó OR snuff OR snuif OR dip OR dohra OR gudakhu OR gul OR gutka OR gutkha OR "hnat hsey" OR iq'mik OR khaini OR kharra OR khiwam OR khimam OR kiwam OR kimam OR "lal dant manjan" OR ("loose leaf" AND (chew OR tobacco)) OR mainpuri OR maras OR mawa OR mshri OR naffa OR nas OR ((nas OR nass) AND tobacco) OR naswar OR nasway OR nasvay OR neffa OR((pan OR paan) AND tobacco) OR (plug AND tobacco) OR (rapé AND tobacco) OR ((red OR tobacco) AND (toothpowder OR toothpaste)) OR shammah OR snus OR taaba OR tapkeer OR tawa OR tombol OR toombak OR tuibur OR "tobacco water" OR (twist AND tobacco) OR zarda))

AND

(tw: ("relative risk" OR "attributable risk" OR "odds ratio" OR "cross-product ratio" OR "hazards ratio" OR "hazard ratio"))

AND

(year\_cluster:[1970 TO 2023])

AND

(mh:(C10.228.140.300.150.477\* OR C10.228.140.300.775\*OR C10.228.140.300.535\*) OR tw:(stroke OR "cerebrovascular accident" OR "brain infarct" OR "brain infarcts" OR "brain infarction" OR "brain infarctions" OR "cerebral infarct" OR "cerebral infarcts" OR "cerebral infarction" OR "cerebral infarctions" OR "cortex infarct" OR "cortex infarcts" OR "cortex infarction" OR "cortex infarctions" OR "cerebrovascular infarct" OR "cerebrovascular infarcts" OR "cerebrovascular infarction" OR "cerebrovascular infarctions" OR "cortical infarct" OR "cortical infarcts" OR "cortical infarction" OR "cortical infarctions" OR "hemisphere infarct" OR "hemisphere infarcts" OR "hemisphere infarction" OR "hemisphere infarctions" OR "hemispheric infarct" OR "hemispheric infarcts" OR "hemispheric infarction" OR "hemispheric infarctions" OR "intracerebral hemorrhage" OR "intracerebral haemorrhage" OR "subarachnoid hemorrhage" OR "subarachnoid haemorrhage" OR "brain hemorrhage"))

### Section 1.2: Inclusion and Exclusion Criteria

Studies were screened on the basis of pre-determined exclusion and inclusion criteria. These criteria were readily available for all reviewers to consult and were described in detail to the research team prior to screening. The same criteria were used to resolve conflicts by a third screener.

#### Exclusion criteria:

- Irrelevant study design: Study does not use a cohort or (nested) case-control study design.
- Non-chewing tobacco exposure: Study does not specifically report results on chewing tobacco or a chewing tobacco product.
- Highly specific sub-population: Study focuses on a very specific sub-population (eg. former cancer survivors or diabetes patients) that would more likely than not interfere with the generalizability of the findings.
- Irrelevant focus: Study does not report on the relationship between chewing tobacco and the relevant outcome.
- Irrelevant outcome: Study does not report on the outcome of interest, even if it reports all other relevant information.
- GBD study: Study reports on Global Burden of Disease results.
- Incorrect exposure categories: Study does report on chewing tobacco, but it does not report binary effect sizes or contains information to manually calculate binary effect sizes.

#### Inclusion criteria:

- Study design: Study uses a cohort or (nested) case-control study design.
- Risk and focus: Study reports an effect size for chewing tobacco. Studies that use the term smokeless tobacco in locations where chewing tobacco is the overwhelmingly dominant form of smokeless tobacco and no explicit non-chewing form is included in the case definition may be considered.
- Outcome: Study has results for the outcome of interest.

### Section 1.3: Outcome Definitions

The outcomes examined in this review were defined in accordance with the health outcome definitions used in the Global Burden of Disease study<sup>1</sup>.

**Table S1: Definitions of seven included outcomes**

| Cause Grouping          | Cause Name                 | Definition                                                                                                                                                    |
|-------------------------|----------------------------|---------------------------------------------------------------------------------------------------------------------------------------------------------------|
| Head and neck cancers   | Esophageal cancer          | Malignant neoplasm of the esophagus                                                                                                                           |
|                         | Laryngeal cancer           | Malignant neoplasm of the larynx                                                                                                                              |
|                         | Lip and oral cavity cancer | Malignant neoplasm of the lips and oral cavity                                                                                                                |
|                         | Nasopharyngeal cancer      | Malignant neoplasm of the nasopharynx                                                                                                                         |
|                         | Other pharynx cancer       | Malignant neoplasm of the oropharynx, hypopharynx, and other pharynx                                                                                          |
| Cardiovascular outcomes | Ischemic heart disease     | Also referred to as acute myocardial infarction (MI): definite and possible MI according to the third universal definition of myocardial infarction; includes |

|  |        |                                                                                                                                |
|--|--------|--------------------------------------------------------------------------------------------------------------------------------|
|  |        | recurrent cases and cases who died before reaching medical care                                                                |
|  | Stroke | Rapidly developing clinical signs of usually focal disturbance of cerebral function lasting more than 24 h or leading to death |

#### Section 1.4: Exposure Definition

The exposure examined in this review was defined according to the chewing tobacco definition used in the Global Burden of Disease study<sup>2</sup>. We consider chewing tobacco as the current daily or occasional use of chewing tobacco, including local products such as betel quid *with* tobacco. It is a dichotomous risk factor in which the use of chewing tobacco products is compared to non-users (reference).

**Table S2: Local smokeless tobacco products categorized as chewing tobacco**

| Product                                        | Description                                                                                                                                                                                                                                    | Mode of use                                          |
|------------------------------------------------|------------------------------------------------------------------------------------------------------------------------------------------------------------------------------------------------------------------------------------------------|------------------------------------------------------|
| Guthka or gutka                                | Areca nut, slaked lime, catechu and sun-dried, roasted, finely chopped tobacco with flavorings and sweeteners.                                                                                                                                 | Held in mouth and chewed or sucked.                  |
| Khat, chat, qaad, qat                          | Stimulant drug made from the leaves and twigs, evergreen shrub. Active ingredients are cathine and cathinone. We are only interested in Khat <i>with</i> tobacco.                                                                              | Typically chewed — retained in the cheek and chewed. |
| Man pori, mainpuri, kapoori                    | Mixture of finely cut betel nut and small pieces of tobacco leaves treated in slaked lime and flavoring agents such as powdered cloves, cardamom, Kewara and sandalwood powder. Catechu is sometimes used.                                     | Chewed and smoked                                    |
| Mawa                                           | Thin areca nut shavings with slaked lime and tobacco flakes.                                                                                                                                                                                   | Chewed                                               |
| Paan, pan, betel quid, pan masala or betel nut | Generally contains betel leaf, slaked lime and areca nut, sometimes spices such as clove, saffron, aniseed, turmeric, mustard, or other sweeteners are added. Tobacco is optional. We are only interested in pan or betel <i>with</i> tobacco. | Placed in the mouth and chewed.                      |
| Sada Pata or chadha                            | Air cured tobacco. Sometimes used in betel quid.                                                                                                                                                                                               | Chewed or held in mouth.                             |
| Zarda                                          | Flaked chewing tobacco flavored with spices, herbs, etc. Often used in betel quid or mixed with with or areca nut.                                                                                                                             | Chewed                                               |

### Section 1.5: Data Extraction

Data was extracted using a modified Covidence 2.0 extraction template. The extracted variables are described in the template below.

**Table S3: Data Extraction Template**

| Extraction field name            | Field type    | Description                                                                                                                                          | Options (if applicable)                                                      |
|----------------------------------|---------------|------------------------------------------------------------------------------------------------------------------------------------------------------|------------------------------------------------------------------------------|
| NID                              | Free text     | Unique identifier for the data created for the Global Health Data Exchange (GHDx)                                                                    |                                                                              |
| PMID (if available)              | Free text     | Unique identifier for the data used to link the study to PubMed or other database                                                                    |                                                                              |
| Title                            | Free text     | Title of paper that data are extracted from                                                                                                          |                                                                              |
| File path                        | Free text     | Full file path for the article where it is stored internally                                                                                         |                                                                              |
| Note                             | Free text     | Notes related to extraction, including assumptions, data adjustment, concerns about the source, and anything else that may be useful for the modeler |                                                                              |
| Risk                             | Single choice | What is the risk factor of interest?                                                                                                                 | Chewing tobacco                                                              |
| Risk mapping                     | Single choice | What is the relationship between study definition of the risk and the GBD definition of the risk?                                                    | Exact; Component; Aggregate; Different form; Unspecified                     |
| Study-level risk definition      | Free text     | How does the study define the relevant risk factor?                                                                                                  |                                                                              |
| Exposure assessment level        | Single choice | Level at which the exposure was assessed. It should always be measured at the individual level for smoking and chewing tobacco                       | At the individual; Other [fill in]                                           |
| Exposure assessment period       | Single choice | What was the frequency of exposure assessment?                                                                                                       | Only at baseline; Multiple times at follow-up; Continuous                    |
| Exposure assessment period value | Free text     | If the exposure assessment period is multiple times, specify the number of time the exposure was assessed, excluding baseline.                       |                                                                              |
| Exposure recall period           | Single choice | Describe the unit of exposure recall used in data collection, primarily for self-reported data.                                                      | Lifetime; Point; Period: Days; Period: Weeks; Period: Years; Other [fill in] |
| Exposure recall period value     | Free text     | If exposure recall was over a period of time (instead of Lifetime or Point), how long is the period?                                                 |                                                                              |

|                                |               |                                                                                                                                                                                                                                                                                                                                                                                                                                                                                                                                                                                                                             |                                                                                                                                                                                                                                                                                                                                                                                                                                                                                                                                                                                                                      |
|--------------------------------|---------------|-----------------------------------------------------------------------------------------------------------------------------------------------------------------------------------------------------------------------------------------------------------------------------------------------------------------------------------------------------------------------------------------------------------------------------------------------------------------------------------------------------------------------------------------------------------------------------------------------------------------------------|----------------------------------------------------------------------------------------------------------------------------------------------------------------------------------------------------------------------------------------------------------------------------------------------------------------------------------------------------------------------------------------------------------------------------------------------------------------------------------------------------------------------------------------------------------------------------------------------------------------------|
| Risk assessment method         | Multi-select  | Please specify the method of exposure assessment.                                                                                                                                                                                                                                                                                                                                                                                                                                                                                                                                                                           | Self-report (human/environment); Biomarker (human); Physical measurement (human); Direct observation (human/environment); Disease registry (human); Physical measurement/monitoring (environment)                                                                                                                                                                                                                                                                                                                                                                                                                    |
| Risk data source type          | Single choice | Identify the underlying mode of data collection for the risk factor.                                                                                                                                                                                                                                                                                                                                                                                                                                                                                                                                                        | Case notification – general; Registry – cancer; Registry – other/unknown; Facility – inpatient; Facility – outpatient; Facility – discharge; Facility – long-term; Facility – hospice; Facility – ambulatory; Facility – primary; Facility – other/unknown; Vital registration – national; Vital registration – sample; Vital registration – sentinel; Vital registration – other/unknown; Survey – cross-sectional; Survey – cohort; Survey – longitudinal; Survey – other/unknown; Survey – VA; Survey – Sibling history; Surveillance – VA; Surveillance – facility; Surveillance – other/unknown; Unidentifiable |
| Study-level outcome            | Multi-select  | Choose the outcomes that best match the outcome definition used for the study as a whole.<br><br>More detail is provided for each review. Eg. for IHD: Ischemic heart disease is synonymous with coronary heart disease (CHD), coronary artery disease (CAD), and atherosclerotic heart disease. The other options are components of the GBD IHD definition. You should choose the outcomes that best match the outcome definition used in the study.<br>Eg. if a study looks as Myocardial Infraction but does not specify if it looks at ST-elevation or non-ST-elevation, you would choose "Myocardial infraction (MI)." | Ischemic heart disease; Acute coronary syndrome (ACS); Myocardial infraction (MI); Unstable angina; ST-elevation MI (STEMI); Non-ST-elevation MI (NSTEMI); Heart failure due to IHD; Ischemic cardiomyopathy; Sudden cardiac death/arrest; Unheralded/unexpected coronary death; Other [fill in]<br><br>Esophageal cancer; Larynx cancer; Lip and oral cavity cancer; Nasopharynx cancer; Other pharynx cancer; Other [fill in]<br><br>Cerebrovascular disease; Stroke (unspecified); Ischemic stroke/cerebral infarction; Intracerebral hemorrhage; Subarachnoid hemorrhage (SAH); Other [fill in]                  |
| Study-level outcome definition | Free text     | Provide a brief description of the outcome as reported in the study                                                                                                                                                                                                                                                                                                                                                                                                                                                                                                                                                         |                                                                                                                                                                                                                                                                                                                                                                                                                                                                                                                                                                                                                      |
| ICD codes (if available)       | Free text     | Provide the ICD codes reported in the study. If not provided, do not fill in. If provided but not ICD-10, mention what ICD code scheme is used by the study.                                                                                                                                                                                                                                                                                                                                                                                                                                                                |                                                                                                                                                                                                                                                                                                                                                                                                                                                                                                                                                                                                                      |
| Outcome type                   | Single choice | Please specify if the outcome definition included incidence of or mortality as a disease endpoint.                                                                                                                                                                                                                                                                                                                                                                                                                                                                                                                          | Incidence; Mortality; Incidence and/or Mortality                                                                                                                                                                                                                                                                                                                                                                                                                                                                                                                                                                     |
| Outcome assessment method      | Multi-select  | Choose at least one, maximum three                                                                                                                                                                                                                                                                                                                                                                                                                                                                                                                                                                                          | Physician diagnosis; Biomarker; Death certificates; Administrative medical records or disease registries; Self-report                                                                                                                                                                                                                                                                                                                                                                                                                                                                                                |

|                                                  |                  |                                                                                                                                                                                                                                                                                                                                                                                                                                                                                                                                                                                                                                                                                                                                                                                                       |         |
|--------------------------------------------------|------------------|-------------------------------------------------------------------------------------------------------------------------------------------------------------------------------------------------------------------------------------------------------------------------------------------------------------------------------------------------------------------------------------------------------------------------------------------------------------------------------------------------------------------------------------------------------------------------------------------------------------------------------------------------------------------------------------------------------------------------------------------------------------------------------------------------------|---------|
| Study/cohort name (if available)                 | Free text        | Enter the name of the study or name used to identify the cohort if provided. Does not equate to the title of the article.                                                                                                                                                                                                                                                                                                                                                                                                                                                                                                                                                                                                                                                                             |         |
| Study funding source                             | Free text        | List the entities involved                                                                                                                                                                                                                                                                                                                                                                                                                                                                                                                                                                                                                                                                                                                                                                            |         |
| Possible conflicts of interest for study authors | Free text        | List any conflicts of interest disclosed by the authors                                                                                                                                                                                                                                                                                                                                                                                                                                                                                                                                                                                                                                                                                                                                               |         |
| Non-university author affiliation                | Free text        | List any non-university affiliations included in the author list                                                                                                                                                                                                                                                                                                                                                                                                                                                                                                                                                                                                                                                                                                                                      |         |
| Study location(s): Location name                 | Table; Free text | Specify the location of the study according to the IHME_Locations document. IHME Location ID refers to the ihme_loc_id value, not the numerical location_id. For studies with subnational data from countries where we model at the subnational level, use one row in the location table to note ONLY the subnational location. For studies with subnational data from countries not in that list, list ONLY the national location(s). Then, enter the specific location name in the question asking for the exact geographic scope of the study below.<br>SUBNATIONAL COUNTRIES: Brazil, China, Ethiopia, India, Indonesia, Iran, Italy, Japan, Kenya, Mexico, New Zealand, Nigeria, Norway, Pakistan, Philippines, Poland, Russian Federation, South Africa, Ukraine, United Kingdom, United States |         |
| Study location(s): IHME location ID              | Table; Free text |                                                                                                                                                                                                                                                                                                                                                                                                                                                                                                                                                                                                                                                                                                                                                                                                       |         |
| Geographically representative                    | Single choice    | Were the study participants geographically representative of the IHME location(s)?                                                                                                                                                                                                                                                                                                                                                                                                                                                                                                                                                                                                                                                                                                                    | Yes; No |
| Geographic scope                                 | Free text        | If not geographically representative; describe exact geographic scope.                                                                                                                                                                                                                                                                                                                                                                                                                                                                                                                                                                                                                                                                                                                                |         |
| Representative                                   | Single choice    | Where the study participants representative of the study's geographic scope?                                                                                                                                                                                                                                                                                                                                                                                                                                                                                                                                                                                                                                                                                                                          | Yes; No |
| Population/selection criteria                    | Free text        | If not representative; describe exact population/selection criteria:                                                                                                                                                                                                                                                                                                                                                                                                                                                                                                                                                                                                                                                                                                                                  |         |
| Mortality among those with disease               | Single choice    | Is the study looking at mortality among people who have already developed the outcome?                                                                                                                                                                                                                                                                                                                                                                                                                                                                                                                                                                                                                                                                                                                | Yes; No |

|                                                             |                  |                                                                                                                                                                             |                                                                                                                                                                                                                              |
|-------------------------------------------------------------|------------------|-----------------------------------------------------------------------------------------------------------------------------------------------------------------------------|------------------------------------------------------------------------------------------------------------------------------------------------------------------------------------------------------------------------------|
| Start year                                                  | Free text        | Year the study began                                                                                                                                                        |                                                                                                                                                                                                                              |
| End year                                                    | Free text        | Year the study ended                                                                                                                                                        |                                                                                                                                                                                                                              |
| Study design                                                | Single choice    | What study design is used to derive the effect size of interest?                                                                                                            | Prospective cohort; Case-control; Nested case-control; Case-cohort; Other [fill in]                                                                                                                                          |
| Follow-up duration:<br>Type of follow-up measure            | Table; Free text | For cohort studies only. Possible measures include max, min, mean, median (with a preference for mean or median if available)<br>Possible units include years, months, days |                                                                                                                                                                                                                              |
| Follow-up duration:<br>Follow-up units                      | Table; Free text |                                                                                                                                                                             |                                                                                                                                                                                                                              |
| Follow-up duration:<br>Duration (value) of follow-up period | Table; Free text |                                                                                                                                                                             |                                                                                                                                                                                                                              |
| Percentage loss to follow-up                                | Free text        | Extract the proportion of individuals in the study (particularly for cohort studies) that were lost to follow-up if this value is reported. Should be a range of 0-1.       |                                                                                                                                                                                                                              |
| Percentage non-responsive                                   | Free text        | Extract the proportion of individuals in the study that were non-responsive to recruitment attempts if this value is reported. Should be a range from 0-1.                  |                                                                                                                                                                                                                              |
| Control pool                                                | Multi-select     | For case-control studies. What population are the controls selected from? Hospital includes other patients. Visitors include people accompanying the patients.              | Community; Hospital; Visitors; Relatives; Other [fill in]                                                                                                                                                                    |
| Exposure assessment point                                   | Single choice    | Which form of the exposure was included in relative risk estimation analysis?                                                                                               | Baseline; Cumulative average; Cumulative overall; Change in exposure                                                                                                                                                         |
| ES*: Exposed group definition                               | Free text        | Provide a brief description of the exposed group (i.e., the comparison group) as used to estimate the effect size                                                           |                                                                                                                                                                                                                              |
| ES*: Exposure temporality                                   | Single choice    | What is the temporality of chewing tobacco use that is used for the exposed group for this effect size?                                                                     | Ever; Current; Former; Never; Non-current (former and never)                                                                                                                                                                 |
| ES*: Unexposed group definition                             | Free text        | Provide a brief description of the unexposed group (i.e., the reference group) as used to estimate the effect size                                                          |                                                                                                                                                                                                                              |
| ES*: Temporality of unexposed group                         | Single choice    | What is the temporality of chewing tobacco use that is used for the unexposed group for this effect size?                                                                   | Ever; Current; Former; Never; Non-current (former and never)                                                                                                                                                                 |
| ES*: Outcome                                                | Multi-select     | Choose the outcomes that best match the outcome definition used for this effect size.                                                                                       | Ischemic heart disease; Acute coronary syndrome (ACS); Myocardial infraction (MI); Unstable angina; ST-elevation MI (STEMI); Non-ST-elevation MI (NSTEMI); Heart failure due to IHD; Ischemic cardiomyopathy; Sudden cardiac |



|                                          |                  |                                                                                                                                                                                                                                                                                |                                                                                                                                                                                                                                                                                                                                                                               |
|------------------------------------------|------------------|--------------------------------------------------------------------------------------------------------------------------------------------------------------------------------------------------------------------------------------------------------------------------------|-------------------------------------------------------------------------------------------------------------------------------------------------------------------------------------------------------------------------------------------------------------------------------------------------------------------------------------------------------------------------------|
|                                          |                  |                                                                                                                                                                                                                                                                                | <p>death/arrest; Unheralded/unexpected coronary death; Other [fill in]</p> <p>Esophageal cancer; Larynx cancer; Lip and oral cavity cancer; Nasopharynx cancer; Other pharynx cancer; Other [fill in]</p> <p>Cerebrovascular disease; Stroke (unspecified); Ischemic stroke/cerebral infarction; Intracerebral hemorrhage; Subarachnoid hemorrhage (SAH); Other [fill in]</p> |
| ES*: Outcome definition                  | Free text        | Provide a brief description of the outcome as reported in the study specific to this effect size.                                                                                                                                                                              |                                                                                                                                                                                                                                                                                                                                                                               |
| ES*: ICD-10 codes                        | Free text        | Provide the ICD codes reported in the study that are associated with the outcome. If not provided, do not fill in. If provided but not ICD-10, mention what ICD code scheme is used by the study.                                                                              |                                                                                                                                                                                                                                                                                                                                                                               |
| ES*: Confounders controlled for          | Multi-select     | Select all of the confounders that this effect size is adjusted for as described in the study. List any others not included in the options in the "Other" category, separated by ","                                                                                           | Age; Sex; Education; Income; Smoking: Use of other smokeless products; Alcohol use/drinking; Physical activity; Dietary components; BMI; Hypertension; Diabetes; Hypercholesterolemia; Race or ethnicity; Socioeconomic status; Geographic region; Occupation; Religion; Genotype; Urbanicity; Other [fill in]                                                                |
| ES*: Level of adjustment                 | Single choice    | The effect size's degree of adjustment relative to other models reported in the study.                                                                                                                                                                                         | Most adjusted reported in the study; Least adjusted reported in the study; Manually calculated; Other [fill in]                                                                                                                                                                                                                                                               |
| ES*: Subgroup                            | Free text        | If this effect size is for a subgroup of the study sample, what is the subgroup? Eg. "males" or "females"<br>Should also be reflected in demographic metadata where possible.                                                                                                  |                                                                                                                                                                                                                                                                                                                                                                               |
| ES*: Smoking status                      | Single choice    | What is the smoking status of the analytic sample used to derive this effect status?                                                                                                                                                                                           | Never smokers; Current smokers; Former smokers; Non-smokers; Any smoking status; Unknown                                                                                                                                                                                                                                                                                      |
| Age of the effect size sample: Age start | Table; Free text | You need to have either both age start and age end or the mean and standard deviation of the ages. If age start is not provided but age end is, assume 18 if population is adults and 15 otherwise. If age end is not provided but age start is, assume 99 as maximum age end. |                                                                                                                                                                                                                                                                                                                                                                               |
| Age of the effect size sample: Age end   | Table; Free text |                                                                                                                                                                                                                                                                                |                                                                                                                                                                                                                                                                                                                                                                               |
| Age of the effect size sample: Age mean  | Table; Free text |                                                                                                                                                                                                                                                                                |                                                                                                                                                                                                                                                                                                                                                                               |
| Age of the effect size sample: Age SD    | Table; Free text |                                                                                                                                                                                                                                                                                |                                                                                                                                                                                                                                                                                                                                                                               |
| Percent male                             | Table; Free text | A value between and include 1 (all male) and 0 (all female).                                                                                                                                                                                                                   |                                                                                                                                                                                                                                                                                                                                                                               |

|                                               |                  |                                                                                                                                                                                                                                                                                                                                                           |  |
|-----------------------------------------------|------------------|-----------------------------------------------------------------------------------------------------------------------------------------------------------------------------------------------------------------------------------------------------------------------------------------------------------------------------------------------------------|--|
| Cohort sample sizes: Exposed person-years     | Table; Free text | If study is a cohort study, fill this table in as much as possible. At least one out of the "person-years", "events" or "sample size" column groups need to be filled out. Make sure the effect size number aligns with the metadata specified in that effect size section above.                                                                         |  |
| Cohort sample sizes: Unexposed person-years   | Table; Free text |                                                                                                                                                                                                                                                                                                                                                           |  |
| Cohort sample sizes: Total person-years       | Table; Free text |                                                                                                                                                                                                                                                                                                                                                           |  |
| Cohort sample sizes: Exposed events/cases     | Table; Free text |                                                                                                                                                                                                                                                                                                                                                           |  |
| Cohort sample sizes: Unexposed events/cases   | Table; Free text |                                                                                                                                                                                                                                                                                                                                                           |  |
| Cohort sample sizes: Total events/cases       | Table; Free text |                                                                                                                                                                                                                                                                                                                                                           |  |
| Cohort sample sizes: Exposed sample size      | Table; Free text |                                                                                                                                                                                                                                                                                                                                                           |  |
| Cohort sample sizes: Unexposed sample size    | Table; Free text |                                                                                                                                                                                                                                                                                                                                                           |  |
| Cohort sample sizes: Total sample size        | Table; Free text |                                                                                                                                                                                                                                                                                                                                                           |  |
| Case-control sample sizes: Exposed cases      | Table; Free text | If study is a case-control study, fill this table in as much as possible. You should provide enough information that the modeler could fill in the blank columns by adding and subtracting.<br><br>Make sure the effect size number aligns with the metadata specified in that effect size section above.                                                 |  |
| Case-control sample sizes: Exposed controls   | Table; Free text |                                                                                                                                                                                                                                                                                                                                                           |  |
| Case-control sample sizes: Unexposed cases    | Table; Free text |                                                                                                                                                                                                                                                                                                                                                           |  |
| Case-control sample sizes: Unexposed controls | Table; Free text |                                                                                                                                                                                                                                                                                                                                                           |  |
| Case-control sample sizes: Total cases        | Table; Free text |                                                                                                                                                                                                                                                                                                                                                           |  |
| Case-control sample sizes: Total controls     | Table; Free text |                                                                                                                                                                                                                                                                                                                                                           |  |
| Effect sizes: Effect size                     | Table; Free text | Extract either CI or SD/SE with each effect size<br>Effect size type: OR, RR, HR<br>CI type: 95, 99, or otherwise the % confidence indicated by upper and lower CI<br>Non-CI uncertainty type: SD or SE<br>Effect size unit: linear, logit, log<br>Make sure the effect size number aligns with the metadata specified in that effect size section above. |  |
| Effect sizes: Effect size type                | Table; Free text |                                                                                                                                                                                                                                                                                                                                                           |  |
| Effect sizes: Lower CI                        | Table; Free text |                                                                                                                                                                                                                                                                                                                                                           |  |
| Effect sizes: Upper CI                        | Table; Free text |                                                                                                                                                                                                                                                                                                                                                           |  |
| Effect sizes: CI type                         | Table; Free text |                                                                                                                                                                                                                                                                                                                                                           |  |
| Effect sizes: Non-CI uncertainty value        | Table; Free text |                                                                                                                                                                                                                                                                                                                                                           |  |
| Effect sizes: Non-CI uncertainty type         | Table; Free text |                                                                                                                                                                                                                                                                                                                                                           |  |
| Effect sizes: Effect size unit                | Table; Free text |                                                                                                                                                                                                                                                                                                                                                           |  |
| Location of effect sizes: Page number         | Table; Free text | In supplement: Yes or No<br><br>Page number (where you found effect_size) from literature where you found effect size; Use page number(s) of article, not page # of pdf                                                                                                                                                                                   |  |
| Location of effect sizes: Table number        | Table; Free text |                                                                                                                                                                                                                                                                                                                                                           |  |
| Location of effect sizes: In supplement       | Table; Free text |                                                                                                                                                                                                                                                                                                                                                           |  |

|  |  |                                                                                                        |  |
|--|--|--------------------------------------------------------------------------------------------------------|--|
|  |  | Make sure the effect size number aligns with the metadata specified in that effect size section above. |  |
|--|--|--------------------------------------------------------------------------------------------------------|--|

## Section 2: Data Inputs

We extracted our data inputs from peer-reviewed studies identified through the systematic reviews. The data from included studies included in our systematic reviews were extracted by one member of the research team using the extraction template described above. At minimum, the most and least adjusted relevant effect size and related uncertainty reported for each study exposure-outcome definition pairing and analytical sample was extracted, along with the metadata for each effect size and the metadata for the study overall. Reports that presented findings from the same cohort or case-control study population were merged and extracted as a single study to identify all relevant metadata and potential effect sizes for that population. For studies that did not report an effect size for a chewing tobacco product or chewing tobacco broadly and the outcome of interest but did report the number of exposed cases, unexposed cases, exposed controls, and unexposed controls, the extractor manually calculated the unadjusted effect size corresponding to the study design and its related uncertainty.

## Section 2.1: Study Characteristics

**Table S4: Summary of Study Metadata and Characteristics**

| Author      | Year | Health outcome    | Location                   | Study design       | Sex   | Age range | Exposure assessment | Outcome assessment method                            | Endpoint  | Sample size | Exposed | Follow-up (years) | Cases | Controls | Control pool      | Smoking status     | Chewing tobacco type    |
|-------------|------|-------------------|----------------------------|--------------------|-------|-----------|---------------------|------------------------------------------------------|-----------|-------------|---------|-------------------|-------|----------|-------------------|--------------------|-------------------------|
| Akhtar      | 2012 | Esophageal cancer | Sindh                      | Case-control       | Both  | 20-99     | Self-report         | Biomarker                                            | Morbidity | NA          | NA      | N/A               | 68    | 335      | Hospital          | Never smokers      | Betel Quid with Tobacco |
| Chitra      | 2004 | Esophageal cancer | Tamil Nadu                 | Case-control       | Both  | N/A       | Self-report         | Administrative medical records or disease registries | Morbidity | NA          | NA      | N/A               | 90    | 90       | Hospital          | Any smoking status | Exact                   |
| Dar         | 2012 | Esophageal cancer | Jammu & Kashmir and Ladakh | Case-cohort        | Both  | 18-99     | Biomarker           | Biomarker                                            | Incidence | NA          | NA      | 3.3               | 702   | 1,663    | Hospital          | Any smoking status | Gutkha                  |
| Das         | 2017 | Esophageal cancer | Assam                      | Case-control       | Both  | 40-75     | Self-report         | Physician diagnosis; Biomarker                       | Morbidity | NA          | NA      | N/A               | 100   | 100      | Hospital          | Any smoking status | Betel Quid with Tobacco |
| Das         | 2017 | Esophageal cancer | Assam                      | Case-control       | Both  | 40-75     | Self-report         | Physician diagnosis; Biomarker                       | Morbidity | NA          | NA      | N/A               | NA    | NA       | Hospital          | Any smoking status | Zarda                   |
| Das         | 2017 | Esophageal cancer | Assam                      | Case-control       | Both  | 40-75     | Self-report         | Physician diagnosis; Biomarker                       | Morbidity | NA          | NA      | N/A               | NA    | NA       | Hospital          | Any smoking status | Dhapat                  |
| Ganesh      | 2009 | Esophageal cancer | Maharashtra                | Case-control       | Both  | 30-75     | Self-report         | Biomarker                                            | Morbidity | NA          | NA      | N/A               | 400   | 1,458    | N/A               | Any smoking status | Pan with Tobacco        |
| Ganesh      | 2009 | Esophageal cancer | Maharashtra                | Case-control       | Both  | 30-75     | Self-report         | Biomarker                                            | Morbidity | NA          | NA      | N/A               | 296   | 1,164    | N/A               | Any smoking status | Exact                   |
| Ihsan       | 2010 | Esophageal cancer | Assam                      | Case-control       | Both  | 18-99     | Self-report         | Biomarker                                            | Morbidity | NA          | NA      | N/A               | 142   | 185      | Unknown           | Any smoking status | Exact                   |
| Jayalekshmi | 2021 | Esophageal cancer | Kerala                     | Prospective cohort | Males | 30-84     | Self-report         | Administrative medical records or disease registries | Incidence | 60,737      | 18,564  | 23                | NA    | NA       | N/A               | Any smoking status | Exact                   |
| Joshi       | 2009 | Esophageal cancer | Uttarakhand                | Case-control       | Both  | 31-99     | Self-report         | Physician diagnosis                                  | Morbidity | NA          | NA      | N/A               | 94    | 94       | Hospital Visitors | Any smoking status | Exact                   |

| Author           | Year | Health outcome    | Location           | Study design | Sex     | Age range | Exposure assessment | Outcome assessment method                            | Endpoint  | Sample size | Exposed | Follow-up (years) | Cases | Controls | Control pool | Smoking status     | Chewing tobacco type    |
|------------------|------|-------------------|--------------------|--------------|---------|-----------|---------------------|------------------------------------------------------|-----------|-------------|---------|-------------------|-------|----------|--------------|--------------------|-------------------------|
| Jussawalla       | 1971 | Esophageal cancer | Maharashtra, Urban | Case-control | Both    | 18-99     | Self-report         | Administrative medical records or disease registries | Morbidity | NA          | NA      | N/A               | 305   | 2005     | Community    | Non-smokers        | Pan with Tobacco        |
| Nandakumar       | 1996 | Esophageal cancer | Karnataka          | Case-control | Females | 18-99     | Self-report         | Administrative medical records or disease registries | Morbidity | NA          | NA      | N/A               | 121   | 274      | Hospital     | Any smoking status | Exact                   |
| Nandakumar       | 1996 | Esophageal cancer | Karnataka          | Case-control | Males   | 18-99     | Self-report         | Administrative medical records or disease registries | Morbidity | NA          | NA      | N/A               | 151   | 327      | Hospital     | Any smoking status | Exact                   |
| Nayar            | 2000 | Esophageal cancer | India              | Case-control | Both    | 18-99     | Self-report         | Physician diagnosis; Biomarker                       | Morbidity | NA          | NA      | N/A               | 150   | 150      | Relatives    | Any smoking status | Betel Quid with Tobacco |
| Notani           | 1988 | Esophageal cancer | Maharashtra        | Case-control | Males   | 15-99     | Self-report         | Administrative medical records or disease registries | Morbidity | NA          | NA      | N/A               | 236   | 215      | Hospital     | Non-smokers        | Exact                   |
| Phukan           | 2001 | Esophageal cancer | Assam              | Case-control | Females | 18-99     | Self-report         | Biomarker                                            | Morbidity | NA          | NA      | N/A               | 144   | 287      | Caretakers   | Any smoking status | Chadha                  |
| Phukan           | 2001 | Esophageal cancer | Assam              | Case-control | Males   | 18-99     | Self-report         | Biomarker                                            | Morbidity | NA          | NA      | N/A               | 358   | 706      | Caretakers   | Any smoking status | Chadha                  |
| Saikia           | 2015 | Esophageal cancer | Assam              | Case-control | Both    | N/A       | Biomarker           | Biomarker                                            | Morbidity | NA          | NA      | N/A               | 78    | 50       | Hospital     | Any smoking status | Exact                   |
| Sankaranarayanan | 1991 | Esophageal cancer | Kerala             | Case-control | Both    | 18-99     | Self-report         | Physician diagnosis; Biomarker                       | Morbidity | NA          | NA      | N/A               | NA    | NA       | Hospital     | Any smoking status | Pan with Tobacco        |
| Sharma           | 2013 | Esophageal cancer | Assam              | Case-control | Both    | 15-80     | Self-report         | Biomarker                                            | Morbidity | NA          | NA      | N/A               | 203   | 286      | Community    | Any smoking status | Betel Quid with Tobacco |
| Sharma           | 2013 | Esophageal cancer | Assam              | Case-control | Both    | 18-80     | Self-report         | Biomarker                                            | Morbidity | NA          | NA      | N/A               | 112   | 150      | Community    | Any smoking status | Betel Quid with Tobacco |
| Talukdar         | 2013 | Esophageal cancer | India              | Case-control | Both    | 25-85     | Self-report         | Biomarker                                            | Morbidity | NA          | NA      | N/A               | 112   | 130      | Community    | Any smoking status | Exact                   |

| Author      | Year | Health outcome                                                                                         | Location      | Study design | Sex     | Age range | Exposure assessment | Outcome assessment method       | Endpoint  | Sample size | Exposed | Follow-up (years) | Cases | Controls | Control pool | Smoking status     | Chewing tobacco type |
|-------------|------|--------------------------------------------------------------------------------------------------------|---------------|--------------|---------|-----------|---------------------|---------------------------------|-----------|-------------|---------|-------------------|-------|----------|--------------|--------------------|----------------------|
| Wynder      | 1977 | Esophageal cancer                                                                                      | United States | Case-control | Males   | 20-89     | Self-report         | Biomarker                       | Morbidity | NA          | NA      | N/A               | 264   | 2,560    | Hospital     | Any smoking status | Exact                |
| Znaor       | 2003 | Esophageal cancer                                                                                      | Tamil Nadu    | Case-control | Males   | 25-99     | Biomarker           | Biomarker                       | Morbidity | NA          | NA      | N/A               | 602   | 3453     | Hospital     | Any smoking status | Exact                |
| Gajalakshmi | 2012 | Esophageal cancer; Larynx cancer; Lip and oral cavity cancer; Nasopharynx cancer; Other pharynx cancer | Tamil Nadu    | Case-control | Females | 35-69     | Self-report         | Death certificates; Self-report | Mortality | NA          | NA      | N/A               | 90    | 47,883   | Community    | Non-smokers        | Exact                |
| Gajalakshmi | 2012 | Esophageal cancer; Larynx cancer; Lip and oral cavity cancer; Nasopharynx cancer; Other pharynx cancer | Tamil Nadu    | Case-control | Females | 35-69     | Self-report         | Death certificates; Self-report | Mortality | NA          | NA      | N/A               | 203   | 219,241  | Community    | Non-smokers        | Exact                |
| Gajalakshmi | 2012 | Esophageal cancer; Larynx cancer; Lip and oral cavity cancer; Nasopharynx cancer; Other pharynx cancer | Tamil Nadu    | Case-control | Males   | 35-69     | Self-report         | Death certificates; Self-report | Mortality | NA          | NA      | N/A               | 29    | 23,254   | Community    | Non-smokers        | Exact                |
| Gajalakshmi | 2012 | Esophageal cancer; Larynx cancer; Lip and oral cavity cancer; Nasopharynx cancer; Other pharynx cancer | Tamil Nadu    | Case-control | Males   | 35-69     | Self-report         | Death certificates; Self-report | Mortality | NA          | NA      | N/A               | 134   | 138,928  | Community    | Non-smokers        | Exact                |

| Author      | Year | Health outcome                                                                                         | Location      | Study design       | Sex   | Age range | Exposure assessment | Outcome assessment method                                                | Endpoint              | Sample size | Exposed | Follow-up (years) | Cases | Controls | Control pool        | Smoking status     | Chewing tobacco type    |
|-------------|------|--------------------------------------------------------------------------------------------------------|---------------|--------------------|-------|-----------|---------------------|--------------------------------------------------------------------------|-----------------------|-------------|---------|-------------------|-------|----------|---------------------|--------------------|-------------------------|
| Gupta       | 2020 | Esophageal cancer; Larynx cancer; Lip and oral cavity cancer; Nasopharynx cancer; Other pharynx cancer | Maharashtra   | Case-control       | Both  | 15-99     | Self-report         | Biomarker                                                                | Morbidity             | NA          | NA      | N/A               | 240   | 132      | Hospital            | Any smoking status | Exact                   |
| Gupta       | 2007 | Ischemic heart disease                                                                                 | Rajasthan     | Case-control       | Both  | 23-76     | Self-report         | Physician diagnosis                                                      | N/A                   | NA          | NA      | N/A               | 200   | 200      | Community           | Never smokers      | Exact                   |
| Henley      | 2005 | Ischemic heart disease                                                                                 | United States | Prospective cohort | Males | 30-99     | Self-report         | Death certificates                                                       | N/A                   | 71,503      | 1,841   | 18                | NA    | NA       | N/A                 | Never smokers      | Exact                   |
| Rahman      | 2008 | Ischemic heart disease                                                                                 | Bangladesh    | Case-control       | Both  | 20-49     | Self-report         | Physician diagnosis                                                      | N/A                   | NA          | NA      | N/A               | 69    | 138      | Hospital            | Any smoking status | Betel Quid with Tobacco |
| Rahman      | 2012 | Ischemic heart disease                                                                                 | Bangladesh    | Case-control       | Both  | 40-75     | Self-report         | Physician diagnosis                                                      | N/A                   | NA          | NA      | N/A               | 191   | 1,089    | Community; Hospital | Never smokers      | Jarda                   |
| Ram         | 2012 | Ischemic heart disease                                                                                 | Gujarat       | Case-control       | Both  | 31-99     | Self-report         | Physician diagnosis                                                      | N/A                   | NA          | NA      | N/A               | NA    | NA       | Hospital            | Any smoking status | Exact                   |
| Timberlake  | 2017 | Ischemic heart disease                                                                                 | United States | Prospective cohort | Both  | 15-99     | Self-report         | Death certificates                                                       | N/A                   | 5,856       | NA      | 8.8               | NA    | NA       | N/A                 | Any smoking status | Exact                   |
| Rahman      | 2012 | Ischemic heart disease                                                                                 | Bangladesh    | Case-control       | Both  | 40-75     | Self-report         | Physician diagnosis                                                      | N/A                   | NA          | NA      | N/A               | 162   | 1,089    | Community; Hospital | Never smokers      | Sada-Pata               |
| Gholap      | 2023 | Larynx cancer                                                                                          | India         | Case-control       | Males | 20-69     | Self-report         | Physician diagnosis; Biomarker                                           | Morbidity             | NA          | NA      | N/A               | 6     | 39       | Hospital Visitors   | Any smoking status | Betel Quid with Tobacco |
| Gholap      | 2023 | Larynx cancer                                                                                          | India         | Case-control       | Males | 20-69     | Self-report         | Physician diagnosis; Biomarker                                           | Morbidity             | NA          | NA      | N/A               | 2     | 38       | Hospital Visitors   | Any smoking status | Gutkha                  |
| Gholap      | 2023 | Larynx cancer                                                                                          | India         | Case-control       | Males | 20-69     | Self-report         | Physician diagnosis; Biomarker                                           | Morbidity             | NA          | NA      | N/A               | 9     | 44       | Hospital Visitors   | Any smoking status | Tobacco with Lime       |
| Jayalekshmi | 2013 | Larynx cancer                                                                                          | Kerala, Rural | Prospective cohort | Males | 30-84     | Self-report         | Death certificates; Administrative medical records or disease registries | Incidence & Mortality | NA          | 18,568  | 13.7              | NA    | NA       | N/A                 | Any smoking status | Exact                   |

| Author           | Year | Health outcome                                                                      | Location           | Study design | Sex   | Age range | Exposure assessment | Outcome assessment method                            | Endpoint  | Sample size | Exposed | Follow-up (years) | Cases | Controls | Control pool       | Smoking status     | Chewing tobacco type    |
|------------------|------|-------------------------------------------------------------------------------------|--------------------|--------------|-------|-----------|---------------------|------------------------------------------------------|-----------|-------------|---------|-------------------|-------|----------|--------------------|--------------------|-------------------------|
| Jussawalla       | 1971 | Larynx cancer                                                                       | Maharashtra, Urban | Case-control | Both  | 18-99     | Self-report         | Administrative medical records or disease registries | Morbidity | NA          | NA      | N/A               | 560   | 2005     | Community          | Non-smokers        | Pan with Tobacco        |
| Kapil            | 2005 | Larynx cancer                                                                       | Delhi              | Case-control | Both  | 18-99     | Self-report         | Physician diagnosis; Biomarker                       | Morbidity | NA          | NA      | N/A               | 305   | 305      | Hospital           | Any smoking status | Exact                   |
| Kapil            | 2005 | Larynx cancer                                                                       | Delhi              | Case-control | Both  | 18-99     | Self-report         | Physician diagnosis; Biomarker                       | Morbidity | NA          | NA      | N/A               | 305   | 305      | Hospital           | Any smoking status | Betel Quid with Tobacco |
| Notani           | 1988 | Larynx cancer                                                                       | Maharashtra        | Case-control | Males | 15-99     | Self-report         | Administrative medical records or disease registries | Morbidity | NA          | NA      | N/A               | 80    | 215      | Hospital           | Non-smokers        | Exact                   |
| Rao              | 1999 | Larynx cancer                                                                       | Maharashtra        | Case-control | Males | 18-99     | Self-report         | Physician diagnosis                                  | Morbidity | NA          | NA      | N/A               | 427   | 631      | Hospital           | Any smoking status | Exact                   |
| Sankaranarayanan | 1990 | Larynx cancer                                                                       | Kerala             | Case-control | Males | 18-99     | Self-report         | Biomarker                                            | Morbidity | NA          | NA      | N/A               | 191   | 546      | Hospital           | Any smoking status | Pan with Tobacco        |
| Sapkota          | 2007 | Larynx cancer                                                                       | Gujarat            | Case-control | Both  | 18-99     | Self-report         | Administrative medical records or disease registries | Morbidity | NA          | NA      | N/A               | NA    | NA       | Hospital; Visitors | Any smoking status | Exact                   |
| Wynder           | 1977 | Larynx cancer                                                                       | United States      | Case-control | Males | 20-89     | Self-report         | Biomarker                                            | Morbidity | NA          | NA      | N/A               | 467   | 2,560    | Hospital           | Any smoking status | Exact                   |
| Wyss             | 2016 | Larynx cancer                                                                       | Iowa               | Case-control | Both  | 17-94     | Self-report         | Administrative medical records or disease registries | Morbidity | NA          | NA      | N/A               | 1092  | 2922     | Hospital           | Ever smokers       | Exact                   |
| Akhtar           | 2016 | Larynx cancer; Lip and oral cavity cancer; Nasopharynx cancer; Other pharynx cancer | Punjab             | Case-control | Both  | 18-99     | Self-report         | Physician diagnosis                                  | Morbidity | NA          | NA      | N/A               | 300   | 300      | Relatives          | Any smoking status | Exact                   |



| Author   | Year | Health outcome                                                                      | Location      | Study design | Sex   | Age range | Exposure assessment | Outcome assessment method | Endpoint  | Sample size | Exposed | Follow-up (years) | Cases | Controls | Control pool | Smoking status     | Chewing tobacco type |
|----------|------|-------------------------------------------------------------------------------------|---------------|--------------|-------|-----------|---------------------|---------------------------|-----------|-------------|---------|-------------------|-------|----------|--------------|--------------------|----------------------|
| Anuradha | 2019 | Larynx cancer; Lip and oral cavity cancer; Nasopharynx cancer; Other pharynx cancer | India         | Case-control | Both  | 21-80     | Self-report         | Biomarker                 | Morbidity | NA          | NA      | N/A               | 105   | 110      | Hospital     | Any smoking status | Exact                |
| Ruwali   | 2011 | Larynx cancer; Lip and oral cavity cancer; Nasopharynx cancer; Other pharynx cancer | Uttar Pradesh | Case-control | Males | 18-99     | Self-report         | Biomarker                 | Morbidity | NA          | NA      | N/A               | 500   | 500      | Clinics      | Any smoking status | Exact                |
| Sam      | 2010 | Larynx cancer; Lip and oral cavity cancer; Nasopharynx cancer; Other pharynx cancer | Tamil Nadu    | Case-control | Both  | 18-99     | Biomarker           | Biomarker                 | Morbidity | NA          | NA      | N/A               | 408   | 220      | Community    | Any smoking status | Exact                |
| Sam      | 2007 | Larynx cancer; Lip and oral cavity cancer; Nasopharynx cancer; Other pharynx cancer | Tamil Nadu    | Case-control | Both  | 18-99     | Biomarker           | Biomarker                 | Morbidity | NA          | NA      | N/A               | 219   | 210      | Hospital     | Any smoking status | Exact                |
| Singh    | 2009 | Larynx cancer; Lip and oral cavity cancer; Nasopharynx cancer; Other pharynx cancer | Uttar Pradesh | Case-control | Males | 15-99     | Self-report         | Biomarker                 | Morbidity | NA          | NA      | N/A               | 200   | 200      | Hospital     | Any smoking status | Exact                |
| Singh    | 2008 | Larynx cancer; Lip and oral cavity cancer; Nasopharynx cancer; Other pharynx cancer | Uttar Pradesh | Case-control | Males | 15-99     | Self-report         | Biomarker                 | Morbidity | NA          | NA      | N/A               | 78    | 152      | Hospital     | Non-smokers        | Exact                |

| Author       | Year | Health outcome                                                                      | Location      | Study design | Sex   | Age range | Exposure assessment | Outcome assessment method      | Endpoint  | Sample size | Exposed | Follow-up (years) | Cases | Controls | Control pool      | Smoking status     | Chewing tobacco type    |
|--------------|------|-------------------------------------------------------------------------------------|---------------|--------------|-------|-----------|---------------------|--------------------------------|-----------|-------------|---------|-------------------|-------|----------|-------------------|--------------------|-------------------------|
| Soya         | 2007 | Larynx cancer; Lip and oral cavity cancer; Nasopharynx cancer; Other pharynx cancer | Tamil Nadu    | Case-control | Both  | 15-99     | Self-report         | Physician diagnosis; Biomarker | Morbidity | NA          | NA      | N/A               | 408   | 220      | Hospital          | Any smoking status | Exact                   |
| Yadav        | 2008 | Larynx cancer; Lip and oral cavity cancer; Nasopharynx cancer; Other pharynx cancer | Uttar Pradesh | Case-control | Males | 15-99     | Self-report         | Biomarker                      | Morbidity | NA          | NA      | N/A               | 157   | 228      | Community         | Non-smokers        | Exact                   |
| Choudhury    | 2015 | Larynx cancer; Lip and oral cavity cancer; Nasopharynx cancer; Other pharynx cancer | Assam         | Case-control | Both  | 18-99     | Self-report         | Biomarker                      | Morbidity | NA          | NA      | N/A               | 180   | 240      | Community         | Any smoking status | Betel Quid with Tobacco |
| Chang        | 2020 | Larynx cancer; Lip and oral cavity cancer; Other pharynx cancer                     | Nepal         | Case-control | Both  | 18-99     | Self-report         | Physician diagnosis            | Morbidity | NA          | NA      | N/A               | 549   | 601      | N/A               | Any smoking status | Zarda                   |
| Ruwali       | 2009 | Larynx cancer; Lip and oral cavity cancer; Other pharynx cancer                     | Uttar Pradesh | Case-control | Males | 18-99     | Biomarker           | Physician diagnosis; Biomarker | Morbidity | NA          | NA      | N/A               | 350   | 350      | Clinics           | Any smoking status | Exact                   |
| Basu         | 2008 | Larynx cancer; Lip and oral cavity cancer;                                          | West Bengal   | Case-control | Both  | 35-68     | Biomarker           | Biomarker                      | Morbidity | NA          | NA      | N/A               | 110   | 110      | Hospital          | Any smoking status | Gutkha                  |
| Akram        | 2013 | Lip and oral cavity cancer                                                          | Sindh         | Case-control | Both  | 22-80     | Self-report         | Physician diagnosis; Biomarker | Morbidity | NA          | NA      | N/A               | NA    | NA       | Hospital Visitors | Any smoking status | Exact                   |
| Amtha        | 2014 | Lip and oral cavity cancer                                                          | Jakarta       | Case-control | Both  | 20-99     | Self-report         | Biomarker                      | Morbidity | NA          | NA      | N/A               | 81    | 162      | Hospital          | Any smoking status | Betel Quid with Tobacco |
| Anantharaman | 2007 | Lip and oral cavity cancer                                                          | Maharashtra   | Case-control | Both  | 18-84     | Self-report         | Biomarker                      | Morbidity | NA          | NA      | N/A               | 458   | 729      | Hospital          | Never smokers      | Exact                   |

| Author       | Year | Health outcome             | Location       | Study design | Sex     | Age range | Exposure assessment | Outcome assessment method                            | Endpoint  | Sample size | Exposed | Follow-up (years) | Cases | Controls | Control pool | Smoking status     | Chewing tobacco type    |
|--------------|------|----------------------------|----------------|--------------|---------|-----------|---------------------|------------------------------------------------------|-----------|-------------|---------|-------------------|-------|----------|--------------|--------------------|-------------------------|
| Anantharaman | 2007 | Lip and oral cavity cancer | Maharashtra    | Case-control | Both    | 18-84     | Self-report         | Biomarker                                            | Morbidity | NA          | NA      | N/A               | 458   | 729      | Hospital     | Current smokers    | Exact                   |
| Arain        | 2015 | Lip and oral cavity cancer | Sindh          | Case-control | Females | 30-60     | Self-report         | Biomarker                                            | Morbidity | NA          | NA      | N/A               | NA    | NA       | Relatives    | Any smoking status | Gutkha                  |
| Arain        | 2015 | Lip and oral cavity cancer | Sindh          | Case-control | Females | 30-60     | Self-report         | Biomarker                                            | Morbidity | NA          | NA      | N/A               | NA    | NA       | Relatives    | Any smoking status | Mainpuri                |
| Arain        | 2015 | Lip and oral cavity cancer | Sindh          | Case-control | Males   | 30-60     | Self-report         | Biomarker                                            | Morbidity | NA          | NA      | N/A               | NA    | NA       | Relatives    | Any smoking status | Gutkha                  |
| Arain        | 2015 | Lip and oral cavity cancer | Sindh          | Case-control | Males   | 30-60     | Self-report         | Biomarker                                            | Morbidity | NA          | NA      | N/A               | NA    | NA       | Relatives    | Any smoking status | Mainpuri                |
| Awan         | 2016 | Lip and oral cavity cancer | Sindh          | Case-control | Both    | 18-99     | Self-report         | Biomarker                                            | Morbidity | NA          | NA      | N/A               | 134   | 134      | Hospital     | Any smoking status | Betel Quid with Tobacco |
| Awan         | 2016 | Lip and oral cavity cancer | Sindh          | Case-control | Both    | 18-99     | Self-report         | Biomarker                                            | Morbidity | NA          | NA      | N/A               | 134   | 134      | Hospital     | Any smoking status | Exact                   |
| Awan         | 2016 | Lip and oral cavity cancer | Sindh          | Case-control | Both    | 18-99     | Self-report         | Biomarker                                            | Morbidity | NA          | NA      | N/A               | 134   | 134      | Hospital     | Any smoking status | Gutkha                  |
| Awan         | 2016 | Lip and oral cavity cancer | Sindh          | Case-control | Both    | 18-99     | Self-report         | Biomarker                                            | Morbidity | NA          | NA      | N/A               | 134   | 134      | Hospital     | Any smoking status | Mainpuri                |
| Awan         | 2016 | Lip and oral cavity cancer | Sindh          | Case-control | Both    | 18-99     | Self-report         | Biomarker                                            | Morbidity | NA          | NA      | N/A               | 134   | 134      | Hospital     | Any smoking status | Supari                  |
| Balaram      | 2002 | Lip and oral cavity cancer | India          | Case-cohort  | Males   | 20-85     | Self-report         | Biomarker                                            | Incidence | NA          | NA      | 2.8               | 266   | 269      | Hospital     | Any smoking status | Pan with Tobacco        |
| Balaram      | 2002 | Lip and oral cavity cancer | India          | Case-cohort  | Females | 18-87     | Self-report         | Biomarker                                            | Incidence | NA          | NA      | 2.8               | 251   | 280      | Hospital     | Any smoking status | Pan with Tobacco        |
| Buch         | 2002 | Lip and oral cavity cancer | Maharashtra    | Case-control | Both    | 15-99     | Self-report         | Physician diagnosis                                  | Morbidity | NA          | NA      | N/A               | 285   | 426      | Community    | Any smoking status | Betel Quid with Tobacco |
| Bundgaard    | 1995 | Lip and oral cavity cancer | Denmark        | Case-control | Both    | 18-99     | Self-report         | Physician diagnosis; Biomarker                       | Morbidity | NA          | NA      | N/A               | 161   | 398      | Community    | Any smoking status | Exact                   |
| Dikshit      | 2000 | Lip and oral cavity cancer | Madhya Pradesh | Case-control | Males   | 18-99     | Self-report         | Administrative medical records or disease registries | Morbidity | NA          | NA      | N/A               | NA    | NA       | Community    | Any smoking status | Exact                   |

| Author      | Year | Health outcome             | Location      | Study design       | Sex     | Age range | Exposure assessment | Outcome assessment method                            | Endpoint  | Sample size | Exposed | Follow-up (years) | Cases | Controls | Control pool      | Smoking status     | Chewing tobacco type    |
|-------------|------|----------------------------|---------------|--------------------|---------|-----------|---------------------|------------------------------------------------------|-----------|-------------|---------|-------------------|-------|----------|-------------------|--------------------|-------------------------|
| Edirisinghe | 2022 | Lip and oral cavity cancer | Sri Lanka     | Case-control       | Both    | 35-85     | Self-report         | Physician diagnosis; Biomarker                       | Morbidity | NA          | NA      | N/A               | 33    | 35       | Community         | Any smoking status | Betel Quid with Tobacco |
| Gholap      | 2023 | Lip and oral cavity cancer | India         | Case-control       | Males   | 20-69     | Self-report         | Physician diagnosis; Biomarker                       | Morbidity | NA          | NA      | N/A               | 68    | 39       | Hospital Visitors | Any smoking status | Betel Quid with Tobacco |
| Gholap      | 2023 | Lip and oral cavity cancer | India         | Case-control       | Males   | 20-69     | Self-report         | Physician diagnosis; Biomarker                       | Morbidity | NA          | NA      | N/A               | 121   | 38       | Hospital Visitors | Any smoking status | Gutkha                  |
| Gholap      | 2023 | Lip and oral cavity cancer | India         | Case-control       | Males   | 20-69     | Self-report         | Physician diagnosis; Biomarker                       | Morbidity | NA          | NA      | N/A               | 117   | 44       | Hospital Visitors | Any smoking status | Tobacco with Lime       |
| Goud        | 1990 | Lip and oral cavity cancer | Bihar         | Case-control       | Both    | 40-59     | Self-report         | Administrative medical records or disease registries | Morbidity | NA          | NA      | N/A               | NA    | NA       | Hospital          | Any smoking status | Exact                   |
| Gupta       | 2017 | Lip and oral cavity cancer | Maharashtra   | Case-control       | Both    | 30-80     | Self-report         | Biomarker                                            | Morbidity | NA          | NA      | N/A               | 187   | 240      | Hospital          | Any smoking status | Exact                   |
| Gupta       | 2014 | Lip and oral cavity cancer | Uttar Pradesh | Case-control       | Both    | 15-65     | Self-report         | Physician diagnosis                                  | Morbidity | NA          | NA      | N/A               | 66    | 48       | Hospital          | Any smoking status | Exact                   |
| Herrero     | 2003 | Lip and oral cavity cancer | Karnataka     | Case-control       | Both    | 18-99     | Self-report         | Administrative medical records or disease registries | Morbidity | NA          | NA      | N/A               | 540   | 575      | Hospital          | Any smoking status | Pan with Tobacco        |
| Ihsan       | 2011 | Lip and oral cavity cancer | India         | Case-control       | Both    | 18-99     | Self-report         | Biomarker                                            | Morbidity | NA          | NA      | N/A               | 116   | 278      | Relatives         | Any smoking status | Exact                   |
| Imam        | 2021 | Lip and oral cavity cancer | Punjab        | Case-control       | Both    | 18-99     | Self-report         | Administrative medical records or disease registries | Morbidity | NA          | NA      | N/A               | 94    | 107      | Unknown           | Never smokers      | Gutkha                  |
| Jayalekshmi | 2009 | Lip and oral cavity cancer | Kerala, Rural | Prospective cohort | Females | 30-84     | Self-report         | Administrative medical records or disease registries | Incidence | 78,140      | NA      | 15                | NA    | NA       | N/A               | Any smoking status | Exact                   |

| Author       | Year | Health outcome             | Location           | Study design       | Sex     | Age range | Exposure assessment | Outcome assessment method                            | Endpoint  | Sample size | Exposed | Follow-up (years) | Cases | Controls | Control pool        | Smoking status     | Chewing tobacco type    |
|--------------|------|----------------------------|--------------------|--------------------|---------|-----------|---------------------|------------------------------------------------------|-----------|-------------|---------|-------------------|-------|----------|---------------------|--------------------|-------------------------|
| Jayalekshmi  | 2011 | Lip and oral cavity cancer | Kerala, Rural      | Prospective cohort | Males   | 30-84     | Self-report         | Physician diagnosis; Death certificates              | Incidence | 66,277      | 18,692  | 15                | NA    | NA       | N/A                 | Any smoking status | Exact                   |
| Jussawalla   | 1971 | Lip and oral cavity cancer | Maharashtra, Urban | Case-control       | Both    | 18-99     | Self-report         | Administrative medical records or disease registries | Morbidity | NA          | NA      | N/A               | 1464  | 2005     | Community           | Non-smokers        | Pan with Tobacco        |
| Kazi         | 2010 | Lip and oral cavity cancer | Sindh              | Case-control       | Females | 35-65     | Self-report         | Biomarker                                            | Morbidity | NA          | NA      | N/A               | 82    | 88       | Unknown             | Non-smokers        | Exact                   |
| Kietthubthew | 2001 | Lip and oral cavity cancer | Thailand           | Case-control       | Both    | N/A       | Self-report         | Administrative medical records or disease registries | Morbidity | NA          | NA      | N/A               | NA    | NA       | Community           | Any smoking status | Betel Quid with Tobacco |
| Krishna      | 2014 | Lip and oral cavity cancer | Uttar Pradesh      | Case-control       | Both    | 18-99     | Self-report         | Biomarker                                            | Morbidity | NA          | NA      | N/A               | 190   | 189      | Hospital            | Non-smokers        | Exact                   |
| Lakhanpal    | 2014 | Lip and oral cavity cancer | India              | Case-control       | Both    | 18-99     | Self-report         | Biomarker                                            | Morbidity | NA          | NA      | N/A               | 125   | 207      | Relatives           | Any smoking status | Exact                   |
| Lohe         | 2010 | Lip and oral cavity cancer | Maharashtra        | Case-control       | Both    | 18-80     | Self-report         | Physician diagnosis; Biomarker                       | Morbidity | NA          | NA      | N/A               | NA    | NA       | Hospital            | Any smoking status | Betel Quid with Tobacco |
| Lohe         | 2010 | Lip and oral cavity cancer | Maharashtra        | Case-control       | Both    | 18-80     | Self-report         | Physician diagnosis; Biomarker                       | Morbidity | NA          | NA      | N/A               | NA    | NA       | Hospital            | Any smoking status | Exact                   |
| Madani       | 2010 | Lip and oral cavity cancer | Maharashtra        | Case-control       | Both    | 18-99     | Self-report         | Physician diagnosis; Biomarker                       | Morbidity | NA          | NA      | N/A               | 350   | 350      | Relatives; Visitors | Any smoking status | Gutkha                  |
| Madani       | 2010 | Lip and oral cavity cancer | Maharashtra        | Case-control       | Both    | 18-99     | Self-report         | Physician diagnosis; Biomarker                       | Morbidity | NA          | NA      | N/A               | 350   | 350      | Relatives; Visitors | Any smoking status | Tobacco Flakes          |
| Mahapatra    | 2015 | Lip and oral cavity cancer | Karnataka          | Case-control       | Both    | 18-83     | Self-report         | Physician diagnosis; Biomarker                       | Morbidity | NA          | NA      | N/A               | 134   | 268      | Hospital            | Any smoking status | Gutkha                  |
| Mahapatra    | 2015 | Lip and oral cavity cancer | Karnataka          | Case-control       | Both    | 18-83     | Self-report         | Physician diagnosis; Biomarker                       | Morbidity | NA          | NA      | N/A               | 134   | 268      | Hospital            | Any smoking status | Exact                   |

| Author           | Year | Health outcome             | Location    | Study design        | Sex   | Age range | Exposure assessment | Outcome assessment method                                       | Endpoint  | Sample size | Exposed | Follow-up (years) | Cases | Controls | Control pool | Smoking status     | Chewing tobacco type |
|------------------|------|----------------------------|-------------|---------------------|-------|-----------|---------------------|-----------------------------------------------------------------|-----------|-------------|---------|-------------------|-------|----------|--------------|--------------------|----------------------|
| Mekala           | 2020 | Lip and oral cavity cancer | Telangana   | Case-control        | Both  | 18-99     | Self-report         | Biomarker                                                       | Morbidity | NA          | NA      | N/A               | 500   | 500      | Hospital     | Any smoking status | Exact                |
| Merchant         | 2000 | Lip and oral cavity cancer | Sindh       | Case-control        | Both  | 18-80     | Self-report         | Physician diagnosis; Biomarker                                  | Morbidity | NA          | NA      | N/A               | 79    | 149      | Hospital     | Any smoking status | Pan with Tobacco     |
| Merchant         | 2015 | Lip and oral cavity cancer | Sindh       | Case-control        | Both  | 18-99     | Biomarker           | Biomarker                                                       | Morbidity | NA          | NA      | N/A               | 79    | 143      | Hospital     | Any smoking status | Pan with Tobacco     |
| Muwonge          | 2008 | Lip and oral cavity cancer | Kerala      | Nested case-control | Both  | 35-99     | Self-report         | Physician diagnosis; Biomarker                                  | Incidence | NA          | NA      | 8                 | 282   | 1,410    | Community    | Any smoking status | Exact                |
| Nandakumar       | 1990 | Lip and oral cavity cancer | Karnataka   | Case-control        | Both  | 15-99     | Self-report         | Biomarker                                                       | Morbidity | NA          | NA      | N/A               | 348   | 348      | Hospital     | Any smoking status | Pan with Tobacco     |
| Ngelangel        | 2009 | Lip and oral cavity cancer | Philippines | Case-control        | Both  | N/A       | Self-report         | Administrative medical records or disease registries            | Morbidity | NA          | NA      | N/A               | 176   | 317      | Hospital     | Any smoking status | Exact                |
| Notani           | 1988 | Lip and oral cavity cancer | Maharashtra | Case-control        | Males | 15-99     | Self-report         | Administrative medical records or disease registries            | Morbidity | NA          | NA      | N/A               | 278   | 215      | Hospital     | Non-smokers        | Exact                |
| Radoi            | 2013 | Lip and oral cavity cancer | France      | Case-control        | Both  | 18-75     | Self-report         | Physician diagnosis; Biomarker                                  | Morbidity | NA          | NA      | N/A               | 772   | 3,555    | Community    | Any smoking status | Exact                |
| Rao              | 1994 | Lip and oral cavity cancer | Maharashtra | Case-control        | Males | 18-99     | Biomarker           | Biomarker; Administrative medical records or disease registries | N/A       | NA          | NA      | N/A               | 713   | 635      | Hospital     | Any smoking status | Exact                |
| Rao              | 1998 | Lip and oral cavity cancer | Maharashtra | Case-control        | Males | 25-87     | Self-report         | Physician diagnosis                                             | Morbidity | NA          | NA      | N/A               | 617   | 615      | Hospital     | Any smoking status | Exact                |
| Ray              | 2013 | Lip and oral cavity cancer | West Bengal | Case-control        | Both  | 10-99     | Self-report         | Physician diagnosis; Biomarker                                  | Morbidity | NA          | NA      | N/A               | NA    | NA       | Hospital     | Any smoking status | Exact                |
| Sankaranarayanan | 1989 | Lip and oral cavity cancer | Kerala      | Case-control        | Both  | 18-99     | Self-report         | Physician diagnosis; Biomarker                                  | Morbidity | NA          | NA      | N/A               | NA    | NA       | Hospital     | Any smoking status | Pan with Tobacco     |

| Author           | Year | Health outcome             | Location      | Study design | Sex   | Age range | Exposure assessment | Outcome assessment method                            | Endpoint  | Sample size | Exposed | Follow-up (years) | Cases | Controls | Control pool      | Smoking status     | Chewing tobacco type    |
|------------------|------|----------------------------|---------------|--------------|-------|-----------|---------------------|------------------------------------------------------|-----------|-------------|---------|-------------------|-------|----------|-------------------|--------------------|-------------------------|
| Sankaranarayanan | 1990 | Lip and oral cavity cancer | Kerala        | Case-control | Both  | 15-99     | Self-report         | Administrative medical records or disease registries | Morbidity | NA          | NA      | N/A               | 402   | 886      | Hospital          | Any smoking status | Pan with Tobacco        |
| Sankaranarayanan | 1989 | Lip and oral cavity cancer | Kerala        | Case-control | Both  | 18-99     | Self-report         | Administrative medical records or disease registries | Morbidity | NA          | NA      | N/A               | NA    | NA       | Hospital          | Any smoking status | Pan with Tobacco        |
| Sharma           | 2019 | Lip and oral cavity cancer | Delhi         | Case-control | Both  | 18-99     | Self-report         | Biomarker                                            | Morbidity | NA          | NA      | N/A               | 100   | 150      | Hospital          | Any smoking status | Exact                   |
| Sikdar           | 2004 | Lip and oral cavity cancer | West Bengal   | Case-control | Both  | 15-99     | Self-report         | Physician diagnosis                                  | Morbidity | NA          | NA      | N/A               | 112   | 144      | Hospital          | Current smokers    | Exact                   |
| Singh            | 2014 | Lip and oral cavity cancer | Gujarat       | Case-control | Both  | N/A       | Self-report         | Physician diagnosis; Biomarker                       | Morbidity | NA          | NA      | N/A               | 200   | 200      | Hospital; Visitor | Never smokers      | Exact                   |
| Subapriya        | 2007 | Lip and oral cavity cancer | Tamil Nadu    | Case-control | Both  | 30-75     | Self-report         | Administrative medical records or disease registries | Morbidity | NA          | NA      | N/A               | 251   | 289      | Relatives         | Any smoking status | Exact                   |
| Subapriya        | 2007 | Lip and oral cavity cancer | Tamil Nadu    | Case-control | Both  | 30-75     | Self-report         | Administrative medical records or disease registries | Morbidity | NA          | NA      | N/A               | 202   | 266      | Relatives         | Any smoking status | Betel Quid with Tobacco |
| Wynder           | 1977 | Lip and oral cavity cancer | United States | Case-control | Males | 20-89     | Self-report         | Biomarker                                            | Morbidity | NA          | NA      | N/A               | NA    | NA       | Hospital          | Any smoking status | Exact                   |
| Wyss             | 2016 | Lip and oral cavity cancer | Iowa          | Case-control | Both  | 17-84     | Self-report         | Administrative medical records or disease registries | Morbidity | NA          | NA      | N/A               | 1771  | 4626     | Hospital          | Ever smokers       | Exact                   |
| Wyss             | 2016 | Lip and oral cavity cancer | Iowa          | Case-control | Both  | 17-94     | Self-report         | Administrative medical records or disease registries | Morbidity | NA          | NA      | N/A               | 461   | 3018     | Hospital          | Never smokers      | Exact                   |
| Yadav            | 2010 | Lip and oral cavity cancer | Assam         | Case-control | Both  | 15-99     | Self-report         | Biomarker                                            | Morbidity | NA          | NA      | N/A               | 136   | 270      | Caretakers        | Any smoking status | Exact                   |

| Author       | Year | Health outcome                                                       | Location                 | Study design | Sex   | Age range | Exposure assessment | Outcome assessment method                                       | Endpoint  | Sample size | Exposed | Follow-up (years) | Cases | Controls | Control pool     | Smoking status     | Chewing tobacco type    |
|--------------|------|----------------------------------------------------------------------|--------------------------|--------------|-------|-----------|---------------------|-----------------------------------------------------------------|-----------|-------------|---------|-------------------|-------|----------|------------------|--------------------|-------------------------|
| Znaor        | 2003 | Lip and oral cavity cancer                                           | Tamil Nadu               | Case-control | Males | 25-99     | Biomarker           | Biomarker                                                       | Morbidity | NA          | NA      | N/A               | 757   | 374      | Hospital         | Any smoking status | Exact                   |
| Anantharaman | 2014 | Lip and oral cavity cancer; Other pharynx cancer                     | India                    | Case-control | Both  | 18-99     | Self-report         | Biomarker                                                       | Morbidity | NA          | NA      | N/A               | 3453  | 602      | Hospital         | Never smokers      | Exact                   |
| Dholam       | 2016 | Lip and oral cavity cancer; Other pharynx cancer                     | India                    | Case-control | Both  | 18-45     | Self-report         | Physician diagnosis                                             | Morbidity | NA          | NA      | N/A               | 53    | 70       | Hospital         | Never smokers      | Exact                   |
| Jafarey      | 1977 | Lip and oral cavity cancer; Other pharynx cancer                     | Sindh                    | Case-control | Both  | 18-99     | Self-report         | Physician diagnosis; Biomarker                                  | Morbidity | NA          | NA      | N/A               | NA    | NA       | Community        | Non-smokers        | Exact                   |
| Jafarey      | 1977 | Lip and oral cavity cancer; Other pharynx cancer                     | Sindh                    | Case-control | Both  | 18-99     | Self-report         | Physician diagnosis; Biomarker                                  | Morbidity | NA          | NA      | N/A               | NA    | NA       | Community        | Current smokers    | Exact                   |
| Kabat        | 1994 | Lip and oral cavity cancer; Other pharynx cancer                     | United States of America | Case-control | Males | 18-80     | Self-report         | Biomarker; Administrative medical records or disease registries | Morbidity | NA          | NA      | N/A               | 82    | 448      | Hospital         | Never smokers      | Exact                   |
| KrishnaRao   | 2015 | Lip and oral cavity cancer; Other pharynx cancer                     | Karnataka                | Case-control | Both  | 18-99     | Self-report         | Biomarker                                                       | Morbidity | NA          | NA      | N/A               | 180   | 272      | Patient Visitors | Any smoking status | Betel Quid with Tobacco |
| Mashberg     | 1993 | Lip and oral cavity cancer; Other pharynx cancer                     | New Jersey               | Case-control | Males | 37-80     | Self-report         | Physician diagnosis; Biomarker                                  | Morbidity | NA          | NA      | N/A               | 359   | 2,280    | Hospital         | Any smoking status | Exact                   |
| Wyss         | 2016 | Lip and oral cavity cancer; Other pharynx cancer; Nasopharynx cancer | Iowa                     | Case-control | Both  | 17-94     | Self-report         | Administrative medical records or disease registries            | Morbidity | NA          | NA      | N/A               | NA    |          | Hospital         | Ever smokers       | Exact                   |



| Author     | Year | Health outcome                                                                                     | Location           | Study design | Sex     | Age range | Exposure assessment | Outcome assessment method                            | Endpoint  | Sample size | Exposed | Follow-up (years) | Cases | Controls | Control pool        | Smoking status     | Chewing tobacco type |
|------------|------|----------------------------------------------------------------------------------------------------|--------------------|--------------|---------|-----------|---------------------|------------------------------------------------------|-----------|-------------|---------|-------------------|-------|----------|---------------------|--------------------|----------------------|
| Wyss       | 2016 | Lip and oral cavity cancer; Other pharynx cancer; Nasopharynx cancer                               | Iowa               | Case-control | Both    | 17-94     | Self-report         | Administrative medical records or disease registries | Morbidity | NA          | NA      | N/A               | NA    | NA       | Hospital            | Never smokers      | Exact                |
| Teo        | 2006 | Myocardial infarction (MI)                                                                         | Global             | Case-control | Both    | 15-99     | Self-report         | Physician diagnosis; Biomarker                       | N/A       | NA          | NA      | N/A               | NA    | NA       | Community; Hospital | Any smoking status | Exact                |
| Panwar     | 2011 | Myocardial infarction (MI); Unstable angina; ST-elevation MI (STEMI); Non-ST-elevation MI (NSTEMI) | Rajasthan          | Case-control | Both    | 15-55     | Self-report         | Physician diagnosis                                  | N/A       | NA          | NA      | N/A               | 165   | 199      | Hospital            | Any smoking status | Exact                |
| Chelleng   | 2000 | Nasopharynx cancer                                                                                 | Nagaland           | Case-control | Both    | 18-99     | Self-report         | Biomarker                                            | Morbidity | NA          | NA      | N/A               | 47    | 94       | Community           | Any smoking status | Exact                |
| Jussawalla | 1971 | Nasopharynx cancer                                                                                 | Maharashtra, Urban | Case-control | Both    | 18-99     | Self-report         | Administrative medical records or disease registries | Morbidity | NA          | NA      | N/A               | 17    | 2005     | Community           | Non-smokers        | Pan with Tobacco     |
| Arain      | 2015 | Nasopharynx cancer; Other pharynx cancer                                                           | Sindh              | Case-control | Females | 30-60     | Self-report         | Biomarker                                            | Morbidity | NA          | NA      | N/A               | 43    | 120      | Relatives           | Any smoking status | Gutkha               |
| Arain      | 2015 | Nasopharynx cancer; Other pharynx cancer                                                           | Sindh              | Case-control | Females | 30-60     | Self-report         | Biomarker                                            | Morbidity | NA          | NA      | N/A               | 46    | 98       | Relatives           | Any smoking status | Mainpuri             |
| Arain      | 2015 | Nasopharynx cancer; Other pharynx cancer                                                           | Sindh              | Case-control | Males   | 30-60     | Self-report         | Biomarker                                            | Morbidity | NA          | NA      | N/A               | 49    | 158      | Relatives           | Any smoking status | Gutkha               |
| Arain      | 2015 | Nasopharynx cancer; Other pharynx cancer                                                           | Sindh              | Case-control | Males   | 30-60     | Self-report         | Biomarker                                            | Morbidity | NA          | NA      | N/A               | 57    | 209      | Relatives           | Any smoking status | Mainpuri             |

| Author      | Year | Health outcome                                                                                         | Location       | Study design       | Sex   | Age range | Exposure assessment | Outcome assessment method                                                | Endpoint              | Sample size | Exposed | Follow-up (years) | Cases | Controls | Control pool | Smoking status     | Chewing tobacco type |
|-------------|------|--------------------------------------------------------------------------------------------------------|----------------|--------------------|-------|-----------|---------------------|--------------------------------------------------------------------------|-----------------------|-------------|---------|-------------------|-------|----------|--------------|--------------------|----------------------|
| Notani      | 1988 | Larynx cancer; esophageal Cancer; Lip and oral cavity cancer; Nasopharynx cancer; Other pharynx cancer | Maharashtra    | Case-control       | Males | 15-99     | Self-report         | Administrative medical records or disease registries                     | Morbidity             | NA          | NA      | N/A               | 225   | 215      | Hospital     | Non-smokers        | Exact                |
| Wyss        | 2016 | Nasopharynx cancer; Other pharynx cancer                                                               | Iowa           | Case-control       | Both  | 17-94     | Self-report         | Administrative medical records or disease registries                     | Morbidity             | NA          | NA      | N/A               | NA    | NA       | Hospital     | Ever smokers       | Exact                |
| Wyss        | 2016 | Nasopharynx cancer; Other pharynx cancer                                                               | Iowa           | Case-control       | Both  | 17-94     | Self-report         | Administrative medical records or disease registries                     | Morbidity             | NA          | NA      | N/A               | NA    | NA       | Hospital     | Never smokers      | Exact                |
| Znaor       | 2003 | Nasopharynx cancer; Other pharynx cancer                                                               | Tamil Nadu     | Case-control       | Males | 25-99     | Biomarker           | Biomarker                                                                | Morbidity             | NA          | NA      | N/A               | NA    | NA       | Hospital     | Any smoking status | Exact                |
| Dikshit     | 2000 | Other pharynx cancer                                                                                   | Madhya Pradesh | Case-control       | Males | 18-99     | Self-report         | Administrative medical records or disease registries                     | Morbidity             | NA          | NA      | N/A               | NA    | NA       | Community    | Any smoking status | Exact                |
| Herrero     | 2003 | Other pharynx cancer                                                                                   | Karnataka      | Case-control       | Both  | 18-99     | Self-report         | Administrative medical records or disease registries                     | Morbidity             | NA          | NA      | N/A               | 33    | 575      | Hospital     | Any smoking status | Pan with Tobacco     |
| Jayalekshmi | 2013 | Other pharynx cancer                                                                                   | Kerala, Rural  | Prospective cohort | Males | 30-84     | Self-report         | Death certificates; Administrative medical records or disease registries | Incidence & Mortality | NA          | 18,568  | 13.7              | NA    | NA       | N/A          | Any smoking status | Exact                |

| Author      | Year | Health outcome       | Location           | Study design | Sex   | Age range | Exposure assessment | Outcome assessment method                            | Endpoint  | Sample size | Exposed | Follow-up (years) | Cases | Controls | Control pool       | Smoking status     | Chewing tobacco type    |
|-------------|------|----------------------|--------------------|--------------|-------|-----------|---------------------|------------------------------------------------------|-----------|-------------|---------|-------------------|-------|----------|--------------------|--------------------|-------------------------|
| Jussawalla  | 1971 | Other pharynx cancer | Maharashtra, Urban | Case-control | Both  | 18-99     | Self-report         | Administrative medical records or disease registries | Morbidity | NA          | NA      | N/A               | 70    | 2005     | Community          | Non-smokers        | Pan with Tobacco        |
| Rao         | 1999 | Other pharynx cancer | Maharashtra        | Case-control | Males | 18-99     | Self-report         | Physician diagnosis                                  | Morbidity | NA          | NA      | N/A               | 593   | 631      | Hospital           | Any smoking status | Exact                   |
| Rao         | 1999 | Other pharynx cancer | Maharashtra        | Case-control | Males | 18-99     | Self-report         | Physician diagnosis                                  | Morbidity | NA          | NA      | N/A               | 678   | 631      | Hospital           | Any smoking status | Exact                   |
| Sapkota     | 2007 | Other pharynx cancer | Gujarat            | Case-control | Both  | 18-99     | Self-report         | Administrative medical records or disease registries | Morbidity | NA          | NA      | N/A               | NA    | NA       | Hospital; Visitors | Any smoking status | Exact                   |
| Wasnik      | 1998 | Other pharynx cancer | Maharashtra        | Case-control | Both  | 21-99     | Biomarker           | Biomarker                                            | Morbidity | NA          | NA      | N/A               | 123   | 246      | Hospital           | Any smoking status | Exact                   |
| Wyss        | 2016 | Other pharynx cancer | Iowa               | Case-control | Both  | 17-94     | Self-report         | Administrative medical records or disease registries | Morbidity | NA          | NA      | N/A               | NA    | NA       | Hospital           | Ever smokers       | Exact                   |
| Wyss        | 2016 | Other pharynx cancer | Iowa               | Case-control | Both  | 17-94     | Self-report         | Administrative medical records or disease registries | Morbidity | NA          | NA      | N/A               | NA    | NA       | Hospital           | Never smokers      | Exact                   |
| Agashe      | 2013 | Stroke (unspecified) | Maharashtra        | Case-control | Males | 15-99     | Self-report         | Physician diagnosis                                  | Morbidity | NA          | NA      | N/A               | 80    | 80       | Hospital           | Any smoking status | Gutkha                  |
| Agashe      | 2013 | Stroke (unspecified) | Maharashtra        | Case-control | Males | 15-99     | Self-report         | Physician diagnosis                                  | Morbidity | NA          | NA      | N/A               | 80    | 80       | Hospital           | Any smoking status | Pan with Tobacco        |
| Gajalakshmi | 2015 | Stroke (unspecified) | Tamil Nadu         | Case-control | Both  | 35-69     | Self-report         | Death certificates                                   | Mortality | NA          | NA      | N/A               | NA    | 429,306  | Community          | Never smokers      | Exact                   |
| Mateen      | 2012 | Stroke (unspecified) | Bangladesh         | Case-control | Both  | 20-101    | Self-report         | Administrative medical records or disease registries | Mortality | NA          | NA      | N/A               | 1,250 | 133      | Community          | Any smoking status | Betel Quid with Tobacco |

## Section 2.2: Effect Size Data Details

In the cases of head and neck cancer studies where effect sizes were reported and extracted for aggregate outcomes, we matched those effect sizes to the corresponding component outcomes that align with GBD outcome definitions. As an example, an effect size estimated for lip and oral cancer *and* esophageal cancer combined would be associated both with lip and oral cavity cancer and with esophageal cancer in our datasets for each outcome.

From the extracted and cleaned data points, we identified data points that were eligible for inclusion in our models in order to capture the observation(s) from each included study that would best inform our estimates. This process was undertaken because studies often reported several effect sizes estimated from the same populations for the same health outcome but with slightly different parameters. As an example, a study might report on both head and neck cancers broadly and each sub-outcome specifically; several models with different degrees of adjustment for potential confounders; the risk associated with current chewing and with ever chewing; etc... Including all extracted data points in the models would introduce unnecessary noise and over-represent studies that happened to report more observations. In order to address this challenge, we applied a data point selection process in which each study's extracted data points were evaluated using the following stepwise criteria to identify the most adjusted effect sizes with the closest match to our outcome case definition, our exposure definition, and largest sample size for each analytic sample:

### Best match outcome definition:

We selected the observations from each study that best matched the GBD outcome definitions. For studies that reported effect sizes for both aggregate outcome definitions and specific outcome definitions, we selected the specific outcome definitions since these are the ones used in the GBD. For studies that reported effect sizes for several distinct cancer sub-types that mapped to the same GBD outcome, both effect sizes were included with no adjustment since one sub-type is not necessarily a better match for the mapped outcome.

### Best match exposure definition:

From the observations with the closest outcome definition, we selected the observations from each study that best matched the chewing tobacco exposure definition used in the GBD. For example, if a study reported on several sub-types of chewing tobacco and on chewing tobacco broadly, we would select the observation that corresponded with the broadest chewing tobacco definition, since our exposure definition is not limited to a specific chewing tobacco product. If a study reported an effect size for ever tobacco chewing and for current tobacco chewing, we preferred the observation of the risk associated with current tobacco chewing.

### Most adjusted effect size reported:

If multiple observations from the same study met the above criteria, we selected the most adjusted effect size reported. If there were multiple models that adjusted for the same number of potential confounding variables, we prioritized the models that adjusted for smoking.

### Combined sub-groups:

Lastly, if multiple observations still met all of the above criteria, these observations were frequently from studies that reported effect sizes for aggregated and disaggregated sub-groups. Examples of these include observations for males and females combined and separate and multiple study sites being reported as distinct effect sizes and a combined effect size. Since our models are not sex-specific or location-specific, we preferred the effect sizes reported for combined sub-groups over those that were disaggregated. These observations were also informed by large sample sizes.

In the cases where a study still had multiple eligible observations selected after this stepwise process, we examined the differences in the observations to determine whether or not the analytic sample from which they were derived overlapped. Most were studies that only reported the best match and most adjusted effect sizes for disaggregated and mutually exclusive sub-groups, which were all included with no further adjustments. For 13 study-outcome combinations, however, we identified the best match and most adjusted effect sizes for different types of chewing tobacco products without a reported broad chewing tobacco effect size. These groups of users are not mutually exclusive (someone using one form of chewing tobacco is not precluded from using another), but no further information was provided at the study-level regarding the degree of potential overlap between groups. As a result, to avoid the overrepresentation of the individuals in these analytic samples, we down-weighted the data points with overlapping exposure groups based on the number of overlapping observations from that study using the following equation:

$$\text{standard error used for modeling} = \sqrt{\text{number of overlapping observations}} \times \text{observed standard error}$$

**Table S5: Summary of Data Inputs**

| Author      | Health outcome             | Sample sex | Log(effect size) | Standard error of log(effect size) | Flagged bias covariates                                                                                                                                               | Rational for multiple observations                                                  |
|-------------|----------------------------|------------|------------------|------------------------------------|-----------------------------------------------------------------------------------------------------------------------------------------------------------------------|-------------------------------------------------------------------------------------|
| Agashe 2013 | Stroke                     | Male       | 0.46             | 0.45                               | Geographically representative; Representative; Maximally adjusted; Adjusted for smoking, age, and sex; Chewing tobacco product                                        | Different exposure definitions; Adjusted for non-exclusive samples by a factor of 2 |
| Agashe 2013 | Stroke                     | Male       | 0.54             | 1.06                               | Geographically representative; Representative; Maximally adjusted; Adjusted for smoking, age, and sex; Chewing tobacco product                                        |                                                                                     |
| Akhtar 2012 | Esophageal cancer          | Both       | 2.65             | 0.41                               | Geographically representative; Representative; Chewing tobacco temporality; Chewing tobacco product                                                                   |                                                                                     |
| Akhtar 2016 | Larynx cancer              | Both       | 0.58             | 0.61                               | Geographically representative; Representative; Chewing tobacco temporality; Aggregate outcome definition                                                              |                                                                                     |
| Akhtar 2016 | Lip and oral cavity cancer | Both       | 0.58             | 0.61                               | Geographically representative; Representative; Chewing tobacco temporality; Aggregate outcome definition                                                              |                                                                                     |
| Akhtar 2016 | Nasopharynx cancer         | Both       | 0.58             | 0.61                               | Geographically representative; Representative; Chewing tobacco temporality; Aggregate outcome definition                                                              |                                                                                     |
| Akhtar 2016 | Other pharynx cancer       | Both       | 0.58             | 0.61                               | Geographically representative; Representative; Chewing tobacco temporality; Aggregate outcome definition                                                              |                                                                                     |
| Akram 2013  | Lip and oral cavity cancer | Both       | 4.03             | 0.65                               | Geographically representative; Representative; Maximally adjusted; Adjusted for smoking, age, and sex                                                                 |                                                                                     |
| Amtha 2014  | Lip and oral cavity cancer | Both       | 1.52             | 0.72                               | Geographically representative; Maximally adjusted; Adjusted for smoking, age, and sex; Adjusted for age and sex; Chewing tobacco temporality; Chewing tobacco product |                                                                                     |

|                   |                            |        |       |      |                                                                                                                                                                                                        |                                                                                                                                                    |
|-------------------|----------------------------|--------|-------|------|--------------------------------------------------------------------------------------------------------------------------------------------------------------------------------------------------------|----------------------------------------------------------------------------------------------------------------------------------------------------|
| Anantharaman 2007 | Lip and oral cavity cancer | Both   | -0.72 | 0.21 | Geographically representative; Representative; Maximally adjusted; Chewing tobacco temporality; Sub-population                                                                                         | Mutually exclusive smoking groups used to stratify analytical samples                                                                              |
| Anantharaman 2007 | Lip and oral cavity cancer | Both   | 0.56  | 0.29 | Geographically representative; Representative; Maximally adjusted; Chewing tobacco temporality; Sub-population                                                                                         |                                                                                                                                                    |
| Anantharaman 2014 | Lip and oral cavity cancer | Both   | 2.12  | 0.18 | Geographically representative; Representative; Chewing tobacco temporality; Aggregate outcome definition                                                                                               |                                                                                                                                                    |
| Anantharaman 2014 | Other pharynx cancer       | Both   | 2.12  | 0.18 | Geographically representative; Representative; Chewing tobacco temporality; Aggregate outcome definition                                                                                               |                                                                                                                                                    |
| Anuradha 2019     | Larynx cancer              | Both   | 0.72  | 0.35 | Geographically representative; Representative; Maximally adjusted; Adjusted for smoking, age, and sex; Chewing tobacco temporality; Aggregate outcome definition                                       |                                                                                                                                                    |
| Anuradha 2019     | Lip and oral cavity cancer | Both   | 0.72  | 0.35 | Geographically representative; Representative; Maximally adjusted; Adjusted for smoking, age, and sex; Chewing tobacco temporality; Aggregate outcome definition                                       |                                                                                                                                                    |
| Anuradha 2019     | Nasopharynx cancer         | Both   | 0.72  | 0.35 | Geographically representative; Representative; Maximally adjusted; Adjusted for smoking, age, and sex; Chewing tobacco temporality; Aggregate outcome definition                                       |                                                                                                                                                    |
| Anuradha 2019     | Other pharynx cancer       | Both   | 0.72  | 0.35 | Geographically representative; Representative; Maximally adjusted; Adjusted for smoking, age, and sex; Chewing tobacco temporality; Aggregate outcome definition                                       |                                                                                                                                                    |
| Arain 2015        | Lip and oral cavity cancer | Female | -0.08 | 0.25 | Geographically representative; Representative; Maximally adjusted; Adjusted for smoking, age, and sex; Adjusted for age and sex; Chewing tobacco product; Sub-population                               | Separate effect sizes reported for each sex and different types of chewing tobacco products; Adjusted for non-exclusive exposures by a factor of 2 |
| Arain 2015        | Lip and oral cavity cancer | Female | 0.16  | 0.26 | Geographically representative; Representative; Maximally adjusted; Adjusted for smoking, age, and sex; Adjusted for age and sex; Chewing tobacco product; Sub-population                               |                                                                                                                                                    |
| Arain 2015        | Lip and oral cavity cancer | Male   | 0.29  | 0.21 | Geographically representative; Representative; Maximally adjusted; Adjusted for smoking, age, and sex; Adjusted for age and sex; Chewing tobacco product; Sub-population                               |                                                                                                                                                    |
| Arain 2015        | Lip and oral cavity cancer | Male   | -0.13 | 0.21 | Geographically representative; Representative; Maximally adjusted; Adjusted for smoking, age, and sex; Adjusted for age and sex; Chewing tobacco product; Sub-population                               |                                                                                                                                                    |
| Arain 2015        | Nasopharynx cancer         | Female | -0.34 | 0.50 | Geographically representative; Representative; Maximally adjusted; Adjusted for smoking, age, and sex; Adjusted for age and sex; Chewing tobacco product; Sub-population; Aggregate outcome definition | Separate effect sizes reported for each sex and different types of chewing tobacco products; Adjusted for non-exclusive exposures by a factor of 2 |
| Arain 2015        | Nasopharynx cancer         | Female | 0.41  | 0.44 | Geographically representative; Representative; Maximally adjusted; Adjusted for smoking, age, and sex; Adjusted for age and sex; Chewing tobacco product; Sub-population; Aggregate outcome definition |                                                                                                                                                    |
| Arain 2015        | Nasopharynx cancer         | Male   | -0.10 | 0.42 | Geographically representative; Representative; Maximally adjusted; Adjusted for smoking, age, and sex; Adjusted for age and sex; Chewing tobacco product; Sub-population; Aggregate outcome definition |                                                                                                                                                    |
| Arain 2015        | Nasopharynx cancer         | Male   | -0.26 | 0.40 | Geographically representative; Representative; Maximally adjusted; Adjusted for smoking, age, and sex; Adjusted for age and sex; Chewing tobacco product; Sub-population; Aggregate outcome definition |                                                                                                                                                    |

|                |                            |        |       |      |                                                                                                                                                                                                        |                                                                                                                                                             |
|----------------|----------------------------|--------|-------|------|--------------------------------------------------------------------------------------------------------------------------------------------------------------------------------------------------------|-------------------------------------------------------------------------------------------------------------------------------------------------------------|
| Arain 2015     | Other pharynx cancer       | Female | -0.34 | 0.50 | Geographically representative; Representative; Maximally adjusted; Adjusted for smoking, age, and sex; Adjusted for age and sex; Chewing tobacco product; Sub-population; Aggregate outcome definition | Separate effect sizes reported for each sex and different types of chewing tobacco products; Adjusted for non-exclusive exposure groupings by a factor of 2 |
| Arain 2015     | Other pharynx cancer       | Female | 0.41  | 0.44 | Geographically representative; Representative; Maximally adjusted; Adjusted for smoking, age, and sex; Adjusted for age and sex; Chewing tobacco product; Sub-population; Aggregate outcome definition |                                                                                                                                                             |
| Arain 2015     | Other pharynx cancer       | Male   | -0.10 | 0.42 | Geographically representative; Representative; Maximally adjusted; Adjusted for smoking, age, and sex; Adjusted for age and sex; Chewing tobacco product; Sub-population; Aggregate outcome definition |                                                                                                                                                             |
| Arain 2015     | Other pharynx cancer       | Male   | -0.26 | 0.40 | Geographically representative; Representative; Maximally adjusted; Adjusted for smoking, age, and sex; Adjusted for age and sex; Chewing tobacco product; Sub-population; Aggregate outcome definition |                                                                                                                                                             |
| Awan 2016      | Lip and oral cavity cancer | Both   | 0.45  | 0.77 | Geographically representative; Representative; Maximally adjusted; Adjusted for smoking, age, and sex; Adjusted for age and sex; Chewing tobacco temporality; Chewing tobacco product                  | Effect sizes reported for different chewing tobacco sub-types; Adjusted for non-exclusive samples by a factor of 5                                          |
| Awan 2016      | Lip and oral cavity cancer | Both   | 0.13  | 1.76 | Geographically representative; Representative; Maximally adjusted; Adjusted for smoking, age, and sex; Adjusted for age and sex; Chewing tobacco temporality                                           |                                                                                                                                                             |
| Awan 2016      | Lip and oral cavity cancer | Both   | 1.71  | 0.77 | Geographically representative; Representative; Maximally adjusted; Adjusted for smoking, age, and sex; Adjusted for age and sex; Chewing tobacco temporality; Chewing tobacco product                  |                                                                                                                                                             |
| Awan 2016      | Lip and oral cavity cancer | Both   | 0.26  | 1.46 | Geographically representative; Representative; Maximally adjusted; Adjusted for smoking, age, and sex; Adjusted for age and sex; Chewing tobacco temporality; Chewing tobacco product                  |                                                                                                                                                             |
| Awan 2016      | Lip and oral cavity cancer | Both   | 1.32  | 1.08 | Geographically representative; Representative; Maximally adjusted; Adjusted for smoking, age, and sex; Adjusted for age and sex; Chewing tobacco temporality; Chewing tobacco product                  |                                                                                                                                                             |
| Balaram 2002   | Lip and oral cavity cancer | Male   | 1.81  | 0.24 | Geographically representative; Representative; Chewing tobacco temporality; Chewing tobacco product; Sub-population                                                                                    | Sex-specific effect sizes were reported with no effect size reported for the aggregate "both" sexes                                                         |
| Balaram 2002   | Lip and oral cavity cancer | Female | 3.83  | 0.31 | Geographically representative; Representative; Maximally adjusted; Adjusted for smoking, age, and sex; Chewing tobacco temporality; Chewing tobacco product; Sub-population                            |                                                                                                                                                             |
| Basu 2008      | Larynx cancer              | Both   | 0.41  | 0.92 | Geographically representative; Representative; Maximally adjusted; Adjusted for smoking, age, and sex; Chewing tobacco product; Aggregate outcome definition                                           |                                                                                                                                                             |
| Basu 2008      | Lip and oral cavity cancer | Both   | 0.41  | 0.92 | Geographically representative; Representative; Maximally adjusted; Adjusted for smoking, age, and sex; Chewing tobacco product; Aggregate outcome definition                                           |                                                                                                                                                             |
| Buch 2002      | Lip and oral cavity cancer | Both   | 0.49  | 0.15 | Geographically representative; Representative; Maximally adjusted; Adjusted for smoking, age, and sex; Adjusted for age and sex; Chewing tobacco product                                               |                                                                                                                                                             |
| Bundgaard 1995 | Lip and oral cavity cancer | Both   | 0.36  | 0.45 | Geographically representative; Maximally adjusted; Adjusted for smoking, age, and sex; Chewing tobacco temporality                                                                                     |                                                                                                                                                             |

|                  |                            |        |      |      |                                                                                                                                                                                                                     |                                                                                                                    |
|------------------|----------------------------|--------|------|------|---------------------------------------------------------------------------------------------------------------------------------------------------------------------------------------------------------------------|--------------------------------------------------------------------------------------------------------------------|
| Chang 2020       | Larynx cancer              | Both   | 1.11 | 0.24 | Geographically representative; Representative; Chewing tobacco temporality; Chewing tobacco product; Aggregate outcome definition                                                                                   |                                                                                                                    |
| Chang 2020       | Lip and oral cavity cancer | Both   | 1.11 | 0.24 | Geographically representative; Representative; Chewing tobacco temporality; Chewing tobacco product; Aggregate outcome definition                                                                                   |                                                                                                                    |
| Chang 2020       | Other pharynx cancer       | Both   | 1.11 | 0.24 | Geographically representative; Representative; Chewing tobacco temporality; Chewing tobacco product; Aggregate outcome definition                                                                                   |                                                                                                                    |
| Challeng 2000    | Nasopharynx cancer         | Both   | 0.34 | 0.40 | Geographically representative; Representative; Maximally adjusted; Adjusted for smoking, age, and sex                                                                                                               |                                                                                                                    |
| Chitra 2004      | Esophageal cancer          | Both   | 0.92 | 0.38 | Geographically representative; Representative; Maximally adjusted; Adjusted for smoking, age, and sex; Chewing tobacco temporality                                                                                  |                                                                                                                    |
| Choudhury 2015   | Larynx cancer              | Both   | 0.77 | 0.21 | Geographically representative; Representative; Maximally adjusted; Adjusted for smoking, age, and sex; Adjusted for age and sex; Chewing tobacco temporality; Chewing tobacco product; Aggregate outcome definition |                                                                                                                    |
| Choudhury 2015   | Lip and oral cavity cancer | Both   | 0.77 | 0.21 | Geographically representative; Representative; Maximally adjusted; Adjusted for smoking, age, and sex; Adjusted for age and sex; Chewing tobacco temporality; Chewing tobacco product; Aggregate outcome definition |                                                                                                                    |
| Choudhury 2015   | Nasopharynx cancer         | Both   | 0.77 | 0.21 | Geographically representative; Representative; Maximally adjusted; Adjusted for smoking, age, and sex; Adjusted for age and sex; Chewing tobacco temporality; Chewing tobacco product; Aggregate outcome definition |                                                                                                                    |
| Choudhury 2015   | Other pharynx cancer       | Both   | 0.77 | 0.21 | Geographically representative; Representative; Maximally adjusted; Adjusted for smoking, age, and sex; Adjusted for age and sex; Chewing tobacco temporality; Chewing tobacco product; Aggregate outcome definition |                                                                                                                    |
| Dar 2012         | Esophageal cancer          | Both   | 1.05 | 0.61 | Geographically representative; Representative; Chewing tobacco temporality; Chewing tobacco product                                                                                                                 |                                                                                                                    |
| Das 2017         | Esophageal cancer          | Both   | 1.91 | 0.70 | Geographically representative; Representative; Maximally adjusted; Adjusted for smoking, age, and sex; Chewing tobacco product                                                                                      | Effect sizes reported for different chewing tobacco sub-types; Adjusted for non-exclusive samples by a factor of 3 |
| Das 2017         | Esophageal cancer          | Both   | 1.95 | 0.83 | Geographically representative; Representative; Chewing tobacco product                                                                                                                                              |                                                                                                                    |
| Das 2017         | Esophageal cancer          | Both   | 1.61 | 0.77 | Geographically representative; Representative; Chewing tobacco product                                                                                                                                              |                                                                                                                    |
| Dholam 2016      | Lip and oral cavity cancer | Both   | 2.14 | 0.42 | Geographically representative; Representative; Chewing tobacco temporality; Sub-population; Aggregate outcome definition                                                                                            |                                                                                                                    |
| Dholam 2016      | Other pharynx cancer       | Both   | 2.14 | 0.42 | Geographically representative; Representative; Chewing tobacco temporality; Sub-population; Aggregate outcome definition                                                                                            |                                                                                                                    |
| Dikshit 2000     | Lip and oral cavity cancer | Male   | 1.76 | 0.25 | Geographically representative; Maximally adjusted; Chewing tobacco temporality                                                                                                                                      |                                                                                                                    |
| Dikshit 2000     | Other pharynx cancer       | Male   | 0.18 | 0.21 | Geographically representative; Maximally adjusted; Chewing tobacco temporality                                                                                                                                      |                                                                                                                    |
| Edirisinghe 2022 | Lip and oral cavity cancer | Both   | 1.22 | 0.55 | Representative; Maximally adjusted; Adjusted for smoking, age, and sex; Chewing tobacco product                                                                                                                     | Effect sizes reported for different chewing tobacco sub-types; Adjusted for non-exclusive samples by a factor of 2 |
| Edirisinghe 2022 | Lip and oral cavity cancer | Both   | 1.45 | 0.47 | Representative; Maximally adjusted; Adjusted for smoking, age, and sex; Chewing tobacco product                                                                                                                     |                                                                                                                    |
| Gajalakshmi 2012 | Esophageal cancer          | Female | 1.34 | 0.26 | Geographically representative; Representative; Chewing tobacco temporality; Outcome assessment; Sub-population; Aggregate outcome definition                                                                        | Sex-specific effect sizes were reported for mutually exclusive populations (eg. urban and rural) with no           |



|                  |                            |        |      |      |                                                                                                                                              |                                                                                                                                           |
|------------------|----------------------------|--------|------|------|----------------------------------------------------------------------------------------------------------------------------------------------|-------------------------------------------------------------------------------------------------------------------------------------------|
| Gajalakshmi 2012 | Esophageal cancer          | Female | 0.99 | 0.16 | Geographically representative; Representative; Chewing tobacco temporality; Outcome assessment; Sub-population; Aggregate outcome definition | aggregate effect sizes reported.                                                                                                          |
| Gajalakshmi 2012 | Esophageal cancer          | Male   | 0.64 | 0.40 | Geographically representative; Representative; Chewing tobacco temporality; Outcome assessment; Sub-population; Aggregate outcome definition |                                                                                                                                           |
| Gajalakshmi 2012 | Esophageal cancer          | Male   | 0.79 | 0.24 | Geographically representative; Representative; Chewing tobacco temporality; Outcome assessment; Sub-population; Aggregate outcome definition |                                                                                                                                           |
| Gajalakshmi 2012 | Larynx cancer              | Female | 1.34 | 0.26 | Geographically representative; Representative; Chewing tobacco temporality; Outcome assessment; Sub-population; Aggregate outcome definition | Sex-specific effect sizes were reported for mutually exclusive populations (eg. urban and rural) with no aggregate effect sizes reported. |
| Gajalakshmi 2012 | Larynx cancer              | Female | 0.99 | 0.16 | Geographically representative; Representative; Chewing tobacco temporality; Outcome assessment; Sub-population; Aggregate outcome definition |                                                                                                                                           |
| Gajalakshmi 2012 | Larynx cancer              | Male   | 0.64 | 0.40 | Geographically representative; Representative; Chewing tobacco temporality; Outcome assessment; Sub-population; Aggregate outcome definition |                                                                                                                                           |
| Gajalakshmi 2012 | Larynx cancer              | Male   | 0.79 | 0.24 | Geographically representative; Representative; Chewing tobacco temporality; Outcome assessment; Sub-population; Aggregate outcome definition |                                                                                                                                           |
| Gajalakshmi 2012 | Lip and oral cavity cancer | Female | 1.34 | 0.26 | Geographically representative; Representative; Chewing tobacco temporality; Outcome assessment; Sub-population; Aggregate outcome definition | Sex-specific effect sizes were reported for mutually exclusive populations (eg. urban and rural) with no aggregate effect sizes reported. |
| Gajalakshmi 2012 | Lip and oral cavity cancer | Female | 0.99 | 0.16 | Geographically representative; Representative; Chewing tobacco temporality; Outcome assessment; Sub-population; Aggregate outcome definition |                                                                                                                                           |
| Gajalakshmi 2012 | Lip and oral cavity cancer | Male   | 0.64 | 0.40 | Geographically representative; Representative; Chewing tobacco temporality; Outcome assessment; Sub-population; Aggregate outcome definition |                                                                                                                                           |
| Gajalakshmi 2012 | Lip and oral cavity cancer | Male   | 0.79 | 0.24 | Geographically representative; Representative; Chewing tobacco temporality; Outcome assessment; Sub-population; Aggregate outcome definition |                                                                                                                                           |
| Gajalakshmi 2012 | Nasopharynx cancer         | Female | 1.34 | 0.26 | Geographically representative; Representative; Chewing tobacco temporality; Outcome assessment; Sub-population; Aggregate outcome definition | Sex-specific effect sizes were reported for mutually exclusive populations (eg. urban and rural) with no aggregate effect sizes reported. |
| Gajalakshmi 2012 | Nasopharynx cancer         | Female | 0.99 | 0.16 | Geographically representative; Representative; Chewing tobacco temporality; Outcome assessment; Sub-population; Aggregate outcome definition |                                                                                                                                           |
| Gajalakshmi 2012 | Nasopharynx cancer         | Male   | 0.64 | 0.40 | Geographically representative; Representative; Chewing tobacco temporality; Outcome assessment; Sub-population; Aggregate outcome definition |                                                                                                                                           |
| Gajalakshmi 2012 | Nasopharynx cancer         | Male   | 0.79 | 0.24 | Geographically representative; Representative; Chewing tobacco temporality; Outcome assessment; Sub-population; Aggregate outcome definition |                                                                                                                                           |
| Gajalakshmi 2012 | Other pharynx cancer       | Female | 1.34 | 0.26 | Geographically representative; Representative; Chewing tobacco temporality; Outcome assessment; Sub-population; Aggregate outcome definition | Sex-specific effect sizes were reported for mutually exclusive populations (eg. urban and rural) with no                                  |

|                  |                            |        |       |      |                                                                                                                                                                  |                                                                                                                      |
|------------------|----------------------------|--------|-------|------|------------------------------------------------------------------------------------------------------------------------------------------------------------------|----------------------------------------------------------------------------------------------------------------------|
| Gajalakshmi 2012 | Other pharynx cancer       | Female | 0.99  | 0.16 | Geographically representative; Representative; Chewing tobacco temporality; Outcome assessment; Sub-population; Aggregate outcome definition                     | aggregate effect sizes reported.                                                                                     |
| Gajalakshmi 2012 | Other pharynx cancer       | Male   | 0.64  | 0.40 | Geographically representative; Representative; Chewing tobacco temporality; Outcome assessment; Sub-population; Aggregate outcome definition                     |                                                                                                                      |
| Gajalakshmi 2012 | Other pharynx cancer       | Male   | 0.79  | 0.24 | Geographically representative; Representative; Chewing tobacco temporality; Outcome assessment; Sub-population; Aggregate outcome definition                     |                                                                                                                      |
| Gajalakshmi 2015 | Stroke                     | Both   | 0.34  | 0.07 | Geographically representative; Representative; Chewing tobacco temporality                                                                                       |                                                                                                                      |
| Ganesh 2009      | Esophageal cancer          | Both   | 0.26  | 0.19 | Geographically representative; Representative; Maximally adjusted; Adjusted for smoking, age, and sex; Chewing tobacco temporality; Chewing tobacco product      | Effect sizes reported for different chewing tobacco definitions; Adjusted for non-exclusive samples by a factor of 2 |
| Ganesh 2009      | Esophageal cancer          | Both   | 0.10  | 0.38 | Geographically representative; Representative; Maximally adjusted; Adjusted for smoking, age, and sex; Chewing tobacco temporality                               |                                                                                                                      |
| Gholap 2023      | Larynx cancer              | Male   | 1.74  | 0.64 | Representative; Maximally adjusted; Adjusted for smoking, age, and sex; Chewing tobacco temporality; Chewing tobacco product                                     | Effect sizes reported for different, mutually exclusive chewing tobacco definitions.                                 |
| Gholap 2023      | Larynx cancer              | Male   | 0.92  | 1.06 | Representative; Maximally adjusted; Adjusted for smoking, age, and sex; Chewing tobacco temporality; Chewing tobacco product                                     |                                                                                                                      |
| Gholap 2023      | Larynx cancer              | Male   | 2.45  | 0.58 | Representative; Maximally adjusted; Adjusted for smoking, age, and sex; Chewing tobacco temporality; Chewing tobacco product                                     |                                                                                                                      |
| Gholap 2023      | Lip and oral cavity cancer | Male   | 2.69  | 0.27 | Representative; Maximally adjusted; Adjusted for smoking, age, and sex; Chewing tobacco temporality; Chewing tobacco product                                     | Effect sizes reported for different, mutually exclusive chewing tobacco definitions.                                 |
| Gholap 2023      | Lip and oral cavity cancer | Male   | 3.52  | 0.27 | Representative; Maximally adjusted; Adjusted for smoking, age, and sex; Chewing tobacco temporality; Chewing tobacco product                                     |                                                                                                                      |
| Gholap 2023      | Lip and oral cavity cancer | Male   | 3.19  | 0.25 | Representative; Maximally adjusted; Adjusted for smoking, age, and sex; Chewing tobacco temporality; Chewing tobacco product                                     |                                                                                                                      |
| Goud 1990        | Lip and oral cavity cancer | Both   | 2.22  | 0.32 | Geographically representative; Representative; Maximally adjusted; Adjusted for smoking, age, and sex                                                            |                                                                                                                      |
| Gupta 2007       | Ischemic heart disease     | Both   | -0.49 | 0.58 | Geographically representative; Representative; Maximally adjusted; Adjusted for smoking, age, and sex; Adjusted for age and sex; Chewing tobacco temporality     |                                                                                                                      |
| Gupta 2014       | Lip and oral cavity cancer | Both   | -1.21 | 0.42 | Geographically representative; Representative; Maximally adjusted; Adjusted for smoking, age, and sex; Adjusted for age and sex; Chewing tobacco temporality     |                                                                                                                      |
| Gupta 2017       | Lip and oral cavity cancer | Both   | 2.14  | 0.28 | Geographically representative; Chewing tobacco temporality                                                                                                       |                                                                                                                      |
| Gupta 2020       | Esophageal cancer          | Both   | 4.27  | 0.37 | Geographically representative; Representative; Maximally adjusted; Adjusted for smoking, age, and sex; Chewing tobacco temporality; Aggregate outcome definition |                                                                                                                      |
| Gupta 2020       | Larynx cancer              | Both   | 4.27  | 0.37 | Geographically representative; Representative; Maximally adjusted; Adjusted for smoking, age, and sex; Chewing tobacco temporality; Aggregate outcome definition |                                                                                                                      |
| Gupta 2020       | Lip and oral cavity cancer | Both   | 4.27  | 0.37 | Geographically representative; Representative; Maximally adjusted; Adjusted for smoking, age, and sex; Chewing tobacco temporality; Aggregate outcome definition |                                                                                                                      |

|                  |                            |        |       |      |                                                                                                                                                                                       |                                                                                                              |
|------------------|----------------------------|--------|-------|------|---------------------------------------------------------------------------------------------------------------------------------------------------------------------------------------|--------------------------------------------------------------------------------------------------------------|
| Gupta 2020       | Nasopharynx cancer         | Both   | 4.27  | 0.37 | Geographically representative; Representative; Maximally adjusted; Adjusted for smoking, age, and sex; Chewing tobacco temporality; Aggregate outcome definition                      |                                                                                                              |
| Gupta 2020       | Other pharynx cancer       | Both   | 4.27  | 0.37 | Geographically representative; Representative; Maximally adjusted; Adjusted for smoking, age, and sex; Chewing tobacco temporality; Aggregate outcome definition                      |                                                                                                              |
| Henley 2005      | Ischemic heart disease     | Male   | 0.22  | 0.10 | Representative                                                                                                                                                                        |                                                                                                              |
| Herrero 2003     | Lip and oral cavity cancer | Both   | 2.72  | 0.15 | Geographically representative; Representative; Maximally adjusted; Adjusted for smoking, age, and sex; Chewing tobacco temporality; Chewing tobacco product                           |                                                                                                              |
| Herrero 2003     | Other pharynx cancer       | Both   | 0.15  | 0.47 | Geographically representative; Representative; Maximally adjusted; Adjusted for smoking, age, and sex; Chewing tobacco temporality; Chewing tobacco product                           |                                                                                                              |
| Ihsan 2010       | Esophageal cancer          | Both   | 0.62  | 0.23 | Geographically representative; Representative; Maximally adjusted; Adjusted for smoking, age, and sex; Chewing tobacco temporality                                                    |                                                                                                              |
| Ihsan 2011       | Lip and oral cavity cancer | Both   | 1.12  | 0.27 | Geographically representative; Representative; Chewing tobacco temporality                                                                                                            |                                                                                                              |
| Imam 2021        | Lip and oral cavity cancer | Both   | 3.08  | 1.04 | Geographically representative; Representative; Maximally adjusted; Adjusted for smoking, age, and sex; Adjusted for age and sex; Chewing tobacco temporality; Chewing tobacco product |                                                                                                              |
| Jafarey 1977     | Lip and oral cavity cancer | Both   | 2.46  | 0.19 | Geographically representative; Sub-population; Aggregate outcome definition                                                                                                           | Mutually exclusive samples stratified by smoking status                                                      |
| Jafarey 1977     | Lip and oral cavity cancer | Both   | -0.04 | 0.14 | Geographically representative; Sub-population; Aggregate outcome definition                                                                                                           |                                                                                                              |
| Jafarey 1977     | Other pharynx cancer       | Both   | 2.46  | 0.19 | Geographically representative; Sub-population; Aggregate outcome definition                                                                                                           | Mutually exclusive samples stratified by smoking status                                                      |
| Jafarey 1977     | Other pharynx cancer       | Both   | -0.04 | 0.14 | Geographically representative; Sub-population; Aggregate outcome definition                                                                                                           |                                                                                                              |
| Jayalekshmi 2009 | Lip and oral cavity cancer | Female | 1.70  | 0.26 | Maximally adjusted; Adjusted for smoking, age, and sex                                                                                                                                |                                                                                                              |
| Jayalekshmi 2011 | Lip and oral cavity cancer | Male   | 0.88  | 0.17 |                                                                                                                                                                                       |                                                                                                              |
| Jayalekshmi 2013 | Larynx cancer              | Male   | -0.11 | 0.23 | Geographically representative                                                                                                                                                         |                                                                                                              |
| Jayalekshmi 2013 | Other pharynx cancer       | Male   | -0.11 | 0.31 | Geographically representative                                                                                                                                                         |                                                                                                              |
| Jayalekshmi 2021 | Esophageal cancer          | Male   | -0.22 | 0.18 | Maximally adjusted; Adjusted for smoking, age, and sex                                                                                                                                |                                                                                                              |
| Joshi 2009       | Esophageal cancer          | Both   | 0.51  | 0.29 | Geographically representative; Representative; Maximally adjusted; Adjusted for smoking, age, and sex                                                                                 |                                                                                                              |
| Jussawalla 1971  | Esophageal cancer          | Both   | 0.93  | 0.17 | Geographically representative; Chewing tobacco product                                                                                                                                |                                                                                                              |
| Jussawalla 1971  | Larynx cancer              | Both   | 1.52  | 0.17 | Geographically representative; Chewing tobacco product                                                                                                                                |                                                                                                              |
| Jussawalla 1971  | Lip and oral cavity cancer | Both   | 1.79  | 0.16 | Geographically representative; Chewing tobacco product                                                                                                                                |                                                                                                              |
| Jussawalla 1971  | Nasopharynx cancer         | Both   | 0.57  | 0.71 | Geographically representative; Chewing tobacco product                                                                                                                                |                                                                                                              |
| Jussawalla 1971  | Other pharynx cancer       | Both   | 1.83  | 0.40 | Geographically representative; Chewing tobacco product                                                                                                                                | Effect sizes reported for each component of other pharynx cancer (oropharynx cancer and hypopharynx cancer). |
| Jussawalla 1971  | Other pharynx cancer       | Both   | 1.19  | 0.19 | Geographically representative; Chewing tobacco product                                                                                                                                |                                                                                                              |
| Kabat 1994       | Lip and oral cavity cancer | Male   | 0.81  | 0.60 | Geographically representative; Representative; Aggregate outcome definition                                                                                                           |                                                                                                              |
| Kabat 1994       | Other pharynx cancer       | Male   | 0.81  | 0.60 | Geographically representative; Representative; Aggregate outcome definition                                                                                                           |                                                                                                              |

|                   |                            |        |      |      |                                                                                                                                                                                                                     |                                                                                                                                                                                                                                                                                                 |
|-------------------|----------------------------|--------|------|------|---------------------------------------------------------------------------------------------------------------------------------------------------------------------------------------------------------------------|-------------------------------------------------------------------------------------------------------------------------------------------------------------------------------------------------------------------------------------------------------------------------------------------------|
| Kapil 2005        | Larynx cancer              | Both   | 0.09 | 0.36 | Geographically representative; Representative; Maximally adjusted; Adjusted for smoking, age, and sex                                                                                                               | Effect sizes reported for different chewing tobacco definitions; Adjusted for non-exclusive samples by a factor of 2                                                                                                                                                                            |
| Kapil 2005        | Larynx cancer              | Both   | 0.86 | 0.54 | Geographically representative; Representative; Maximally adjusted; Adjusted for smoking, age, and sex; Chewing tobacco product                                                                                      |                                                                                                                                                                                                                                                                                                 |
| Kazi 2010         | Lip and oral cavity cancer | Female | 0.61 | 0.23 | Geographically representative; Representative; Maximally adjusted; Adjusted for smoking, age, and sex; Adjusted for age and sex; Chewing tobacco temporality                                                        |                                                                                                                                                                                                                                                                                                 |
| Kietthubthwe 2001 | Lip and oral cavity cancer | Both   | 0.13 | 0.49 | Geographically representative; Representative; Chewing tobacco product                                                                                                                                              |                                                                                                                                                                                                                                                                                                 |
| Krishna 2014      | Lip and oral cavity cancer | Both   | 1.47 | 0.36 | Geographically representative; Representative; Chewing tobacco temporality                                                                                                                                          |                                                                                                                                                                                                                                                                                                 |
| Krishnarao 2015   | Lip and oral cavity cancer | Both   | 1.10 | 0.12 | Geographically representative; Representative; Maximally adjusted; Adjusted for smoking, age, and sex; Adjusted for age and sex; Chewing tobacco temporality; Chewing tobacco product; Aggregate outcome definition |                                                                                                                                                                                                                                                                                                 |
| Krishnarao 2015   | Other pharynx cancer       | Both   | 1.10 | 0.12 | Geographically representative; Representative; Maximally adjusted; Adjusted for smoking, age, and sex; Adjusted for age and sex; Chewing tobacco temporality; Chewing tobacco product; Aggregate outcome definition |                                                                                                                                                                                                                                                                                                 |
| Lakhanpal 2014    | Lip and oral cavity cancer | Both   | 0.11 | 0.31 | Geographically representative; Representative; Maximally adjusted; Adjusted for smoking, age, and sex; Adjusted for age and sex; Chewing tobacco temporality                                                        |                                                                                                                                                                                                                                                                                                 |
| Lohe 2010         | Lip and oral cavity cancer | Both   | 3.20 | 2.53 | Geographically representative; Representative; Maximally adjusted; Adjusted for smoking, age, and sex; Chewing tobacco product                                                                                      | Effect sizes reported for different chewing tobacco definitions; Adjusted for non-exclusive samples by a factor of 3                                                                                                                                                                            |
| Lohe 2010         | Lip and oral cavity cancer | Both   | 2.40 | 0.99 | Geographically representative; Representative; Maximally adjusted; Adjusted for smoking, age, and sex; Chewing tobacco product                                                                                      |                                                                                                                                                                                                                                                                                                 |
| Lohe 2010         | Lip and oral cavity cancer | Both   | 0.71 | 0.66 | Geographically representative; Representative; Maximally adjusted; Adjusted for smoking, age, and sex                                                                                                               |                                                                                                                                                                                                                                                                                                 |
| Madani 2010       | Lip and oral cavity cancer | Both   | 2.52 | 0.97 | Geographically representative; Representative; Chewing tobacco temporality; Chewing tobacco product                                                                                                                 | Effect sizes reported for different chewing tobacco definitions. This study also reported effect sizes derived from different models with the same degree of adjustment (all adjusting for smoking and a varied set of other confounders); Adjusted for non-exclusive samples by a factor of 10 |
| Madani 2010       | Lip and oral cavity cancer | Both   | 1.81 | 0.72 | Geographically representative; Representative; Chewing tobacco temporality; Chewing tobacco product                                                                                                                 |                                                                                                                                                                                                                                                                                                 |
| Madani 2010       | Lip and oral cavity cancer | Both   | 2.48 | 0.96 | Geographically representative; Representative; Chewing tobacco temporality; Chewing tobacco product                                                                                                                 |                                                                                                                                                                                                                                                                                                 |
| Madani 2010       | Lip and oral cavity cancer | Both   | 2.07 | 0.71 | Geographically representative; Representative; Chewing tobacco temporality; Chewing tobacco product                                                                                                                 |                                                                                                                                                                                                                                                                                                 |
| Madani 2010       | Lip and oral cavity cancer | Both   | 2.54 | 0.97 | Geographically representative; Representative; Chewing tobacco temporality; Chewing tobacco product                                                                                                                 |                                                                                                                                                                                                                                                                                                 |
| Madani 2010       | Lip and oral cavity cancer | Both   | 2.03 | 0.72 | Geographically representative; Representative; Chewing tobacco temporality; Chewing tobacco product                                                                                                                 |                                                                                                                                                                                                                                                                                                 |
| Madani 2010       | Lip and oral cavity cancer | Both   | 2.49 | 0.95 | Geographically representative; Representative; Chewing tobacco temporality; Chewing tobacco product                                                                                                                 |                                                                                                                                                                                                                                                                                                 |
| Madani 2010       | Lip and oral cavity cancer | Both   | 2.12 | 0.71 | Geographically representative; Representative; Chewing tobacco temporality; Chewing tobacco product                                                                                                                 |                                                                                                                                                                                                                                                                                                 |
| Madani 2010       | Lip and oral cavity cancer | Both   | 2.55 | 0.48 | Geographically representative; Representative; Chewing tobacco temporality; Chewing tobacco product                                                                                                                 |                                                                                                                                                                                                                                                                                                 |

|                 |                            |        |       |      |                                                                                                                                                             |                                                                                                                      |
|-----------------|----------------------------|--------|-------|------|-------------------------------------------------------------------------------------------------------------------------------------------------------------|----------------------------------------------------------------------------------------------------------------------|
| Madani 2010     | Lip and oral cavity cancer | Both   | 1.89  | 0.70 | Geographically representative; Representative; Chewing tobacco temporality; Chewing tobacco product                                                         |                                                                                                                      |
| Mahapatra 2015  | Lip and oral cavity cancer | Both   | 1.63  | 0.59 | Geographically representative; Representative; Chewing tobacco temporality; Chewing tobacco product                                                         | Effect sizes reported for different chewing tobacco definitions; Adjusted for non-exclusive samples by a factor of 2 |
| Mahapatra 2015  | Lip and oral cavity cancer | Both   | 1.79  | 0.69 | Geographically representative; Representative; Chewing tobacco temporality                                                                                  |                                                                                                                      |
| Mashberg 1993   | Lip and oral cavity cancer | Male   | 0.00  | 0.18 | Geographically representative; Representative; Chewing tobacco temporality; Aggregate outcome definition                                                    |                                                                                                                      |
| Mashberg 1993   | Other pharynx cancer       | Male   | 0.00  | 0.18 | Geographically representative; Representative; Chewing tobacco temporality; Aggregate outcome definition                                                    |                                                                                                                      |
| Mateen 2012     | Stroke                     | Both   | 0.86  | 0.25 | Geographically representative; Representative; Maximally adjusted; Adjusted for smoking, age, and sex; Chewing tobacco temporality; Chewing tobacco product |                                                                                                                      |
| Mekala 2020     | Lip and oral cavity cancer | Both   | 0.67  | 0.13 | Geographically representative; Representative; Maximally adjusted; Adjusted for smoking, age, and sex; Chewing tobacco temporality                          |                                                                                                                      |
| Merchant 2000   | Lip and oral cavity cancer | Both   | 2.13  | 0.66 | Geographically representative; Representative; Chewing tobacco temporality; Chewing tobacco product                                                         |                                                                                                                      |
| Merchant 2015   | Lip and oral cavity cancer | Both   | 2.75  | 0.74 | Geographically representative; Representative; Chewing tobacco temporality; Chewing tobacco product                                                         |                                                                                                                      |
| Muwonge 2008    | Lip and oral cavity cancer | Both   | 1.46  | 0.17 | Geographically representative                                                                                                                               |                                                                                                                      |
| Nandakumar 1990 | Lip and oral cavity cancer | Both   | 2.56  | 0.22 | Geographically representative; Representative; Maximally adjusted; Adjusted for smoking, age, and sex; Chewing tobacco temporality; Chewing tobacco product |                                                                                                                      |
| Nandakumar 1996 | Esophageal cancer          | Female | 0.79  | 0.22 | Geographically representative; Representative; Maximally adjusted; Adjusted for smoking, age, and sex; Sub-population                                       | Sex-specific effect sizes were reported in the absence of an effect size for both sexes.                             |
| Nandakumar 1996 | Esophageal cancer          | Male   | 1.06  | 0.33 | Geographically representative; Representative; Sub-population                                                                                               |                                                                                                                      |
| Nayar 2000      | Esophageal cancer          | Both   | 0.95  | 0.37 | Geographically representative; Representative; Chewing tobacco product                                                                                      |                                                                                                                      |
| Ngelangel 2009  | Lip and oral cavity cancer | Both   | 1.64  | 0.68 | Geographically representative; Representative; Maximally adjusted; Adjusted for smoking, age, and sex; Adjusted for age and sex                             |                                                                                                                      |
| Notani 1988     | Esophageal cancer          | Male   | 0.41  | 0.32 | Geographically representative; Representative; Maximally adjusted                                                                                           |                                                                                                                      |
| Notani 1988     | Larynx cancer              | Male   | 0.59  | 0.55 | Geographically representative; Representative; Maximally adjusted                                                                                           |                                                                                                                      |
| Notani 1988     | Lip and oral cavity cancer | Male   | 1.36  | 0.31 | Geographically representative; Representative; Maximally adjusted                                                                                           |                                                                                                                      |
| Notani 1988     | Nasopharynx cancer         | Male   | 0.83  | 0.33 | Geographically representative; Representative; Maximally adjusted; Aggregate outcome definition                                                             |                                                                                                                      |
| Notani 1988     | Other pharynx cancer       | Male   | 0.83  | 0.33 | Geographically representative; Representative; Maximally adjusted; Aggregate outcome definition                                                             |                                                                                                                      |
| Panwar 2011     | Ischemic heart disease     | Both   | -0.37 | 0.22 | Geographically representative; Representative; Maximally adjusted; Adjusted for smoking, age, and sex; Chewing tobacco temporality                          |                                                                                                                      |
| Phukan 2001     | Esophageal cancer          | Female | 1.22  | 0.37 | Geographically representative; Chewing tobacco temporality; Chewing tobacco product; Sub-population                                                         | Sex-specific effect sizes were reported in the absence of an effect size for both sexes.                             |
| Phukan 2001     | Esophageal cancer          | Male   | 1.59  | 0.36 | Geographically representative; Chewing tobacco temporality; Chewing tobacco product; Sub-population                                                         |                                                                                                                      |

|             |                            |      |       |      |                                                                                                                                                                                            |                                                                                                                      |
|-------------|----------------------------|------|-------|------|--------------------------------------------------------------------------------------------------------------------------------------------------------------------------------------------|----------------------------------------------------------------------------------------------------------------------|
| Radoi 2013  | Lip and oral cavity cancer | Both | 1.48  | 1.01 | Geographically representative; Chewing tobacco temporality                                                                                                                                 |                                                                                                                      |
| Rahman 2008 | Ischemic heart disease     | Both | 1.34  | 0.36 | Geographically representative; Representative; Maximally adjusted; Adjusted for smoking, age, and sex; Chewing tobacco temporality; Chewing tobacco product                                |                                                                                                                      |
| Rahman 2012 | Ischemic heart disease     | Both | -0.45 | 0.34 | Geographically representative; Chewing tobacco product                                                                                                                                     | Effect sizes reported for different chewing tobacco definitions; Adjusted for non-exclusive samples by a factor of 2 |
| Rahman 2012 | Ischemic heart disease     | Both | 0.10  | 0.76 | Geographically representative; Chewing tobacco temporality; Chewing tobacco product                                                                                                        |                                                                                                                      |
| Ram 2012    | Ischemic heart disease     | Both | 1.18  | 0.36 | Geographically representative; Representative; Maximally adjusted; Adjusted for smoking, age, and sex; Chewing tobacco temporality                                                         |                                                                                                                      |
| Rao 1994    | Lip and oral cavity cancer | Male | 1.08  | 0.12 | Geographically representative; Representative; Maximally adjusted; Adjusted for smoking, age, and sex; Adjusted for age and sex; Chewing tobacco temporality                               |                                                                                                                      |
| Rao 1998    | Lip and oral cavity cancer | Male | 0.12  | 0.13 | Geographically representative; Representative; Chewing tobacco temporality                                                                                                                 |                                                                                                                      |
| Rao 1999    | Larynx cancer              | Male | 0.10  | 0.15 | Geographically representative; Representative; Maximally adjusted; Adjusted for smoking, age, and sex; Adjusted for age and sex; Chewing tobacco temporality                               |                                                                                                                      |
| Rao 1999    | Other pharynx cancer       | Male | 0.10  | 0.10 | Geographically representative; Representative; Maximally adjusted; Adjusted for smoking, age, and sex; Adjusted for age and sex; Chewing tobacco temporality                               | Effect sizes reported for each component of other pharynx cancer (oropharynx cancer and hypopharynx cancer).         |
| Rao 1999    | Other pharynx cancer       | Male | -0.36 | 0.23 | Geographically representative; Representative; Maximally adjusted; Adjusted for smoking, age, and sex; Adjusted for age and sex; Chewing tobacco temporality                               |                                                                                                                      |
| Ray 2013    | Lip and oral cavity cancer | Both | 1.89  | 0.23 | Geographically representative; Representative; Maximally adjusted; Adjusted for smoking, age, and sex; Adjusted for age and sex; Chewing tobacco temporality                               |                                                                                                                      |
| Ruwali 2009 | Larynx cancer              | Male | 0.73  | 0.16 | Geographically representative; Representative; Maximally adjusted; Adjusted for smoking, age, and sex; Adjusted for age and sex; Chewing tobacco temporality; Aggregate outcome definition |                                                                                                                      |
| Ruwali 2009 | Lip and oral cavity cancer | Male | 0.73  | 0.16 | Geographically representative; Representative; Maximally adjusted; Adjusted for smoking, age, and sex; Adjusted for age and sex; Chewing tobacco temporality; Aggregate outcome definition |                                                                                                                      |
| Ruwali 2009 | Other pharynx cancer       | Male | 0.73  | 0.16 | Geographically representative; Representative; Maximally adjusted; Adjusted for smoking, age, and sex; Adjusted for age and sex; Chewing tobacco temporality; Aggregate outcome definition |                                                                                                                      |
| Ruwali 2011 | Larynx cancer              | Male | 0.73  | 0.13 | Geographically representative; Representative; Chewing tobacco temporality; Aggregate outcome definition                                                                                   |                                                                                                                      |
| Ruwali 2011 | Lip and oral cavity cancer | Male | 0.73  | 0.13 | Geographically representative; Representative; Chewing tobacco temporality; Aggregate outcome definition                                                                                   |                                                                                                                      |
| Ruwali 2011 | Nasopharynx cancer         | Male | 0.73  | 0.13 | Geographically representative; Representative; Chewing tobacco temporality; Aggregate outcome definition                                                                                   |                                                                                                                      |
| Ruwali 2011 | Other pharynx cancer       | Male | 0.73  | 0.13 | Geographically representative; Representative; Chewing tobacco temporality; Aggregate outcome definition                                                                                   |                                                                                                                      |

|                        |                            |      |       |      |                                                                                                                                                                                       |                                                                                                                                                                                                       |
|------------------------|----------------------------|------|-------|------|---------------------------------------------------------------------------------------------------------------------------------------------------------------------------------------|-------------------------------------------------------------------------------------------------------------------------------------------------------------------------------------------------------|
| Saikia 2015            | Esophageal cancer          | Both | 1.08  | 0.92 | Geographically representative; Representative; Maximally adjusted; Adjusted for smoking, age, and sex; Chewing tobacco temporality                                                    |                                                                                                                                                                                                       |
| Sam 2007               | Larynx cancer              | Both | 1.83  | 0.21 | Geographically representative; Representative; Maximally adjusted; Adjusted for smoking, age, and sex; Chewing tobacco temporality; Aggregate outcome definition                      |                                                                                                                                                                                                       |
| Sam 2007               | Lip and oral cavity cancer | Both | 1.83  | 0.21 | Geographically representative; Representative; Maximally adjusted; Adjusted for smoking, age, and sex; Chewing tobacco temporality; Aggregate outcome definition                      |                                                                                                                                                                                                       |
| Sam 2007               | Nasopharynx cancer         | Both | 1.83  | 0.21 | Geographically representative; Representative; Maximally adjusted; Adjusted for smoking, age, and sex; Chewing tobacco temporality; Aggregate outcome definition                      |                                                                                                                                                                                                       |
| Sam 2007               | Other pharynx cancer       | Both | 1.83  | 0.21 | Geographically representative; Representative; Maximally adjusted; Adjusted for smoking, age, and sex; Chewing tobacco temporality; Aggregate outcome definition                      |                                                                                                                                                                                                       |
| Sam 2010               | Larynx cancer              | Both | 1.73  | 0.19 | Geographically representative; Representative; Maximally adjusted; Chewing tobacco temporality; Aggregate outcome definition                                                          |                                                                                                                                                                                                       |
| Sam 2010               | Lip and oral cavity cancer | Both | 1.73  | 0.19 | Geographically representative; Representative; Maximally adjusted; Chewing tobacco temporality; Aggregate outcome definition                                                          |                                                                                                                                                                                                       |
| Sam 2010               | Nasopharynx cancer         | Both | 1.73  | 0.19 | Geographically representative; Representative; Maximally adjusted; Chewing tobacco temporality; Aggregate outcome definition                                                          |                                                                                                                                                                                                       |
| Sam 2010               | Other pharynx cancer       | Both | 1.73  | 0.19 | Geographically representative; Representative; Maximally adjusted; Chewing tobacco temporality; Aggregate outcome definition                                                          |                                                                                                                                                                                                       |
| Sankaranarayana n 1989 | Lip and oral cavity cancer | Both | 1.42  | 0.18 | Geographically representative; Representative; Maximally adjusted; Adjusted for smoking, age, and sex; Chewing tobacco temporality; Chewing tobacco product                           | These effect sizes were reported in two different studies published with the same lead author in the same year. They are reported for two different component cancers of lip and oral cavity cancers. |
| Sankaranarayana n 1989 | Lip and oral cavity cancer | Both | 2.23  | 0.23 | Geographically representative; Representative; Maximally adjusted; Adjusted for smoking, age, and sex; Adjusted for age and sex; Chewing tobacco temporality; Chewing tobacco product |                                                                                                                                                                                                       |
| Sankaranarayana n 1990 | Esophageal cancer          | Male | 0.11  | 0.18 | Geographically representative; Representative; Maximally adjusted; Adjusted for smoking, age, and sex; Adjusted for age and sex; Chewing tobacco temporality; Chewing tobacco product |                                                                                                                                                                                                       |
| Sankaranarayana n 1990 | Lip and oral cavity cancer | Both | 2.21  | 0.16 | Geographically representative; Representative; Maximally adjusted; Adjusted for smoking, age, and sex; Adjusted for age and sex; Chewing tobacco temporality; Chewing tobacco product |                                                                                                                                                                                                       |
| Sankaranarayana n 1991 | Esophageal cancer          | Both | 0.08  | 0.14 | Geographically representative; Representative; Maximally adjusted; Adjusted for smoking, age, and sex; Adjusted for age and sex; Chewing tobacco temporality; Chewing tobacco product |                                                                                                                                                                                                       |
| Sapkota 2007           | Larynx cancer              | Both | -0.29 | 0.30 | Geographically representative; Representative; Chewing tobacco temporality; Sub-population                                                                                            |                                                                                                                                                                                                       |
| Sapkota 2007           | Other pharynx cancer       | Both | 0.41  | 0.17 | Geographically representative; Representative; Chewing tobacco temporality; Sub-population                                                                                            |                                                                                                                                                                                                       |
| Sharma 2013            | Esophageal cancer          | Both | 1.21  | 0.24 | Geographically representative; Representative; Maximally adjusted; Adjusted for smoking, age, and sex; Adjusted for age and sex; Chewing tobacco product; Sub-population              | Effect sizes reported for two distinct geographic regions with no aggregate effect size reported.                                                                                                     |
| Sharma 2013            | Esophageal cancer          | Both | 0.00  | 0.51 | Geographically representative; Representative; Maximally adjusted; Adjusted for smoking, age, and sex; Adjusted for age and sex; Chewing tobacco product; Sub-population              |                                                                                                                                                                                                       |

|             |                            |      |      |      |                                                                                                                                                                                            |
|-------------|----------------------------|------|------|------|--------------------------------------------------------------------------------------------------------------------------------------------------------------------------------------------|
| Sharma 2019 | Lip and oral cavity cancer | Both | 1.32 | 0.37 | Geographically representative; Representative; Maximally adjusted; Adjusted for smoking, age, and sex; Adjusted for age and sex                                                            |
| Sikdar 2004 | Lip and oral cavity cancer | Both | 0.97 | 0.26 | Geographically representative; Representative; Maximally adjusted; Adjusted for smoking, age, and sex; Adjusted for age and sex; Chewing tobacco temporality                               |
| Singh 2008  | Larynx cancer              | Male | 2.03 | 0.33 | Geographically representative; Representative; Maximally adjusted; Chewing tobacco temporality; Sub-population; Aggregate outcome definition                                               |
| Singh 2008  | Lip and oral cavity cancer | Male | 2.03 | 0.33 | Geographically representative; Representative; Maximally adjusted; Chewing tobacco temporality; Sub-population; Aggregate outcome definition                                               |
| Singh 2008  | Nasopharynx cancer         | Male | 2.03 | 0.33 | Geographically representative; Representative; Maximally adjusted; Chewing tobacco temporality; Sub-population; Aggregate outcome definition                                               |
| Singh 2008  | Other pharynx cancer       | Male | 2.03 | 0.33 | Geographically representative; Representative; Maximally adjusted; Chewing tobacco temporality; Sub-population; Aggregate outcome definition                                               |
| Singh 2009  | Larynx cancer              | Male | 0.51 | 0.22 | Geographically representative; Representative; Maximally adjusted; Adjusted for smoking, age, and sex; Adjusted for age and sex; Chewing tobacco temporality; Aggregate outcome definition |
| Singh 2009  | Lip and oral cavity cancer | Male | 0.51 | 0.22 | Geographically representative; Representative; Maximally adjusted; Adjusted for smoking, age, and sex; Adjusted for age and sex; Chewing tobacco temporality; Aggregate outcome definition |
| Singh 2009  | Nasopharynx cancer         | Male | 0.51 | 0.22 | Geographically representative; Representative; Maximally adjusted; Adjusted for smoking, age, and sex; Adjusted for age and sex; Chewing tobacco temporality; Aggregate outcome definition |
| Singh 2009  | Other pharynx cancer       | Male | 0.51 | 0.22 | Geographically representative; Representative; Maximally adjusted; Adjusted for smoking, age, and sex; Adjusted for age and sex; Chewing tobacco temporality; Aggregate outcome definition |
| Singh 2014  | Lip and oral cavity cancer | Both | 1.52 | 0.32 | Geographically representative; Representative; Maximally adjusted; Adjusted for smoking, age, and sex; Adjusted for age and sex; Chewing tobacco temporality; Sub-population               |
| Soya 2007   | Larynx cancer              | Both | 1.70 | 0.18 | Geographically representative; Representative; Maximally adjusted; Adjusted for smoking, age, and sex; Chewing tobacco temporality; Aggregate outcome definition                           |
| Soya 2007   | Lip and oral cavity cancer | Both | 1.70 | 0.18 | Geographically representative; Representative; Maximally adjusted; Adjusted for smoking, age, and sex; Chewing tobacco temporality; Aggregate outcome definition                           |
| Soya 2007   | Nasopharynx cancer         | Both | 1.70 | 0.18 | Geographically representative; Representative; Maximally adjusted; Adjusted for smoking, age, and sex; Chewing tobacco temporality; Aggregate outcome definition                           |
| Soya 2007   | Other pharynx cancer       | Both | 1.70 | 0.18 | Geographically representative; Representative; Maximally adjusted; Adjusted for smoking, age, and sex; Chewing tobacco temporality; Aggregate outcome definition                           |



|                 |                            |      |       |      |                                                                                                                                                                             |                                                                                                                                                                                                                                    |
|-----------------|----------------------------|------|-------|------|-----------------------------------------------------------------------------------------------------------------------------------------------------------------------------|------------------------------------------------------------------------------------------------------------------------------------------------------------------------------------------------------------------------------------|
| Subapriya 2007  | Lip and oral cavity cancer | Both | 1.06  | 1.31 | Geographically representative; Representative; Maximally adjusted; Adjusted for smoking, age, and sex; Chewing tobacco temporality; Sub-population                          | Effect sizes reported for different chewing tobacco definitions; Adjusted for non-exclusive samples by a factor of 2                                                                                                               |
| Subapriya 2007  | Lip and oral cavity cancer | Both | 1.16  | 1.31 | Geographically representative; Representative; Maximally adjusted; Adjusted for smoking, age, and sex; Chewing tobacco temporality; Chewing tobacco product; Sub-population |                                                                                                                                                                                                                                    |
| Talukdar 2013   | Esophageal cancer          | Both | 0.97  | 0.28 | Geographically representative; Representative; Chewing tobacco temporality                                                                                                  |                                                                                                                                                                                                                                    |
| Teo 2006        | Ischemic heart disease     | Both | 0.45  | 0.12 | Geographically representative; Representative; Chewing tobacco temporality                                                                                                  |                                                                                                                                                                                                                                    |
| Timberlake 2017 | Ischemic heart disease     | Both | 0.10  | 0.12 | Maximally adjusted; Adjusted for smoking, age, and sex                                                                                                                      |                                                                                                                                                                                                                                    |
| Wasnik 1998     | Other pharynx cancer       | Both | 2.08  | 0.28 | Geographically representative; Representative; Chewing tobacco temporality                                                                                                  |                                                                                                                                                                                                                                    |
| Wynder 1977     | Esophageal cancer          | Male | 0.21  | 0.25 | Geographically representative; Representative; Maximally adjusted; Adjusted for smoking, age, and sex; Chewing tobacco temporality                                          |                                                                                                                                                                                                                                    |
| Wynder 1977     | Larynx cancer              | Male | 0.30  | 0.17 | Geographically representative; Representative; Maximally adjusted; Adjusted for smoking, age, and sex; Chewing tobacco temporality                                          |                                                                                                                                                                                                                                    |
| Wynder 1977     | Lip and oral cavity cancer | Male | 0.14  | 0.15 | Geographically representative; Representative; Maximally adjusted; Adjusted for smoking, age, and sex; Chewing tobacco temporality                                          |                                                                                                                                                                                                                                    |
| Wyss 2016       | Larynx cancer              | Both | 0.10  | 0.17 | Geographically representative; Representative; Chewing tobacco temporality; Sub-population                                                                                  |                                                                                                                                                                                                                                    |
| Wyss 2016       | Lip and oral cavity cancer | Both | -0.06 | 0.13 | Geographically representative; Representative; Chewing tobacco temporality; Aggregate outcome definition                                                                    | This study reported effect sizes for different mutually exclusive groupings of smoking statuses (eg. Ever smokers and Never smokers) and for different subtypes of lip and oral cavity cancer, including gum cancer.               |
| Wyss 2016       | Lip and oral cavity cancer | Both | 0.25  | 0.21 | Geographically representative; Representative; Chewing tobacco temporality; Sub-population                                                                                  |                                                                                                                                                                                                                                    |
| Wyss 2016       | Lip and oral cavity cancer | Both | -0.16 | 0.32 | Geographically representative; Representative; Chewing tobacco temporality; Sub-population                                                                                  |                                                                                                                                                                                                                                    |
| Wyss 2016       | Lip and oral cavity cancer | Both | 1.12  | 0.52 | Geographically representative; Representative; Chewing tobacco temporality; Sub-population                                                                                  |                                                                                                                                                                                                                                    |
| Wyss 2016       | Lip and oral cavity cancer | Both | -0.14 | 0.16 | Geographically representative; Representative; Chewing tobacco temporality; Sub-population                                                                                  |                                                                                                                                                                                                                                    |
| Wyss 2016       | Lip and oral cavity cancer | Both | 0.59  | 0.28 | Geographically representative; Representative; Chewing tobacco temporality; Sub-population                                                                                  |                                                                                                                                                                                                                                    |
| Wyss 2016       | Lip and oral cavity cancer | Both | -0.29 | 0.54 | Geographically representative; Representative; Chewing tobacco temporality; Sub-population                                                                                  |                                                                                                                                                                                                                                    |
| Wyss 2016       | Lip and oral cavity cancer | Both | -0.02 | 0.28 | Geographically representative; Representative; Chewing tobacco temporality; Sub-population; Aggregate outcome definition                                                    |                                                                                                                                                                                                                                    |
| Wyss 2016       | Nasopharynx cancer         | Both | -0.07 | 0.13 | Geographically representative; Representative; Chewing tobacco temporality; Aggregate outcome definition                                                                    | This study reported effect sizes for different mutually exclusive groupings of smoking statuses (eg. Ever smokers and Never smokers).                                                                                              |
| Wyss 2016       | Nasopharynx cancer         | Both | 0.04  | 0.26 | Geographically representative; Representative; Chewing tobacco temporality; Sub-population; Aggregate outcome definition                                                    |                                                                                                                                                                                                                                    |
| Wyss 2016       | Other pharynx cancer       | Both | -0.06 | 0.13 | Geographically representative; Representative; Chewing tobacco temporality; Aggregate outcome definition                                                                    | This study reported effect sizes for different mutually exclusive groupings of smoking statuses (eg. Ever smokers and Never smokers) and for different subtypes of other pharynx cancer (oropharynx cancer and hypopharynx cancer) |
| Wyss 2016       | Other pharynx cancer       | Both | -0.13 | 0.29 | Geographically representative; Representative; Chewing tobacco temporality; Sub-population                                                                                  |                                                                                                                                                                                                                                    |
| Wyss 2016       | Other pharynx cancer       | Both | 0.54  | 0.68 | Geographically representative; Representative; Chewing tobacco temporality; Sub-population                                                                                  |                                                                                                                                                                                                                                    |
| Wyss 2016       | Other pharynx cancer       | Both | -0.02 | 0.28 | Geographically representative; Representative; Chewing tobacco temporality; Sub-population; Aggregate outcome definition                                                    |                                                                                                                                                                                                                                    |
| Yadav 2008      | Larynx cancer              | Male | 1.85  | 0.23 | Geographically representative; Representative; Chewing tobacco temporality; Sub-population; Aggregate outcome definition                                                    |                                                                                                                                                                                                                                    |

|            |                            |      |      |      |                                                                                                                                                              |
|------------|----------------------------|------|------|------|--------------------------------------------------------------------------------------------------------------------------------------------------------------|
| Yadav 2008 | Lip and oral cavity cancer | Male | 1.85 | 0.23 | Geographically representative; Representative; Chewing tobacco temporality; Sub-population; Aggregate outcome definition                                     |
| Yadav 2008 | Nasopharynx cancer         | Male | 1.85 | 0.23 | Geographically representative; Representative; Chewing tobacco temporality; Sub-population; Aggregate outcome definition                                     |
| Yadav 2008 | Other pharynx cancer       | Male | 1.85 | 0.23 | Geographically representative; Representative; Chewing tobacco temporality; Sub-population; Aggregate outcome definition                                     |
| Yadav 2010 | Lip and oral cavity cancer | Both | 0.89 | 0.26 | Geographically representative; Representative; Chewing tobacco temporality                                                                                   |
| Znaor 2003 | Esophageal cancer          | Male | 0.72 | 0.12 | Geographically representative; Representative; Chewing tobacco temporality                                                                                   |
| Znaor 2003 | Lip and oral cavity cancer | Male | 1.62 | 0.09 | Geographically representative; Representative; Chewing tobacco temporality                                                                                   |
| Znaor 2003 | Other pharynx cancer       | Male | 0.60 | 0.12 | Geographically representative; Representative; Maximally adjusted; Adjusted for smoking, age, and sex; Adjusted for age and sex; Chewing tobacco temporality |

## Section 3: Supplementary Methods

### *Section 3.1: Umbrella review*

For future GBD rounds and the present study, there was interest in evaluating new risk-outcome pairs that are not currently within the GBD framework for chewing tobacco. To identify new outcomes of public health interest that are likely to have sufficient relevant data to merit a comprehensive systematic review, we conducted an internal umbrella review in March 2021. We used the following search string to identify all meta-analyses and systematic reviews regarding the health risks associated with smokeless tobacco that are indexed in PubMed. It returned 1,102 total hits. One member of the research team screened these results for studies that mentioned being a meta-analysis or systematic review in the title or abstract and categorized these into outcome groupings based on the outcomes of interest described in the publication. A total of 45 meta-analysis/systematic reviews were identified among the 1,102 hits.

We reviewed the full texts of the meta-analysis/systematic reviews that covered outcomes that were discussed by more than one meta-analysis/systematic review according to our categorization. These full texts were evaluated on the basis of available evidence related to chewing tobacco and overall findings. Following this review, we found that there was insufficient data for pancreatic cancer, while meta-analyses regarding smokeless tobacco and cardiovascular diseases, particularly stroke and ischemic heart disease, and smokeless tobacco and head and neck cancers reported mixed findings with sufficient underlying data to indicate that a full systematic review was feasible and merited the application of the Burden of Proof approach.

#### **Section 3.1.1: PubMed Umbrella Review Search String**

("smokeless tobacco"[tiab] OR "Tobacco, Smokeless"[Mesh] OR "Dipping Tobacco"[tiab] OR "Oral Tobacco"[tiab] OR *bajjar*[tiab] OR ("betel quid"[tiab] AND tobacco[tiab]) OR "chewing tobacco"[tiab] OR *chimó*[tiab] OR *snuff*[tiab] OR *snuif*[tiab] OR *dip*[tiab] OR *dohra*[tiab] OR *gudakhu*[tiab] OR *gul*[tiab] OR *gutka*[tiab] OR *gutkha*[tiab] OR "hnat hsey"[tiab] OR *iq'mik*[tiab] OR *khaini*[tiab] OR *kharra*[tiab] OR *khiwam*[tiab] OR *khimam*[tiab] OR *kiwam*[tiab] OR *kimam*[tiab] OR "lal dant manjan"[tiab] OR "loose

leaf"[tiab] AND (chew[tiab] OR tobacco[tiab])) OR mainpuri[tiab] OR maras[tiab] OR mawa[tiab] OR mshri[tiab] OR naffa[tiab] OR nas[Supplementary Concept] OR ((nas[tiab] OR nass[tiab]) AND tobacco[tiab]) OR naswar[tiab] OR nasway[tiab] OR nasvay[tiab] OR neffa[tiab] OR((pan[tiab] OR paan[tiab]) AND tobacco[tiab]) OR (plug[tiab] AND tobacco[tiab]) OR (rapé[tiab] AND tobacco[tiab]) OR ((red[tiab] OR tobacco[tiab]) AND (toothpowder[tiab] OR toothpaste[tiab])) OR shammah[tiab] OR snus[tiab] OR taaba[tiab] OR tapkeer[tiab] OR tawa[tiab] OR tombol[tiab] OR toombak[tiab] OR tuibur[tiab] OR "tobacco water"[tiab] OR (twist[tiab] AND tobacco[tiab]) OR zarda[tiab]) AND ("Risk"[Mesh] OR "relative risk"[tiab] OR "hazard ratio"[tiab] OR "odds ratio"[tiab] OR "rate"[tiab] OR "risk"[tiab]) AND ("Cohort Studies"[Mesh] OR "Prospective Studies"[Mesh] OR "Cohort"[tiab] OR "prospective"[tiab] OR "longitudinal"[tiab] OR "Case-Control Studies"[Mesh] OR "case-control"[tiab] OR "case control"[tiab] OR "case-crossover"[tiab]) AND ("1970/01/01"[PDat] : "2021/12/31"[PDat]) NOT (animals[MeSH] NOT humans[MeSH])

**Table S6: Outcome groupings of MA/SRs identified in the umbrella review**

| Outcome                 | MA/SR Count |
|-------------------------|-------------|
| Oral cancer             | 8           |
| CVD                     | 3           |
| Circulatory diseases    | 2           |
| Head and neck cancers   | 2           |
| Pancreatic cancer       | 2           |
| Diabetes                | 1           |
| Stroke*                 | 1           |
| Coronary heart disease* | 1           |
| Dental caries           | 1           |

\*Considered in conjunction with the broad cardiovascular disease and circulatory diseases meta-analyses since they would be encompassed in these disease groupings.

### *Section 3.2: The Scope of the Systematic Literature Reviews*

We aimed to capture all existing literature pertaining to the relationship between chewing tobacco use and the seven health outcomes of interest. To do so, we conducted three systematic reviews, each spanning the literature indexed in PubMed, Global Index Medicus, and Web of Science from January 1, 1970 through January 30, 2023. The systematic reviews were managed separately for head and neck cancers, ischemic heart disease, and stroke using Covidence, a systematic review management tool<sup>3</sup>. Each systematic review followed the same protocol:

1. Search string hits for the three databases were uploaded to Covidence for automated de-duplication. Due to limitations in the Covidence platform, any updates needed to be de-duplicated against old hits using Zotero, a citation management tool that was better suited for this purpose.

2. Two independent screeners reviewed the title and abstract of each study report using the pre-determined inclusion and exclusion criteria described above. At the title and abstract screening phase, screeners were not required to specify an exclusion reason for studies that were excluded, but they were directed to be generous in their inclusion to ensure studies with potentially relevant information were not erroneously excluded. Conflicts were resolved by a third reviewer who sought input from other team members if they were uncertain of the appropriate decision. At this stage, special cases (non-English sources and meta-analyses/systematic reviews) were tagged accordingly and included.
3. Two independent screeners reviewed the full text of each study report that were included after the title and abstract phase. To exclude a source, the screeners had to specify an exclusion reason. Conflicts were resolved by a third reviewer who requested feedback from other team members if the appropriate response was uncertain. Any special cases that were not flagged in the title and abstract phase were tagged at this stage. If reviewers identified study populations that were reported by the two or more study reports, these reports were merged to account for a single study and prevent unnecessary duplication.
  - a. Meta-analyses/Systematic reviews: These were evaluated based on their title and abstract and full text by two independent screeners and included if they likely captured studies that would meet our inclusion criteria. They were excluded if their focus was entirely extraneous. The citations of included meta-analyses/systematic reviews were reviewed by one screener for potentially relevant underlying studies based on mentions of chewing tobacco, relevant outcomes, and relevant study design. Potentially relevant underlying studies were deduplicated against those mentioned against themselves and against studies that were already included in the primary review. One screener reviewed the title and abstracts of unique new potentially relevant underlying sources, followed by two independent screeners that reviewed the full text of any included sources. Similar to the primary review, a third member of the team resolved any conflicts. Included underlying studies were uploaded to Covidence to be extracted alongside sources from the primary review.
  - b. Non-English sources: These sources were evaluated using the same standard protocol as English language sources in the primary review with two independent reviewers for both title/abstract screening and full text screening. When possible, at least one of the two independent reviewers would be an individual sought out for their relevant language skills. If no reviewer or only one reviewer could be found for a given language, team members reviewed the source for inclusion and exclusion using a free online translation tool.
4. Studies that were included after full text review were extracted by a single reviewer using a standardized extraction template.
5. Completed extractions were reviewed and manually vetted for accuracy by a second team member to generate a final dataset.

**Table S7: Data inputs for the relative risks of chewing tobacco use**

|                  | Total unique sources | Total source-outcome combinations |
|------------------|----------------------|-----------------------------------|
| Dichotomous risk | 103                  | 176                               |

### Section 3.3: Study Quality and Bias Assessment

We used a covariate selection algorithm that systematically detects eligible covariates that reflected a significant source of bias in the included observations. The method used to evaluate eligible covariates is outlined in more detail in Zheng et al. and in the main manuscript. We created 10 potential bias covariates that were evaluated for their eligibility to be tested in the algorithm and potentially included in the model. The ‘gold standard’ value was coded as 0, while the alternatives were coded as 1. The covariates were defined as follows:

#### Level of adjustment for potential confounding variables:

Three bias covariates were generated as a cascading dummy reflecting different levels of adjustment. Gold standard **maximally adjusted** (adj\_L0) observations correspond to estimates that were maximally adjusted for age, sex, smoking, and at minimum one other potential confounder. Gold standard **adjusted for smoking, age, and sex** (adj\_L1) observations are those that at minimum account for participants’ smoking status, age, and sex. Gold standard **adjusted for age and sex** (adj\_L2) observations are any that at least control for the age and sex of participants, regardless of their controlling of other potential confounders.

**Table S8: Setting up the bias covariates to evaluate the level of adjustment of included data points**

| Level of adjustment | Definition                                                                              | Cascading dummy |    |    |
|---------------------|-----------------------------------------------------------------------------------------|-----------------|----|----|
|                     |                                                                                         | L0              | L1 | L2 |
| Insufficient        | Does not control for age and sex, regardless of whether it controls for other variables | 1               | 1  | 1  |
| Minimal             | Controls only for age and sex                                                           | 1               | 1  | 0  |
| Middle              | Controls for age, sex, and smoking                                                      | 1               | 0  | 0  |
| Maximal             | Controls for age, sex, smoking, and other confounders                                   | 0               | 0  | 0  |

#### Aggregate outcome definition:

Is the reported effect size calculated using an aggregate outcome definition that includes the outcome of interest? Gold standard observations were defined as effect sizes that were calculated using an outcome definition specific to the outcome of interest.

#### Chewing tobacco product:

Is the reported effect size calculated using an exposure definition that encompasses chewing tobacco broadly or a specific chewing tobacco product? Gold standard observations were calculated for chewing tobacco broadly.

Chewing tobacco temporality:

Is the reported effect size calculated using current chewing tobacco (product) use or ever chewing tobacco (product) use as the exposed group? Gold standard observations were those that used current exposure as the alternate group and non-current exposure as the reference group because current use more closely aligns with our exposure definition.

Sub-population:

Is the data point calculated from a sub-population of the total study sample? An example is a study that includes smokers and non-smokers but the observation only uses the data from non-smokers. Other examples include sex-specific observations in studies that were not sex-specific or observations for non-alcohol users in studies that included alcohol users. Gold standard observations were estimated from the entire study sample.

Geographical representativeness:

Is the study population geographically representative of the country or sub-national location the study was conducted based on Global Burden of Disease geographies? Studies were considered gold standard if they were geographically representative.

Representativeness:

Is the study sample representative of the location in which the study was conducted? For example, if the study was conducted in a specific neighborhood, the study sample should be representative of the neighborhood. The gold standard is that the study sample is representative of the study's defined geographic scope.

Outcome assessment:

How were the cases for the study ascertained? The gold standard is that outcomes were ascertained through physician diagnosis, disease registry, medical record review, or biomarker examination. The alternate for this bias covariate is that the outcome was self-reported by the study participants.

We did not create a potential bias covariate to evaluate the impact of selection bias because there was a very limited amount of data reporting loss to follow-up or percent for whom data was not ascertained, particularly since the vast majority of our studies use a case-control study design where percent not ascertained is infrequently reported. The high degree of missingness in this variable would create substantial obfuscation of the true patterns of impact selection bias may have had. We also did not create bias covariates for evaluating the form of exposure assessment and reverse causation. All of the studies identified used self-reported exposure data, which is considered gold standard for tobacco use research. For chewing tobacco, unlike for other risk factors, reverse causation is unlikely since individuals are not likely to take up the use of tobacco products when they are already sick with a tobacco-related outcome, so it was deemed to not be relevant for testing.

**Table S9: Bias Characteristics for Included Observations**

| Author           | Study design       | Health outcome    | Geographically representative | Representative | Maximally adjusted | Adjusted for smoking, age, and sex | Adjusted for age and sex | Chewing tobacco temporality | Chewing tobacco product | Outcome assessment | Sub-population | Aggregate outcome definition |
|------------------|--------------------|-------------------|-------------------------------|----------------|--------------------|------------------------------------|--------------------------|-----------------------------|-------------------------|--------------------|----------------|------------------------------|
| Akhtar 2012      | Case-control       | Esophageal cancer | 1                             | 1              | 0                  | 0                                  | 0                        | 1                           | 1                       | 0                  | 0              | 0                            |
| Chitra 2004      | Case-control       | Esophageal cancer | 1                             | 1              | 1                  | 1                                  | 0                        | 1                           | 0                       | 0                  | 0              | 0                            |
| Dar 2012         | Case-cohort        | Esophageal cancer | 1                             | 1              | 0                  | 0                                  | 0                        | 1                           | 1                       | 0                  | 0              | 0                            |
| Das 2017         | Case-control       | Esophageal cancer | 1                             | 1              | 1                  | 1                                  | 0                        | 0                           | 1                       | 0                  | 0              | 0                            |
| Das 2017         | Case-control       | Esophageal cancer | 1                             | 1              | 0                  | 0                                  | 0                        | 0                           | 1                       | 0                  | 0              | 0                            |
| Gajalakshmi 2012 | Case-control       | Esophageal cancer | 1                             | 1              | 0                  | 0                                  | 0                        | 1                           | 0                       | 1                  | 1              | 1                            |
| Ganesh 2009      | Case-control       | Esophageal cancer | 1                             | 1              | 1                  | 1                                  | 0                        | 1                           | 1                       | 0                  | 0              | 0                            |
| Ganesh 2009      | Case-control       | Esophageal cancer | 1                             | 1              | 1                  | 1                                  | 0                        | 1                           | 0                       | 0                  | 0              | 0                            |
| Gupta 2020       | Case-control       | Esophageal cancer | 1                             | 1              | 1                  | 1                                  | 0                        | 1                           | 0                       | 0                  | 0              | 1                            |
| Ihsan 2010       | Case-control       | Esophageal cancer | 1                             | 1              | 1                  | 1                                  | 0                        | 1                           | 0                       | 0                  | 0              | 0                            |
| Jayalekshmi 2021 | Prospective cohort | Esophageal cancer | 0                             | 0              | 1                  | 1                                  | 0                        | 0                           | 0                       | 0                  | 0              | 0                            |
| Joshi 2009       | Case-control       | Esophageal cancer | 1                             | 1              | 1                  | 1                                  | 0                        | 0                           | 0                       | 0                  | 0              | 0                            |
| Jussawalla 1971  | Case-control       | Esophageal cancer | 1                             | 0              | 0                  | 0                                  | 0                        | 0                           | 1                       | 0                  | 0              | 0                            |
| Nandakumar 1996  | Case-control       | Esophageal cancer | 1                             | 1              | 1                  | 1                                  | 0                        | 0                           | 0                       | 0                  | 1              | 0                            |
| Nandakumar 1996  | Case-control       | Esophageal cancer | 1                             | 1              | 0                  | 0                                  | 0                        | 0                           | 0                       | 0                  | 1              | 0                            |
| Nayar 2000       | Case-control       | Esophageal cancer | 1                             | 1              | 0                  | 0                                  | 0                        | 0                           | 1                       | 0                  | 0              | 0                            |
| Notani 1988      | Case-control       | Esophageal cancer | 1                             | 1              | 1                  | 0                                  | 0                        | 0                           | 0                       | 0                  | 0              | 0                            |
| Phukan 2001      | Case-control       | Esophageal cancer | 1                             | 0              | 0                  | 0                                  | 0                        | 1                           | 1                       | 0                  | 1              | 0                            |
| Saikia 2015      | Case-control       | Esophageal cancer | 1                             | 1              | 1                  | 1                                  | 0                        | 1                           | 0                       | 0                  | 0              | 0                            |

| Author                 | Study design       | Health outcome         | Geographically representative | Representative | Maximally adjusted | Adjusted for smoking, age, and sex | Adjusted for age and sex | Chewing tobacco temporality | Chewing tobacco product | Outcome assessment | Sub-population | Aggregate outcome definition |
|------------------------|--------------------|------------------------|-------------------------------|----------------|--------------------|------------------------------------|--------------------------|-----------------------------|-------------------------|--------------------|----------------|------------------------------|
| Sankaran arayanan 1990 | Case-control       | Esophageal cancer      | 1                             | 1              | 1                  | 1                                  | 1                        | 1                           | 1                       | 0                  | 0              | 0                            |
| Sankaran arayanan 1991 | Case-control       | Esophageal cancer      | 1                             | 1              | 1                  | 1                                  | 1                        | 1                           | 1                       | 0                  | 0              | 0                            |
| Sharma 2013            | Case-control       | Esophageal cancer      | 1                             | 1              | 1                  | 1                                  | 1                        | 0                           | 1                       | 0                  | 1              | 0                            |
| Talukdar 2013          | Case-control       | Esophageal cancer      | 1                             | 1              | 0                  | 0                                  | 0                        | 1                           | 0                       | 0                  | 0              | 0                            |
| Wynder 1977            | Case-control       | Esophageal cancer      | 1                             | 1              | 1                  | 1                                  | 0                        | 1                           | 0                       | 0                  | 0              | 0                            |
| Znaor 2003             | Case-control       | Esophageal cancer      | 1                             | 1              | 0                  | 0                                  | 0                        | 1                           | 0                       | 0                  | 0              | 0                            |
| Gupta 2007             | Case-control       | Ischemic heart disease | 1                             | 1              | 1                  | 1                                  | 1                        | 1                           | 0                       | 0                  | 0              | N/A                          |
| Henley 2005            | Prospective cohort | Ischemic heart disease | 0                             | 1              | 0                  | 0                                  | 0                        | 0                           | 0                       | 0                  | 0              | N/A                          |
| Panwar 2011            | Case-control       | Ischemic heart disease | 1                             | 1              | 1                  | 1                                  | 0                        | 1                           | 0                       | 0                  | 0              | N/A                          |
| Rahman 2008            | Case-control       | Ischemic heart disease | 1                             | 1              | 1                  | 1                                  | 0                        | 1                           | 1                       | 0                  | 0              | N/A                          |
| Rahman 2012            | Case-control       | Ischemic heart disease | 1                             | 0              | 0                  | 0                                  | 0                        | 0                           | 1                       | 0                  | 0              | N/A                          |
| Rahman 2012            | Case-control       | Ischemic heart disease | 1                             | 0              | 0                  | 0                                  | 0                        | 1                           | 1                       | 0                  | 0              | N/A                          |
| Ram 2012               | Case-control       | Ischemic heart disease | 1                             | 1              | 1                  | 1                                  | 0                        | 1                           | 0                       | 0                  | 0              | N/A                          |
| Teo 2006               | Case-control       | Ischemic heart disease | 1                             | 1              | 0                  | 0                                  | 0                        | 1                           | 0                       | 0                  | 0              | N/A                          |
| Timberlake 2017        | Prospective cohort | Ischemic heart disease | 0                             | 0              | 1                  | 1                                  | 0                        | 0                           | 0                       | 0                  | 0              | N/A                          |
| Akhtar 2016            | Case-control       | Larynx cancer          | 1                             | 1              | 0                  | 0                                  | 0                        | 1                           | 0                       | 0                  | 0              | 1                            |
| Anuradha 2019          | Case-control       | Larynx cancer          | 1                             | 1              | 1                  | 1                                  | 0                        | 1                           | 0                       | 0                  | 0              | 1                            |



| Author           | Study design       | Health outcome | Geographically representative | Representative | Maximally adjusted | Adjusted for smoking, age, and sex | Adjusted for age and sex | Chewing tobacco temporality | Chewing tobacco product | Outcome assessment | Sub-population | Aggregate outcome definition |
|------------------|--------------------|----------------|-------------------------------|----------------|--------------------|------------------------------------|--------------------------|-----------------------------|-------------------------|--------------------|----------------|------------------------------|
| Basu 2008        | Case-control       | Larynx cancer  | 1                             | 1              | 1                  | 1                                  | 0                        | 0                           | 1                       | 0                  | 0              | 1                            |
| Chang 2020       | Case-control       | Larynx cancer  | 1                             | 1              | 0                  | 0                                  | 0                        | 1                           | 1                       | 0                  | 0              | 1                            |
| Choudhury 2015   | Case-control       | Larynx cancer  | 1                             | 1              | 1                  | 1                                  | 1                        | 1                           | 1                       | 0                  | 0              | 1                            |
| Gajalakshmi 2012 | Case-control       | Larynx cancer  | 1                             | 1              | 0                  | 0                                  | 0                        | 1                           | 0                       | 1                  | 1              | 1                            |
| Gholap 2023      | Case-control       | Larynx cancer  | 0                             | 1              | 1                  | 1                                  | 0                        | 1                           | 1                       | 0                  | 0              | 0                            |
| Gupta 2020       | Case-control       | Larynx cancer  | 1                             | 1              | 1                  | 1                                  | 0                        | 1                           | 0                       | 0                  | 0              | 1                            |
| Jayalekshmi 2013 | Prospective cohort | Larynx cancer  | 1                             | 0              | 0                  | 0                                  | 0                        | 0                           | 0                       | 0                  | 0              | 0                            |
| Jussawalla 1971  | Case-control       | Larynx cancer  | 1                             | 0              | 0                  | 0                                  | 0                        | 0                           | 1                       | 0                  | 0              | 0                            |
| Kapil 2005       | Case-control       | Larynx cancer  | 1                             | 1              | 1                  | 1                                  | 0                        | 0                           | 0                       | 0                  | 0              | 0                            |
| Kapil 2005       | Case-control       | Larynx cancer  | 1                             | 1              | 1                  | 1                                  | 0                        | 0                           | 1                       | 0                  | 0              | 0                            |
| Notani 1988      | Case-control       | Larynx cancer  | 1                             | 1              | 1                  | 0                                  | 0                        | 0                           | 0                       | 0                  | 0              | 0                            |
| Rao 1999         | Case-control       | Larynx cancer  | 1                             | 1              | 1                  | 1                                  | 1                        | 1                           | 0                       | 0                  | 0              | 0                            |
| Ruwali 2009      | Case-control       | Larynx cancer  | 1                             | 1              | 1                  | 1                                  | 1                        | 1                           | 0                       | 0                  | 0              | 1                            |
| Ruwali 2011      | Case-control       | Larynx cancer  | 1                             | 1              | 0                  | 0                                  | 0                        | 1                           | 0                       | 0                  | 0              | 1                            |
| Sam 2007         | Case-control       | Larynx cancer  | 1                             | 1              | 1                  | 1                                  | 0                        | 1                           | 0                       | 0                  | 0              | 1                            |
| Sam 2010         | Case-control       | Larynx cancer  | 1                             | 1              | 1                  | 0                                  | 0                        | 1                           | 0                       | 0                  | 0              | 1                            |
| Sapkota 2007     | Case-control       | Larynx cancer  | 1                             | 1              | 0                  | 0                                  | 0                        | 1                           | 0                       | 0                  | 1              | 0                            |
| Singh 2008       | Case-control       | Larynx cancer  | 1                             | 1              | 1                  | 0                                  | 0                        | 1                           | 0                       | 0                  | 1              | 1                            |
| Singh 2009       | Case-control       | Larynx cancer  | 1                             | 1              | 1                  | 1                                  | 1                        | 1                           | 0                       | 0                  | 0              | 1                            |
| Soya 2007        | Case-control       | Larynx cancer  | 1                             | 1              | 1                  | 1                                  | 0                        | 1                           | 0                       | 0                  | 0              | 1                            |

| Author            | Study design | Health outcome             | Geographically representative | Representative | Maximally adjusted | Adjusted for smoking, age, and sex | Adjusted for age and sex | Chewing tobacco temporality | Chewing tobacco product | Outcome assessment | Sub-population | Aggregate outcome definition |
|-------------------|--------------|----------------------------|-------------------------------|----------------|--------------------|------------------------------------|--------------------------|-----------------------------|-------------------------|--------------------|----------------|------------------------------|
| Wynder 1977       | Case-control | Larynx cancer              | 1                             | 1              | 1                  | 1                                  | 0                        | 1                           | 0                       | 0                  | 0              | 0                            |
| Wyss 2016         | Case-control | Larynx cancer              | 1                             | 1              | 0                  | 0                                  | 0                        | 1                           | 0                       | 0                  | 1              | 0                            |
| Yadav 2008        | Case-control | Larynx cancer              | 1                             | 1              | 0                  | 0                                  | 0                        | 1                           | 0                       | 0                  | 1              | 1                            |
| Akhtar 2016       | Case-control | Lip and oral cavity cancer | 1                             | 1              | 0                  | 0                                  | 0                        | 1                           | 0                       | 0                  | 0              | 1                            |
| Akram 2013        | Case-control | Lip and oral cavity cancer | 1                             | 1              | 1                  | 1                                  | 0                        | 0                           | 0                       | 0                  | 0              | 0                            |
| Amtha 2014        | Case-control | Lip and oral cavity cancer | 1                             | 0              | 1                  | 1                                  | 1                        | 1                           | 1                       | 0                  | 0              | 0                            |
| Anantharaman 2007 | Case-control | Lip and oral cavity cancer | 1                             | 1              | 1                  | 0                                  | 0                        | 1                           | 0                       | 0                  | 1              | 0                            |
| Anantharaman 2014 | Case-control | Lip and oral cavity cancer | 1                             | 1              | 0                  | 0                                  | 0                        | 1                           | 0                       | 0                  | 0              | 1                            |
| Anuradha 2019     | Case-control | Lip and oral cavity cancer | 1                             | 1              | 1                  | 1                                  | 0                        | 1                           | 0                       | 0                  | 0              | 1                            |
| Arain 2015        | Case-control | Lip and oral cavity cancer | 1                             | 1              | 1                  | 1                                  | 1                        | 0                           | 1                       | 0                  | 1              | 0                            |
| Awan 2016         | Case-control | Lip and oral cavity cancer | 1                             | 1              | 1                  | 1                                  | 1                        | 1                           | 1                       | 0                  | 0              | 0                            |
| Awan 2016         | Case-control | Lip and oral cavity cancer | 1                             | 1              | 1                  | 1                                  | 1                        | 1                           | 0                       | 0                  | 0              | 0                            |
| Balaram 2002      | Case-cohort  | Lip and oral cavity cancer | 1                             | 1              | 0                  | 0                                  | 0                        | 1                           | 1                       | 0                  | 1              | 0                            |

| Author           | Study design | Health outcome             | Geographically representative | Representative | Maximally adjusted | Adjusted for smoking, age, and sex | Adjusted for age and sex | Chewing tobacco temporality | Chewing tobacco product | Outcome assessment | Sub-population | Aggregate outcome definition |
|------------------|--------------|----------------------------|-------------------------------|----------------|--------------------|------------------------------------|--------------------------|-----------------------------|-------------------------|--------------------|----------------|------------------------------|
| Balaram 2002     | Case-cohort  | Lip and oral cavity cancer | 1                             | 1              | 1                  | 1                                  | 0                        | 1                           | 1                       | 0                  | 1              | 0                            |
| Basu 2008        | Case-control | Lip and oral cavity cancer | 1                             | 1              | 1                  | 1                                  | 0                        | 0                           | 1                       | 0                  | 0              | 1                            |
| Buch 2002        | Case-control | Lip and oral cavity cancer | 1                             | 1              | 1                  | 1                                  | 1                        | 0                           | 1                       | 0                  | 0              | 0                            |
| Bundgaard 1995   | Case-control | Lip and oral cavity cancer | 1                             | 0              | 1                  | 1                                  | 0                        | 1                           | 0                       | 0                  | 0              | 0                            |
| Chang 2020       | Case-control | Lip and oral cavity cancer | 1                             | 1              | 0                  | 0                                  | 0                        | 1                           | 1                       | 0                  | 0              | 1                            |
| Choudhury 2015   | Case-control | Lip and oral cavity cancer | 1                             | 1              | 1                  | 1                                  | 1                        | 1                           | 1                       | 0                  | 0              | 1                            |
| Dholam 2016      | Case-control | Lip and oral cavity cancer | 1                             | 1              | 0                  | 0                                  | 0                        | 1                           | 0                       | 0                  | 1              | 1                            |
| Dikshit 2000     | Case-control | Lip and oral cavity cancer | 1                             | 0              | 1                  | 0                                  | 0                        | 1                           | 0                       | 0                  | 0              | 0                            |
| Edirisinghe 2022 | Case-control | Lip and oral cavity cancer | 0                             | 1              | 1                  | 1                                  | 0                        | 0                           | 1                       | 0                  | 0              | 0                            |
| Gajalakshmi 2012 | Case-control | Lip and oral cavity cancer | 1                             | 1              | 0                  | 0                                  | 0                        | 1                           | 0                       | 1                  | 1              | 1                            |
| Gholap 2023      | Case-control | Lip and oral cavity cancer | 0                             | 1              | 1                  | 1                                  | 0                        | 1                           | 1                       | 0                  | 0              | 0                            |
| Goud 1990        | Case-control | Lip and oral cavity cancer | 1                             | 1              | 1                  | 1                                  | 0                        | 0                           | 0                       | 0                  | 0              | 0                            |

| Author           | Study design       | Health outcome             | Geographically representative | Representative | Maximally adjusted | Adjusted for smoking, age, and sex | Adjusted for age and sex | Chewing tobacco temporality | Chewing tobacco product | Outcome assessment | Sub-population | Aggregate outcome definition |
|------------------|--------------------|----------------------------|-------------------------------|----------------|--------------------|------------------------------------|--------------------------|-----------------------------|-------------------------|--------------------|----------------|------------------------------|
| Gupta 2014       | Case-control       | Lip and oral cavity cancer | 1                             | 1              | 1                  | 1                                  | 1                        | 1                           | 0                       | 0                  | 0              | 0                            |
| Gupta 2017       | Case-control       | Lip and oral cavity cancer | 1                             | 0              | 0                  | 0                                  | 0                        | 1                           | 0                       | 0                  | 0              | 0                            |
| Gupta 2020       | Case-control       | Lip and oral cavity cancer | 1                             | 1              | 1                  | 1                                  | 0                        | 1                           | 0                       | 0                  | 0              | 1                            |
| Herrero 2003     | Case-control       | Lip and oral cavity cancer | 1                             | 1              | 1                  | 1                                  | 0                        | 1                           | 1                       | 0                  | 0              | 0                            |
| Ihsan 2011       | Case-control       | Lip and oral cavity cancer | 1                             | 1              | 0                  | 0                                  | 0                        | 1                           | 0                       | 0                  | 0              | 0                            |
| Imam 2021        | Case-control       | Lip and oral cavity cancer | 1                             | 1              | 1                  | 1                                  | 1                        | 1                           | 1                       | 0                  | 0              | 0                            |
| Jafarey 1977     | Case-control       | Lip and oral cavity cancer | 1                             | 0              | 0                  | 0                                  | 0                        | 0                           | 0                       | 0                  | 1              | 1                            |
| Jayalekshmi 2009 | Prospective cohort | Lip and oral cavity cancer | 0                             | 0              | 1                  | 1                                  | 0                        | 0                           | 0                       | 0                  | 0              | 0                            |
| Jayalekshmi 2011 | Prospective cohort | Lip and oral cavity cancer | 0                             | 0              | 0                  | 0                                  | 0                        | 0                           | 0                       | 0                  | 0              | 0                            |
| Jussawalla 1971  | Case-control       | Lip and oral cavity cancer | 1                             | 0              | 0                  | 0                                  | 0                        | 0                           | 1                       | 0                  | 0              | 0                            |
| Kabat 1994       | Case-control       | Lip and oral cavity cancer | 1                             | 1              | 0                  | 0                                  | 0                        | 0                           | 0                       | 0                  | 0              | 1                            |
| Kazi 2010        | Case-control       | Lip and oral cavity cancer | 1                             | 1              | 1                  | 1                                  | 1                        | 1                           | 0                       | 0                  | 0              | 0                            |

| Author           | Study design | Health outcome             | Geographically representative | Representative | Maximally adjusted | Adjusted for smoking, age, and sex | Adjusted for age and sex | Chewing tobacco temporality | Chewing tobacco product | Outcome assessment | Sub-population | Aggregate outcome definition |
|------------------|--------------|----------------------------|-------------------------------|----------------|--------------------|------------------------------------|--------------------------|-----------------------------|-------------------------|--------------------|----------------|------------------------------|
| Kietthubtew 2001 | Case-control | Lip and oral cavity cancer | 1                             | 1              | 0                  | 0                                  | 0                        | 0                           | 1                       | 0                  | 0              | 0                            |
| Krishna 2014     | Case-control | Lip and oral cavity cancer | 1                             | 1              | 0                  | 0                                  | 0                        | 1                           | 0                       | 0                  | 0              | 0                            |
| Krishnarao 2015  | Case-control | Lip and oral cavity cancer | 1                             | 1              | 1                  | 1                                  | 1                        | 1                           | 1                       | 0                  | 0              | 1                            |
| Lakhanpal 2014   | Case-control | Lip and oral cavity cancer | 1                             | 1              | 1                  | 1                                  | 1                        | 1                           | 0                       | 0                  | 0              | 0                            |
| Lohe 2010        | Case-control | Lip and oral cavity cancer | 1                             | 1              | 1                  | 1                                  | 0                        | 0                           | 1                       | 0                  | 0              | 0                            |
| Lohe 2010        | Case-control | Lip and oral cavity cancer | 1                             | 1              | 1                  | 1                                  | 0                        | 0                           | 0                       | 0                  | 0              | 0                            |
| Madani 2010      | Case-control | Lip and oral cavity cancer | 1                             | 1              | 0                  | 0                                  | 0                        | 1                           | 1                       | 0                  | 0              | 0                            |
| Mahapatra 2015   | Case-control | Lip and oral cavity cancer | 1                             | 1              | 0                  | 0                                  | 0                        | 1                           | 1                       | 0                  | 0              | 0                            |
| Mahapatra 2015   | Case-control | Lip and oral cavity cancer | 1                             | 1              | 0                  | 0                                  | 0                        | 1                           | 0                       | 0                  | 0              | 0                            |
| Mashberg 1993    | Case-control | Lip and oral cavity cancer | 1                             | 1              | 0                  | 0                                  | 0                        | 1                           | 0                       | 0                  | 0              | 1                            |
| Mekala 2020      | Case-control | Lip and oral cavity cancer | 1                             | 1              | 1                  | 1                                  | 0                        | 1                           | 0                       | 0                  | 0              | 0                            |
| Merchant 2000    | Case-control | Lip and oral cavity cancer | 1                             | 1              | 0                  | 0                                  | 0                        | 1                           | 1                       | 0                  | 0              | 0                            |

| Author          | Study design        | Health outcome             | Geographically representative | Representative | Maximally adjusted | Adjusted for smoking, age, and sex | Adjusted for age and sex | Chewing tobacco temporality | Chewing tobacco product | Outcome assessment | Sub-population | Aggregate outcome definition |
|-----------------|---------------------|----------------------------|-------------------------------|----------------|--------------------|------------------------------------|--------------------------|-----------------------------|-------------------------|--------------------|----------------|------------------------------|
| Merchant 2015   | Case-control        | Lip and oral cavity cancer | 1                             | 1              | 0                  | 0                                  | 0                        | 1                           | 1                       | 0                  | 0              | 0                            |
| Muwonge 2008    | Nested case-control | Lip and oral cavity cancer | 1                             | 0              | 0                  | 0                                  | 0                        | 0                           | 0                       | 0                  | 0              | 0                            |
| Nandakumar 1990 | Case-control        | Lip and oral cavity cancer | 1                             | 1              | 1                  | 1                                  | 0                        | 1                           | 1                       | 0                  | 0              | 0                            |
| Ngelange I 2009 | Case-control        | Lip and oral cavity cancer | 1                             | 1              | 1                  | 1                                  | 1                        | 0                           | 0                       | 0                  | 0              | 0                            |
| Notani 1988     | Case-control        | Lip and oral cavity cancer | 1                             | 1              | 1                  | 0                                  | 0                        | 0                           | 0                       | 0                  | 0              | 0                            |
| Radoi 2013      | Case-control        | Lip and oral cavity cancer | 1                             | 0              | 0                  | 0                                  | 0                        | 1                           | 0                       | 0                  | 0              | 0                            |
| Rao 1994        | Case-control        | Lip and oral cavity cancer | 1                             | 1              | 1                  | 1                                  | 1                        | 1                           | 0                       | 0                  | 0              | 0                            |
| Rao 1998        | Case-control        | Lip and oral cavity cancer | 1                             | 1              | 0                  | 0                                  | 0                        | 1                           | 0                       | 0                  | 0              | 0                            |
| Ray 2013        | Case-control        | Lip and oral cavity cancer | 1                             | 1              | 1                  | 1                                  | 1                        | 1                           | 0                       | 0                  | 0              | 0                            |
| Ruwali 2009     | Case-control        | Lip and oral cavity cancer | 1                             | 1              | 1                  | 1                                  | 1                        | 1                           | 0                       | 0                  | 0              | 1                            |
| Ruwali 2011     | Case-control        | Lip and oral cavity cancer | 1                             | 1              | 0                  | 0                                  | 0                        | 1                           | 0                       | 0                  | 0              | 1                            |
| Sam 2007        | Case-control        | Lip and oral cavity cancer | 1                             | 1              | 1                  | 1                                  | 0                        | 1                           | 0                       | 0                  | 0              | 1                            |

| Author                 | Study design | Health outcome             | Geographically representative | Representative | Maximally adjusted | Adjusted for smoking, age, and sex | Adjusted for age and sex | Chewing tobacco temporality | Chewing tobacco product | Outcome assessment | Sub-population | Aggregate outcome definition |
|------------------------|--------------|----------------------------|-------------------------------|----------------|--------------------|------------------------------------|--------------------------|-----------------------------|-------------------------|--------------------|----------------|------------------------------|
| Sam 2010               | Case-control | Lip and oral cavity cancer | 1                             | 1              | 1                  | 0                                  | 0                        | 1                           | 0                       | 0                  | 0              | 1                            |
| Sankaran arayanan 1989 | Case-control | Lip and oral cavity cancer | 1                             | 1              | 1                  | 1                                  | 0                        | 1                           | 1                       | 0                  | 0              | 0                            |
| Sankaran arayanan 1989 | Case-control | Lip and oral cavity cancer | 1                             | 1              | 1                  | 1                                  | 1                        | 1                           | 1                       | 0                  | 0              | 0                            |
| Sankaran arayanan 1990 | Case-control | Lip and oral cavity cancer | 1                             | 1              | 1                  | 1                                  | 1                        | 1                           | 1                       | 0                  | 0              | 0                            |
| Sharma 2019            | Case-control | Lip and oral cavity cancer | 1                             | 1              | 1                  | 1                                  | 1                        | 0                           | 0                       | 0                  | 0              | 0                            |
| Sikdar 2004            | Case-control | Lip and oral cavity cancer | 1                             | 1              | 1                  | 1                                  | 1                        | 1                           | 0                       | 0                  | 0              | 0                            |
| Singh 2008             | Case-control | Lip and oral cavity cancer | 1                             | 1              | 1                  | 0                                  | 0                        | 1                           | 0                       | 0                  | 1              | 1                            |
| Singh 2009             | Case-control | Lip and oral cavity cancer | 1                             | 1              | 1                  | 1                                  | 1                        | 1                           | 0                       | 0                  | 0              | 1                            |
| Singh 2014             | Case-control | Lip and oral cavity cancer | 1                             | 1              | 1                  | 1                                  | 1                        | 1                           | 0                       | 0                  | 1              | 0                            |
| Soya 2007              | Case-control | Lip and oral cavity cancer | 1                             | 1              | 1                  | 1                                  | 0                        | 1                           | 0                       | 0                  | 0              | 1                            |
| Subapriya 2007         | Case-control | Lip and oral cavity cancer | 1                             | 1              | 1                  | 1                                  | 0                        | 1                           | 0                       | 0                  | 1              | 0                            |
| Subapriya 2007         | Case-control | Lip and oral cavity cancer | 1                             | 1              | 1                  | 1                                  | 0                        | 1                           | 1                       | 0                  | 1              | 0                            |

| Author           | Study design | Health outcome             | Geographically representative | Representative | Maximally adjusted | Adjusted for smoking, age, and sex | Adjusted for age and sex | Chewing tobacco temporality | Chewing tobacco product | Outcome assessment | Sub-population | Aggregate outcome definition |
|------------------|--------------|----------------------------|-------------------------------|----------------|--------------------|------------------------------------|--------------------------|-----------------------------|-------------------------|--------------------|----------------|------------------------------|
| Wynder 1977      | Case-control | Lip and oral cavity cancer | 1                             | 1              | 1                  | 1                                  | 0                        | 1                           | 0                       | 0                  | 0              | 0                            |
| Wyss 2016        | Case-control | Lip and oral cavity cancer | 1                             | 1              | 0                  | 0                                  | 0                        | 1                           | 0                       | 0                  | 0              | 1                            |
| Wyss 2016        | Case-control | Lip and oral cavity cancer | 1                             | 1              | 0                  | 0                                  | 0                        | 1                           | 0                       | 0                  | 1              | 0                            |
| Wyss 2016        | Case-control | Lip and oral cavity cancer | 1                             | 1              | 0                  | 0                                  | 0                        | 1                           | 0                       | 0                  | 1              | 1                            |
| Yadav 2008       | Case-control | Lip and oral cavity cancer | 1                             | 1              | 0                  | 0                                  | 0                        | 1                           | 0                       | 0                  | 1              | 1                            |
| Yadav 2010       | Case-control | Lip and oral cavity cancer | 1                             | 1              | 0                  | 0                                  | 0                        | 1                           | 0                       | 0                  | 0              | 0                            |
| Znaor 2003       | Case-control | Lip and oral cavity cancer | 1                             | 1              | 0                  | 0                                  | 0                        | 1                           | 0                       | 0                  | 0              | 0                            |
| Akhtar 2016      | Case-control | Nasopharynx cancer         | 1                             | 1              | 0                  | 0                                  | 0                        | 1                           | 0                       | 0                  | 0              | 1                            |
| Anuradha 2019    | Case-control | Nasopharynx cancer         | 1                             | 1              | 1                  | 1                                  | 0                        | 1                           | 0                       | 0                  | 0              | 1                            |
| Arain 2015       | Case-control | Nasopharynx cancer         | 1                             | 1              | 1                  | 1                                  | 1                        | 0                           | 1                       | 0                  | 1              | 1                            |
| Chelleng 2000    | Case-control | Nasopharynx cancer         | 1                             | 1              | 1                  | 1                                  | 0                        | 0                           | 0                       | 0                  | 0              | 0                            |
| Choudhury 2015   | Case-control | Nasopharynx cancer         | 1                             | 1              | 1                  | 1                                  | 1                        | 1                           | 1                       | 0                  | 0              | 1                            |
| Gajalakshmi 2012 | Case-control | Nasopharynx cancer         | 1                             | 1              | 0                  | 0                                  | 0                        | 1                           | 0                       | 1                  | 1              | 1                            |
| Gupta 2020       | Case-control | Nasopharynx cancer         | 1                             | 1              | 1                  | 1                                  | 0                        | 1                           | 0                       | 0                  | 0              | 1                            |



| Author            | Study design | Health outcome       | Geographically representative | Representative | Maximally adjusted | Adjusted for smoking, age, and sex | Adjusted for age and sex | Chewing tobacco temporality | Chewing tobacco product | Outcome assessment | Sub-population | Aggregate outcome definition |
|-------------------|--------------|----------------------|-------------------------------|----------------|--------------------|------------------------------------|--------------------------|-----------------------------|-------------------------|--------------------|----------------|------------------------------|
| Jussawalla 1971   | Case-control | Nasopharynx cancer   | 1                             | 0              | 0                  | 0                                  | 0                        | 0                           | 1                       | 0                  | 0              | 0                            |
| Notani 1988       | Case-control | Nasopharynx cancer   | 1                             | 1              | 1                  | 0                                  | 0                        | 0                           | 0                       | 0                  | 0              | 1                            |
| Ruwali 2011       | Case-control | Nasopharynx cancer   | 1                             | 1              | 0                  | 0                                  | 0                        | 1                           | 0                       | 0                  | 0              | 1                            |
| Sam 2007          | Case-control | Nasopharynx cancer   | 1                             | 1              | 1                  | 1                                  | 0                        | 1                           | 0                       | 0                  | 0              | 1                            |
| Sam 2010          | Case-control | Nasopharynx cancer   | 1                             | 1              | 1                  | 0                                  | 0                        | 1                           | 0                       | 0                  | 0              | 1                            |
| Singh 2008        | Case-control | Nasopharynx cancer   | 1                             | 1              | 1                  | 0                                  | 0                        | 1                           | 0                       | 0                  | 1              | 1                            |
| Singh 2009        | Case-control | Nasopharynx cancer   | 1                             | 1              | 1                  | 1                                  | 1                        | 1                           | 0                       | 0                  | 0              | 1                            |
| Soya 2007         | Case-control | Nasopharynx cancer   | 1                             | 1              | 1                  | 1                                  | 0                        | 1                           | 0                       | 0                  | 0              | 1                            |
| Wyss 2016         | Case-control | Nasopharynx cancer   | 1                             | 1              | 0                  | 0                                  | 0                        | 1                           | 0                       | 0                  | 0              | 1                            |
| Wyss 2016         | Case-control | Nasopharynx cancer   | 1                             | 1              | 0                  | 0                                  | 0                        | 1                           | 0                       | 0                  | 1              | 1                            |
| Yadav 2008        | Case-control | Nasopharynx cancer   | 1                             | 1              | 0                  | 0                                  | 0                        | 1                           | 0                       | 0                  | 1              | 1                            |
| Akhtar 2016       | Case-control | Other pharynx cancer | 1                             | 1              | 0                  | 0                                  | 0                        | 1                           | 0                       | 0                  | 0              | 1                            |
| Anantharaman 2014 | Case-control | Other pharynx cancer | 1                             | 1              | 0                  | 0                                  | 0                        | 1                           | 0                       | 0                  | 0              | 1                            |
| Anuradha 2019     | Case-control | Other pharynx cancer | 1                             | 1              | 1                  | 1                                  | 0                        | 1                           | 0                       | 0                  | 0              | 1                            |
| Arain 2015        | Case-control | Other pharynx cancer | 1                             | 1              | 1                  | 1                                  | 1                        | 0                           | 1                       | 0                  | 1              | 1                            |

| Author            | Study design       | Health outcome       | Geographically representative | Representative | Maximally adjusted | Adjusted for smoking, age, and sex | Adjusted for age and sex | Chewing tobacco temporality | Chewing tobacco product | Outcome assessment | Sub-population | Aggregate outcome definition |
|-------------------|--------------------|----------------------|-------------------------------|----------------|--------------------|------------------------------------|--------------------------|-----------------------------|-------------------------|--------------------|----------------|------------------------------|
| Chang 2020        | Case-control       | Other pharynx cancer | 1                             | 1              | 0                  | 0                                  | 0                        | 1                           | 1                       | 0                  | 0              | 1                            |
| Choudhury 2015    | Case-control       | Other pharynx cancer | 1                             | 1              | 1                  | 1                                  | 1                        | 1                           | 1                       | 0                  | 0              | 1                            |
| Dholam 2016       | Case-control       | Other pharynx cancer | 1                             | 1              | 0                  | 0                                  | 0                        | 1                           | 0                       | 0                  | 1              | 1                            |
| Dikshit 2000      | Case-control       | Other pharynx cancer | 1                             | 0              | 1                  | 0                                  | 0                        | 1                           | 0                       | 0                  | 0              | 0                            |
| Gajalaks hmi 2012 | Case-control       | Other pharynx cancer | 1                             | 1              | 0                  | 0                                  | 0                        | 1                           | 0                       | 1                  | 1              | 1                            |
| Gupta 2020        | Case-control       | Other pharynx cancer | 1                             | 1              | 1                  | 1                                  | 0                        | 1                           | 0                       | 0                  | 0              | 1                            |
| Herrero 2003      | Case-control       | Other pharynx cancer | 1                             | 1              | 1                  | 1                                  | 0                        | 1                           | 1                       | 0                  | 0              | 0                            |
| Jafarey 1977      | Case-control       | Other pharynx cancer | 1                             | 0              | 0                  | 0                                  | 0                        | 0                           | 0                       | 0                  | 1              | 1                            |
| Jayaleksh mi 2013 | Prospective cohort | Other pharynx cancer | 1                             | 0              | 0                  | 0                                  | 0                        | 0                           | 0                       | 0                  | 0              | 0                            |
| Jussawalla 1971   | Case-control       | Other pharynx cancer | 1                             | 0              | 0                  | 0                                  | 0                        | 0                           | 1                       | 0                  | 0              | 0                            |
| Kabat 1994        | Case-control       | Other pharynx cancer | 1                             | 1              | 0                  | 0                                  | 0                        | 0                           | 0                       | 0                  | 0              | 1                            |
| Krishnara o 2015  | Case-control       | Other pharynx cancer | 1                             | 1              | 1                  | 1                                  | 1                        | 1                           | 1                       | 0                  | 0              | 1                            |
| Mashberg 1993     | Case-control       | Other pharynx cancer | 1                             | 1              | 0                  | 0                                  | 0                        | 1                           | 0                       | 0                  | 0              | 1                            |
| Notani 1988       | Case-control       | Other pharynx cancer | 1                             | 1              | 1                  | 0                                  | 0                        | 0                           | 0                       | 0                  | 0              | 1                            |
| Rao 1999          | Case-control       | Other pharynx cancer | 1                             | 1              | 1                  | 1                                  | 1                        | 1                           | 0                       | 0                  | 0              | 0                            |

| Author          | Study design | Health outcome       | Geographically representative | Representative | Maximally adjusted | Adjusted for smoking, age, and sex | Adjusted for age and sex | Chewing tobacco temporality | Chewing tobacco product | Outcome assessment | Sub-population | Aggregate outcome definition |
|-----------------|--------------|----------------------|-------------------------------|----------------|--------------------|------------------------------------|--------------------------|-----------------------------|-------------------------|--------------------|----------------|------------------------------|
| Ruwali 2009     | Case-control | Other pharynx cancer | 1                             | 1              | 1                  | 1                                  | 1                        | 1                           | 0                       | 0                  | 0              | 1                            |
| Ruwali 2011     | Case-control | Other pharynx cancer | 1                             | 1              | 0                  | 0                                  | 0                        | 1                           | 0                       | 0                  | 0              | 1                            |
| Sam 2007        | Case-control | Other pharynx cancer | 1                             | 1              | 1                  | 1                                  | 0                        | 1                           | 0                       | 0                  | 0              | 1                            |
| Sam 2010        | Case-control | Other pharynx cancer | 1                             | 1              | 1                  | 0                                  | 0                        | 1                           | 0                       | 0                  | 0              | 1                            |
| Sapkota 2007    | Case-control | Other pharynx cancer | 1                             | 1              | 0                  | 0                                  | 0                        | 1                           | 0                       | 0                  | 1              | 0                            |
| Singh 2008      | Case-control | Other pharynx cancer | 1                             | 1              | 1                  | 0                                  | 0                        | 1                           | 0                       | 0                  | 1              | 1                            |
| Singh 2009      | Case-control | Other pharynx cancer | 1                             | 1              | 1                  | 1                                  | 1                        | 1                           | 0                       | 0                  | 0              | 1                            |
| Soya 2007       | Case-control | Other pharynx cancer | 1                             | 1              | 1                  | 1                                  | 0                        | 1                           | 0                       | 0                  | 0              | 1                            |
| Wasnik 1998     | Case-control | Other pharynx cancer | 1                             | 1              | 0                  | 0                                  | 0                        | 1                           | 0                       | 0                  | 0              | 0                            |
| Wyss 2016       | Case-control | Other pharynx cancer | 1                             | 1              | 0                  | 0                                  | 0                        | 1                           | 0                       | 0                  | 0              | 1                            |
| Wyss 2016       | Case-control | Other pharynx cancer | 1                             | 1              | 0                  | 0                                  | 0                        | 1                           | 0                       | 0                  | 1              | 0                            |
| Wyss 2016       | Case-control | Other pharynx cancer | 1                             | 1              | 0                  | 0                                  | 0                        | 1                           | 0                       | 0                  | 1              | 1                            |
| Yadav 2008      | Case-control | Other pharynx cancer | 1                             | 1              | 0                  | 0                                  | 0                        | 1                           | 0                       | 0                  | 1              | 1                            |
| Znaor 2003      | Case-control | Other pharynx cancer | 1                             | 1              | 1                  | 1                                  | 1                        | 1                           | 0                       | 0                  | 0              | 0                            |
| Agashe 2013     | Case-control | Stroke               | 1                             | 1              | 1                  | 1                                  | 0                        | 0                           | 1                       | 0                  | 0              | N/A                          |
| Gajalakhmi 2015 | Case-control | Stroke               | 1                             | 1              | 0                  | 0                                  | 0                        | 1                           | 0                       | 0                  | 0              | N/A                          |

| Author      | Study design | Health outcome | Geographically representative | Representative | Maximally adjusted | Adjusted for smoking, age, and sex | Adjusted for age and sex | Chewing tobacco temporality | Chewing tobacco product | Outcome assessment | Sub-population | Aggregate outcome definition |
|-------------|--------------|----------------|-------------------------------|----------------|--------------------|------------------------------------|--------------------------|-----------------------------|-------------------------|--------------------|----------------|------------------------------|
| Mateen 2012 | Case-control | Stroke         | 1                             | 1              | 1                  | 1                                  | 0                        | 1                           | 1                       | 0                  | 0              | N/A                          |

Bias covariates were eligible for testing in a model if there were two or more observations for each coded value of the covariate. If two or more bias covariates had the same values across all the observations, only one would be kept as eligible for testing with the covariates that align with GRADE criteria for bias being prioritized over the ones specific to chewing tobacco.

**Table S10: Bias Covariates eligible for testing for each health outcome**

| Health outcome             | Eligible bias covariates                                                                                                                                                                                                                                | Selected bias covariates                               |
|----------------------------|---------------------------------------------------------------------------------------------------------------------------------------------------------------------------------------------------------------------------------------------------------|--------------------------------------------------------|
| Stroke                     | Chewing tobacco temporality                                                                                                                                                                                                                             | None                                                   |
| Lip and oral cavity cancer | Aggregate outcome definition; Outcome assessment; Geographically representative; Representative; Maximally adjusted; Adjusted for smoking, age, and sex; Adjusted for age and sex; Sub-population; Chewing tobacco temporality; Chewing tobacco product | Chewing tobacco product; Sub-population                |
| Esophageal cancer          | Aggregate outcome definition; Outcome assessment; Representative; Maximally adjusted; Adjusted for smoking, age, and sex; Adjusted for age and sex; Sub-population; Chewing tobacco temporality; Chewing tobacco product                                | Maximally adjusted; Adjusted for smoking, age, and sex |
| Larynx cancer              | Aggregate outcome definition; Outcome assessment; Geographically representative; Representative; Maximally adjusted; Adjusted for smoking, age, and sex; Adjusted for age and sex; Sub-population; Chewing tobacco temporality; Chewing tobacco product | Aggregate outcome definition; Adjusted for age and sex |
| Nasopharynx cancer         | Aggregate outcome definition; Outcome assessment; Maximally adjusted; Adjusted for smoking, age, and sex; Adjusted for age and sex; Sub-population; Chewing                                                                                             | Maximally adjusted; Adjusted for age and sex           |

|                        |                                                                                                                                                                                                                          |                                                        |
|------------------------|--------------------------------------------------------------------------------------------------------------------------------------------------------------------------------------------------------------------------|--------------------------------------------------------|
|                        | tobacco temporality; Chewing tobacco product                                                                                                                                                                             |                                                        |
| Other pharynx cancer   | Aggregate outcome definition; Outcome assessment; Representative; Maximally adjusted; Adjusted for smoking, age, and sex; Adjusted for age and sex; Sub-population; Chewing tobacco temporality; Chewing tobacco product | Aggregate outcome definition; Adjusted for age and sex |
| Ischemic heart disease | Geographically representative; Representative; Maximally adjusted; Adjusted for smoking, age, and sex; Chewing tobacco temporality; Chewing tobacco product                                                              | None                                                   |

*Section 3.4: Detailed methods for estimating the relative risk of 8 health outcomes*

The methods used to estimate the relative risk within the Burden of Proof framework have been described in detail elsewhere<sup>4-9</sup>. Here, we present some specific details that are particularly relevant to chewing tobacco relative risk estimations that were not covered in as much detail in the manuscript due to a lack of available space.

Within GBD, chewing tobacco exposure is estimated as a dichotomous risk factor in which individuals are either exposed (use chewing tobacco) or are not (do not use chewing tobacco)<sup>2</sup>. As a result, all of our risk-outcome pairs associated with chewing tobacco were evaluated as binary risk-outcome associations to produce compatible results for future incorporation in GBD. Furthermore, dose-response data for chewing tobacco is extremely limited, which would hinder our ability to create accurate dose-response curves if it were treated as a continuous risk factor. Similarly, we did not estimate sex-specific relative risks or any other disaggregated measures of risk because these estimates will be broadly applied within the GBD framework and because of the limited data available. Furthermore, it is unlikely the mechanism through which chewing tobacco influences an individual’s risk of a given health outcome is impacted by their sex or other such characteristics, so a global relative risk was deemed appropriate given these constraints.

Since the meta-regression tool draws upon the uncertainty surrounding each observation to inform its estimate, we had to address the fact that three eligible observations for our head and neck cancer models did not report an associated uncertainty. We filled in these missing values by using the 98<sup>th</sup> percentile log-space standard error reported in the other head and neck cancer studies. This approach reflects a conservative estimation of uncertainty for these three data points and is not expected to influence our model results substantially.

For very data-sparse risk-outcome pairs, like chewing tobacco and stroke, the Burden of Proof approach applies the Fisher Scoring correction to gamma, which uses a quantile of our between-study heterogeneity that is sensitive to study characteristics and number of studies to address the potential underestimation of gamma in these conditions.

**Table S11: MR-BRT model specifications by risk-outcome pair**

| Health outcome             | Type of risk | Number of draws | Percent trimmed | Pre-selected covariates |
|----------------------------|--------------|-----------------|-----------------|-------------------------|
| Stroke                     | Dichotomous  | 1000            | 0%              | None                    |
| Lip and oral cavity cancer | Dichotomous  | 1000            | 10%             | None                    |
| Esophageal cancer          | Dichotomous  | 1000            | 10%             | None                    |
| Larynx cancer              | Dichotomous  | 1000            | 10%             | None                    |
| Nasopharynx cancer         | Dichotomous  | 1000            | 10%             | None                    |
| Other pharynx cancer       | Dichotomous  | 1000            | 10%             | None                    |
| Ischemic heart disease     | Dichotomous  | 1000            | 0%              | None                    |

### *Section 3.5: Quantifying between-study heterogeneity*

The gamma solution and its standard deviation (SD) quantifies the degree of heterogeneity observed in the included observations, while the SD quantifies the uncertainty around gamma, both of which contribute to our final conservative BPRF and RR uncertainty estimates. Within all dichotomous risk factors evaluated using the BPRF methodology, gamma solution values range from 0 to 0.59 with a mean of 0.07 (SD: 0.15).

**Table S12: Gamma solution for each risk-outcome pair quantifying between-study heterogeneity**

| Health outcome             | Gamma solution (SD)            |
|----------------------------|--------------------------------|
| Stroke                     | $4.7 \times 10^{-06}$ (0.0076) |
| Lip and oral cavity cancer | 0.53 (0.11)                    |
| Esophageal cancer          | 0.092 (0.051)                  |
| Larynx cancer              | 0.39 (0.14)                    |
| Nasopharynx cancer         | 0.34 (0.16)                    |
| Other pharynx cancer       | 0.43 (0.13)                    |
| Ischemic heart disease     | 0.24 (0.15)                    |

### **Section 4: Sensitivity Analyses**

We conducted a number of sensitivity analyses to evaluate the robustness of our primary results with regard to changes in model parameters and data point inclusion. Each sensitivity analysis with more than 10 observations was conducted with and without 10% trimming, while observations with fewer than 10 observations were only feasible to conduct without trimming. For outcomes with sufficient data points to include 10% trimming in the primary analysis, we conducted an additional sensitivity analysis with the original dataset and other parameters but omitting the trimming of any data points. It was only feasible to run these analyses when data point restrictions still allowed for the inclusion of more than two observations. The sensitivity analyses included:

- **No covariates included:** Using no bias covariates to account for potential systematic biases. In this analysis, no adjustments would be made to observations to account for the patterns of significant biases detected in the covariate selection algorithm. Other parameters and the included observations were kept the same.
- **Removed data with <5 exposed/unexposed cases or controls:** We removed observations with very small samples in the traditional four-by-four table used to derive measures of excess risk. Specifically, we omitted observations that had fewer than five tobacco chewers with the outcome, fewer than five tobacco chewers without the outcome, fewer than five non-chewers with the outcome, or fewer than five non-chewers without the outcome. This analysis examines the potential impact of small studies on our results. Other parameters were kept the same.
- **Used only data points that defined tobacco chewers as current users:** Using only data points where the exposed group was reported to be current chewers (versus a reference group of non-chewers). This exposure temporality reflects the closest match to our gold-standard exposure definition and excludes observations that were estimated using ever chewers as the exposed group and never chewers as the reference group. Other parameters were kept the same.
- **Removed data points using aggregate outcome definitions:** This analysis was only relevant for the head and neck cancer outcomes. For these models, we removed observations that used an aggregate outcome definition and kept only observations that were specific to the head and neck cancer outcome in question. Other parameters were kept the same.
- **Used only male-specific data points:** We restricted the dataset to only observations that were estimated from a male-only sample. To ensure we capture the full impact of sex-specific observations, we also included male-specific observations that had not been selected for the primary analysis in favor of observations derived from an analytic sample with both males and females. Other parameters were kept the same.
- **Used only female-specific data points:** We restricted the dataset to only observations that were estimated from a female-only sample. To ensure we capture the full impact of sex-specific observations, we also included female-specific observations that had not been selected for the primary analysis in favor of observations derived from an analytic sample with both males and females. Other parameters were kept the same.
- **Used only data points from studies conducted in Asian countries:** We restricted the dataset to only observations that were estimated from studies conducted in Asian countries, which may have greater homogeneity in the types of chewing tobacco products used. Other parameters were kept the same.
- **Used only data points from non-smoking samples:** We restricted the dataset to only observations that were estimated from a sample of non-smokers. Other parameters were kept the same.
- **Did not apply any downweighting based on overlapping samples:** We removed the adjustment factors used to account for effect sizes derived from non-mutually exclusive analytical samples to examine the impact of this adjustment on our analyses. In this sensitivity analysis, all observations are equally weighted in the input dataset.

Section 4.1: Sensitivity analyses for the relationship between chewing tobacco and stroke

**Table S13: Results of sensitivity analyses for chewing tobacco and stroke**

| Sensitivity Analysis                                            | % trimming | RR (95% UI without $\gamma$ ) | RR (95% UI with $\gamma$ ) | BPRF | ROS   | Star rating | Pub. bias | No. of studies | Selected covariates |
|-----------------------------------------------------------------|------------|-------------------------------|----------------------------|------|-------|-------------|-----------|----------------|---------------------|
| Primary analysis                                                | 0%         | 1.46 (1.28-1.68)              | 1.46 (1.11-1.93)           | 1.16 | 0.07  | 2           | No        | 3              | None                |
| No covariates included                                          | 0%         | 1.46 (1.28-1.68)              | 1.46 (1.11-1.93)           | 1.16 | 0.07  | 2           | No        | 3              | None                |
| Removed data with <5 exposed/unexposed cases or controls        | 0%         | 1.46 (1.28-1.68)              | 1.46 (1.11-1.93)           | 1.16 | 0.07  | 2           | No        | 3              | None                |
| Used only male-specific data points                             | 0%         | 1.70 (1.10-2.63)              | 1.70 (0.67-4.35)           | 0.77 | -0.13 | 1           | No        | 2              | None                |
| Did not apply any downweighing based on overlapping samples     | 0%         | 1.47 (1.28-1.68)              | 1.47 (1.11-1.94)           | 1.16 | 0.08  | 2           | No        | 3              | None                |
| Used only data points from studies conducted in Asian countries | 0%         | 1.46 (1.28-1.68)              | 1.46 (1.11-1.93)           | 1.16 | 0.07  | 2           | No        | 3              | None                |



Section 4.2: Sensitivity analyses for the relationship between chewing tobacco and ischemic heart disease

**Table S14: Results of sensitivity analyses for chewing tobacco and ischemic heart disease**

| Sensitivity Analysis                                                | % interested | RR (95% UI with $\gamma$ ) | RR (95% UI without $\gamma$ ) | BPRF | ROS | Star rating | Pub. bias | No. of studies | Selected covariates |
|---------------------------------------------------------------------|--------------|----------------------------|-------------------------------|------|-----|-------------|-----------|----------------|---------------------|
| Primary analysis                                                    | 0%           | 1.30 (0.88-1.92)           | 1.30 (0.29-5.83)              | N/A  | N/A | N/A         | No        | 8              | None                |
| No covariates included                                              | 0%           | 1.30 (0.88-1.92)           | 1.30 (0.29-5.83)              | N/A  | N/A | N/A         | No        | 8              | None                |
| Removed data with <5 exposed/unexposed cases or controls            | 0%           | 1.35 (0.88-2.06)           | 1.35 (0.27-6.68)              | N/A  | N/A | N/A         | No        | 7              | None                |
| Used only data points that defined tobacco chewers as current users | 0%           | 1.07 (0.86-1.33)           | 1.07 (0.59-1.92)              | N/A  | N/A | N/A         | No        | 3              | None                |
| Used only data points from studies conducted in Asian countries     | 0%           | 1.31 (0.64-2.68)           | 1.31 (0.12-14.39)             | N/A  | N/A | N/A         | No        | 5              | None                |
| Did not apply any downweighing based on overlapping samples         | 0%           | 1.29 (0.87-1.90)           | 1.29 (0.28-5.89)              | N/A  | N/A | N/A         | No        | 8              | None                |
| Used only data points from non-smoking samples                      | 0%           | 1.17 (0.97-1.40)           | 1.71 (0.81-1.69)              | N/A  | N/A | N/A         | No        | 3              | None                |

Section 4.3: Sensitivity analyses for the relationship between chewing tobacco and esophageal cancer

**Table S15: Results of sensitivity analyses for chewing tobacco and esophageal cancer**

| Sensitivity Analysis                                     | % trimming | RR (95% UI without $\gamma$ ) | RR (95% UI with $\gamma$ ) | BPRF | ROS   | Star rating | Pub. bias | No. of studies | Selected covariates                                    |
|----------------------------------------------------------|------------|-------------------------------|----------------------------|------|-------|-------------|-----------|----------------|--------------------------------------------------------|
| Primary analysis                                         | 10%        | 2.14 (1.77-2.57)              | 2.14 (0.89-5.15)           | 1.02 | 0.01  | 2           | No        | 22             | Maximally adjusted, Adjusted for smoking, age, and sex |
|                                                          | 0%         | 2.57 (1.75-3.78)              | 2.57 (0.27-24.07)          | 0.39 | -0.47 | 1           | No        | 22             | Maximally adjusted, Adjusted for smoking, age, and sex |
| No covariates included                                   | 10%        | 2.13 (1.77-2.57)              | 2.13 (0.88-5.15)           | 1.02 | 0.01  | 2           | No        | 22             | None                                                   |
|                                                          | 0%         | 2.57 (1.75-3.78)              | 2.57 (0.27-24.07)          | 0.39 | -0.47 | 1           | No        | 22             | None                                                   |
| Removed data with <5 exposed/unexposed cases or controls | 10%        | 2.06 (1.69-2.51)              | 2.06 (0.77-5.52)           | 0.9  | -0.05 | 1           | No        | 22             | Maximally adjusted, Adjusted for smoking, age, and sex |
|                                                          | 0%         | 2.61 (1.76-3.85)              | 2.61 (0.27-24.86)          | 0.39 | -0.47 | 1           | No        | 22             | Maximally adjusted, Adjusted for smoking, age, and sex |
| Removed data points using aggregate outcome definitions  | 10%        | 2.09 (1.72-2.55)              | 2.09 (0.84-5.23)           | 0.97 | -0.02 | 1           | No        | 20             | Maximally adjusted, Adjusted for                       |

|                                                                     |     |                  |                  |      |       |   |    |    |                                                             |
|---------------------------------------------------------------------|-----|------------------|------------------|------|-------|---|----|----|-------------------------------------------------------------|
|                                                                     |     |                  |                  |      |       |   |    |    | smoking, age, and sex                                       |
|                                                                     | 0%  | 2.11 (1.61-2.75) | 2.11 (0.51-8.76) | 0.64 | -0.23 | 1 | No | 20 | Maximally adjusted, Adjusted for smoking, age, and sex      |
| Used only data points that defined tobacco chewers as current users | 10% | 2.49 (2.08-2.98) | 2.49 (1.54-4.05) | 1.66 | 0.25  | 3 | No | 8  | Chewing tobacco product, Maximally adjusted, Representative |
|                                                                     | 0%  | 2.08 (1.45-2.97) | 2.08 (0.52-8.26) | 0.65 | -0.21 | 1 | No | 8  | Chewing tobacco product, Maximally adjusted                 |
| Used only male-specific data points                                 | 0%  | 1.64 (1.21-2.23) | 1.64 (0.48-5.63) | 0.58 | -0.27 | 1 | No | 9  | Maximally adjusted, Adjusted for smoking, age, and sex      |
| Used only female-specific data points                               | 0%  | 2.14 (1.35-3.4)  | 2.14 (0.52-8.87) | 0.65 | -0.22 | 1 | No | 4  | Maximally adjusted                                          |
| Used only data points from studies conducted in Asian countries     | 10% | 2.1 (1.72-2.56)  | 2.1 (0.8-5.5)    | 0.94 | -0.03 | 1 | No | 21 | Sub-population                                              |
|                                                                     | 0%  | 2.67 (1.79-3.98) | 2.67 (0.27-25.9) | 0.40 | -0.46 | 1 | No | 21 | Maximally adjusted, Adjusted for smoking, age, and sex      |
| Did not apply any downweighing based on overlapping samples         | 10% | 2.19 (1.78-2.7)  | 2.19 (0.79-6.1)  | 0.93 | -0.04 | 1 | No | 22 | Maximally adjusted, Adjusted for smoking, age,              |

|                                                    |    |                      |                          |      |       |   |    |    |                                                                    |
|----------------------------------------------------|----|----------------------|--------------------------|------|-------|---|----|----|--------------------------------------------------------------------|
|                                                    |    |                      |                          |      |       |   |    |    | and sex,<br>Aggregate<br>outcome<br>definition                     |
|                                                    | 0% | 2.58 (1.76-<br>3.8)  | 2.58<br>(0.27-<br>24.28) | 0.39 | -0.47 | 1 | No | 22 | Maximally<br>adjusted,<br>Adjusted for<br>smoking, age,<br>and sex |
| Used only data points from non-<br>smoking samples | 0% | 3.29 (1.58-<br>6.86) | 3.29<br>(0.32-<br>34.17) | 0.46 | -0.39 | 1 | No | 4  | None                                                               |

Section 4.4: Sensitivity analyses for the relationship between chewing tobacco and lip and oral cavity cancer

**Table S16: Results of sensitivity analyses for chewing tobacco and lip and oral cavity cancer**

| Sensitivity Analysis                                     | % trimming | RR (95% UI without $\gamma$ ) | RR (95% UI with $\gamma$ ) | BPRF | ROS   | Star rating | Pub. bias | No. of studies | Selected covariates                                                                                                                  |
|----------------------------------------------------------|------------|-------------------------------|----------------------------|------|-------|-------------|-----------|----------------|--------------------------------------------------------------------------------------------------------------------------------------|
| Primary analysis                                         | 10%        | 3.64 (3-4.41)                 | 3.64 (0.66-19.95)          | 0.87 | -0.07 | 1           | No        | 70             | Chewing tobacco product, Sub-population                                                                                              |
|                                                          | 0%         | 3.81 (3.06-4.76)              | 3.81 (0.5-29.3)            | 0.69 | -0.19 | 1           | No        | 70             | Chewing tobacco product, Sub-population                                                                                              |
| No covariates included                                   | 10%        | 3.64 (3-4.41)                 | 3.64 (0.66-19.96)          | 0.87 | -0.07 | 1           | No        | 70             | None                                                                                                                                 |
|                                                          | 0%         | 3.81 (3.06-4.76)              | 3.81 (0.5-29.3)            | 0.69 | -0.19 | 1           | No        | 70             | None                                                                                                                                 |
| Removed data with <5 exposed/unexposed cases or controls | 10%        | 3.61 (2.98-4.38)              | 3.61 (0.68-19.22)          | 0.89 | -0.06 | 1           | No        | 64             | Chewing tobacco product, Sub-population                                                                                              |
|                                                          | 0%         | 3.71 (2.97-4.64)              | 3.71 (0.5-27.5)            | 0.69 | -0.18 | 1           | No        | 64             | Chewing tobacco product, Sub-population                                                                                              |
| Removed data points using aggregate outcome definitions  | 10%        | 3.96 (3.09-5.06)              | 3.96 (0.62-25.43)          | 0.83 | -0.09 | 1           | No        | 49             | Chewing tobacco product, Adjusted for age and sex, Geographically representative, Adjusted for age, sex, and smoking, Sub-population |
|                                                          | 0%         | 3.89 (2.97-5.11)              | 3.89 (0.45-33.46)          | 0.64 | -0.22 | 1           | No        | 49             | Chewing tobacco product, Sub-population, Adjusted for age                                                                            |

|                                                                     |     |                     |                   |      |       |   |    |    |                                                                   |
|---------------------------------------------------------------------|-----|---------------------|-------------------|------|-------|---|----|----|-------------------------------------------------------------------|
|                                                                     |     |                     |                   |      |       |   |    |    | and sex, Adjusted for age, sex, and smoking                       |
| Used only data points that defined tobacco chewers as current users | 10% | 3.62<br>(2.44-5.35) | 3.62 (0.53-24.86) | 0.72 | -0.17 | 1 | No | 17 | Adjusted for age and sex, Sub-population, Representative          |
|                                                                     | 0%  | 3.47<br>(2.39-5.04) | 3.47 (0.53-22.7)  | 0.72 | -0.17 | 1 | No | 17 | Adjusted for age and sex, Sub-population                          |
| Used only male-specific data points                                 | 10% | 3.42<br>(2.53-4.62) | 3.42 (0.57-20.35) | 0.77 | -0.13 | 1 | No | 24 | Aggregate outcome definition, Chewing tobacco product             |
|                                                                     | 0%  | 3.35<br>(2.42-4.62) | 3.35 (0.47-23.76) | 0.65 | -0.22 | 1 | No | 24 | Aggregate outcome definition, Chewing tobacco product             |
| Used only female-specific data points                               | 10% | 5.45<br>(3.21-9.27) | 5.45 (0.55-53.72) | 0.8  | -0.11 | 1 | No | 11 | Adjusted for age and sex, Exposure temporality                    |
|                                                                     | 0%  | 6.6 (3.55-12.3)     | 6.6 (0.4-109.58)  | 0.63 | -0.23 | 1 | No | 11 | Adjusted for age and sex, Exposure temporality                    |
| Used only data points from studies conducted in Asian countries     | 10% | 3.98<br>(3.28-4.85) | 3.98 (0.78-20.44) | 1.01 | 0.01  | 2 | No | 63 | Adjusted for age and sex, Chewing tobacco product                 |
|                                                                     | 0%  | 4.18<br>(3.32-5.25) | 4.18 (0.56-31.45) | 0.77 | -0.13 | 1 | No | 63 | Adjusted for age and sex, Chewing tobacco product, Sub-population |
| Did not apply any downweighing based on overlapping samples         | 10% | 3.73<br>(3.08-4.53) | 3.73 (0.66-21.08) | 0.87 | -0.07 | 1 | No | 70 | Adjusted for age and sex, Chewing tobacco product, Sub-population |
|                                                                     | 0%  | 3.81<br>(3.06-4.75) | 3.81 (0.5-28.94)  | 0.70 | -0.18 | 1 | No | 70 | Chewing tobacco product, Sub-population                           |

|                                                |     |                         |                       |      |       |   |    |    |      |
|------------------------------------------------|-----|-------------------------|-----------------------|------|-------|---|----|----|------|
| Used only data points from non-smoking samples | 10% | 3.96<br>(2.77-<br>5.64) | 3.96 (0.84-<br>18.59) | 1.08 | 0.04  | 2 | No | 15 | None |
|                                                | 0%  | 4 (2.55-<br>6.28)       | 4 (0.43-<br>37.53)    | 0.61 | -0.25 | 1 | No | 15 | None |

Section 4.5: Sensitivity analyses for the relationship between chewing tobacco and laryngeal cancer

**Table S17: Results of sensitivity analyses for chewing tobacco and laryngeal cancer**

| Sensitivity Analysis                                                | % trimming | RR (95% UI without $\gamma$ ) | RR (95% UI with $\gamma$ ) | BPRF | ROS   | Star rating | Pub. bias | No. of studies | Selected covariates                                    |
|---------------------------------------------------------------------|------------|-------------------------------|----------------------------|------|-------|-------------|-----------|----------------|--------------------------------------------------------|
| Primary analysis                                                    | 10%        | 2.66 (1.98-3.57)              | 2.66 (0.52-13.63)          | 0.68 | -0.20 | 1           | No        | 24             | Aggregate outcome definition, Adjusted for age and sex |
|                                                                     | 0%         | 2.78 (1.91-4.06)              | 2.78 (0.29-27.11)          | 0.41 | -0.44 | 1           | No        | 24             | Aggregate outcome definition, Adjusted for age and sex |
| No covariates included                                              | 10%        | 2.66 (1.98-3.57)              | 2.66 (0.52-13.63)          | 0.68 | -0.20 | 1           | No        | 24             | None                                                   |
|                                                                     | 0%         | 2.78 (1.91-4.06)              | 2.78 (0.29-27.11)          | 0.41 | -0.44 | 1           | No        | 24             | None                                                   |
| Removed data with <5 exposed/unexposed cases or controls            | 10%        | 2.58 (1.91-3.48)              | 2.58 (0.51-13.07)          | 0.66 | -0.21 | 1           | No        | 22             | Aggregate outcome definition, Adjusted for age and sex |
|                                                                     | 0%         | 2.72 (1.83-4.03)              | 2.72 (0.27-27.53)          | 0.39 | -0.47 | 1           | No        | 22             | Aggregate outcome definition, Adjusted for age and sex |
| Removed data points using aggregate outcome definitions             | 10%        | 1.16 (0.99-1.35)              | 1.16 (0.76-1.78)           | N/A  | N/A   | N/A         | No        | 9              | Chewing tobacco product, Representative                |
|                                                                     | 0%         | 1.6 (1.02-2.52)               | 1.6 (0.25-10.33)           | 0.34 | -0.55 | 1           | No        | 9              | Chewing tobacco product, Representative                |
| Used only data points that defined tobacco chewers as current users | 0%         | 1.80 (0.97-3.35)              | 1.80 (0.25-13.22)          | N/A  | N/A   | N/A         | No        | 5              | Chewing tobacco product                                |



|                                                                 |     |                  |                   |      |       |   |    |    |                                                        |
|-----------------------------------------------------------------|-----|------------------|-------------------|------|-------|---|----|----|--------------------------------------------------------|
| Used only male-specific data points                             | 10% | 1.75 (1.3-2.35)  | 1.75 (0.54-5.65)  | 0.65 | -0.21 | 1 | No | 11 | Aggregate outcome definition, Sub-population           |
|                                                                 | 0%  | 2.28 (1.51-3.44) | 2.28 (0.37-14.13) | 0.49 | -0.35 | 1 | No | 11 | Aggregate outcome definition, Sub-population           |
| Used only data points from studies conducted in Asian countries | 10% | 2.95 (2.17-4.01) | 2.95 (0.6-14.44)  | 0.78 | -0.13 | 1 | No | 21 | Adjusted for age and sex, Aggregate outcome definition |
|                                                                 | 0%  | 3.02 (1.98-4.58) | 3.02 (0.28-32.93) | 0.41 | -0.45 | 1 | No | 21 | Adjusted for age and sex, Aggregate outcome definition |
| Did not apply any downweighing based on overlapping samples     | 10% | 2.65 (1.98-3.56) | 2.65 (0.52-13.61) | 0.67 | -0.2  | 1 | No | 24 | Aggregate outcome definition, Adjusted for age and sex |
|                                                                 | 0%  | 2.78 (1.9-4.05)  | 2.78 (0.29-27.05) | 0.41 | -0.44 | 1 | No | 24 | Aggregate outcome definition, Adjusted for age and sex |
| Used only data points from non-smoking samples                  | 0%  | 4.22 (2.85-6.24) | 4.22 (1.2-14.83)  | 1.47 | 0.19  | 3 | No | 5  | Self-reported outcome                                  |

Section 4.6: Sensitivity analyses for the relationship between chewing tobacco and nasopharynx cancer

**Table S18: Results of sensitivity analyses for chewing tobacco and nasopharynx cancer**

| Sensitivity Analysis                                                | % trimming | RR (95% UI without $\gamma$ ) | RR (95% UI with $\gamma$ ) | BPRF | ROS   | Star rating | Pub. bias | No. of studies | Selected covariates                                                         |
|---------------------------------------------------------------------|------------|-------------------------------|----------------------------|------|-------|-------------|-----------|----------------|-----------------------------------------------------------------------------|
| Primary analysis                                                    | 10%        | 2.5 (1.79-3.49)               | 2.5 (0.49-12.66)           | 0.64 | -0.22 | 1           | No        | 17             | Maximally adjusted, Adjusted for age and sex                                |
|                                                                     | 0%         | 3.13 (1.95-5.04)              | 3.13 (0.25-38.63)          | 0.38 | -0.48 | 1           | No        | 17             | Maximally adjusted, Adjusted for age and sex                                |
| No covariates included                                              | 10%        | 2.5 (1.79-3.49)               | 2.5 (0.49-12.66)           | 0.64 | -0.22 | 1           | No        | 17             | None                                                                        |
|                                                                     | 0%         | 3.13 (1.95-5.04)              | 3.13 (0.25-38.63)          | 0.38 | -0.48 | 1           | No        | 17             | None                                                                        |
| Removed data with <5 exposed/unexposed cases or controls            | 10%        | 2.53 (1.79-3.57)              | 2.53 (0.48-13.2)           | 0.63 | -0.23 | 1           | No        | 16             | Maximally adjusted, Adjusted for age and sex                                |
|                                                                     | 0%         | 3.21 (1.96-5.26)              | 3.21 (0.25-41.88)          | 0.37 | -0.49 | 1           | No        | 16             | Maximally adjusted, Adjusted for age and sex                                |
| Used only data points that defined tobacco chewers as current users | 0%         | 1.38 (0.89-2.12)              | 1.38 (0.42-4.45)           | N/A  | N/A   | N/A         | No        | 4              | None                                                                        |
| Used only male-specific data points                                 | 0%         | 2.51 (1.51-4.18)              | 2.51 (0.36-17.49)          | 0.49 | -0.35 | 1           | No        | 7              | Sub-population, Adjusted for smoking, age, and sex, Chewing tobacco product |

|                                                                 |     |                  |                   |      |       |     |    |    |                                                                                             |
|-----------------------------------------------------------------|-----|------------------|-------------------|------|-------|-----|----|----|---------------------------------------------------------------------------------------------|
| Used only female-specific data points                           | 0%  | 1.96 (1-3.85)    | 1.96 (0.35-10.89) | N/A  | N/A   | N/A | No | 2  | Maximally adjusted                                                                          |
| Used only data points from studies conducted in Asian countries | 10% | 2.5 (1.79-3.5)   | 2.5 (0.54-11.59)  | 0.69 | -0.18 | 1   | No | 16 | Adjusted for age and sex, Exposure temporality, Chewing tobacco product                     |
|                                                                 | 0%  | 3.4 (2.11-5.49)  | 3.4 (0.29-40.17)  | 0.43 | -0.42 | 1   | No | 16 | Adjusted for age and sex, Exposure temporality                                              |
| Did not apply any downweighing based on overlapping samples     | 10% | 2.49 (1.78-3.48) | 2.49 (0.48-12.78) | 0.63 | -0.23 | 1   | No | 17 | Maximally adjusted, Adjusted for age and sex, Exposure temporality, Chewing tobacco product |
|                                                                 | 0%  | 3.13 (1.94-5.03) | 3.13 (0.25-38.7)  | 0.38 | -0.49 | 1   | No | 17 | Maximally adjusted, Adjusted for age and sex, Exposure temporality, Chewing tobacco product |
| Used only data points from non-smoking samples                  | 0%  | 2.96 (1.67-5.25) | 2.96 (0.39-22.42) | 0.54 | -0.31 | 1   | No | 6  | None                                                                                        |

Section 4.7: Sensitivity analyses for the relationship between chewing tobacco and other pharynx cancer

Table S19: Results of sensitivity analyses for chewing tobacco and other pharynx cancer

| Sensitivity Analysis                                     | % trimming | RR (95% UI without $\gamma$ ) | RR (95% UI with $\gamma$ ) | BPRF | ROS   | Star rating | Pub. bias | No. of studies | Selected covariates                                    |
|----------------------------------------------------------|------------|-------------------------------|----------------------------|------|-------|-------------|-----------|----------------|--------------------------------------------------------|
| Primary analysis                                         | 10%        | 2.33 (1.8-3.01)               | 2.33 (0.45-12.04)          | 0.59 | -0.27 | 1           | No        | 31             | Aggregate outcome definition, Adjusted for age and sex |
|                                                          | 0%         | 2.75 (2-3.78)                 | 2.75 (0.32-23.32)          | 0.46 | -0.39 | 1           | No        | 31             | Adjusted for age and sex, Aggregate outcome definition |
| No covariates included                                   | 10%        | 2.33 (1.8-3.01)               | 2.33 (0.45-12.04)          | 0.59 | -0.27 | 1           | No        | 31             | None                                                   |
|                                                          | 0%         | 2.75 (2-3.78)                 | 2.75 (0.32-23.32)          | 0.46 | -0.39 | 1           | No        | 31             | None                                                   |
| Removed data with <5 exposed/unexposed cases or controls | 10%        | 2.36 (1.81-3.08)              | 2.36 (0.44-12.65)          | 0.58 | -0.27 | 1           | No        | 29             | Adjusted for age and sex, Aggregate outcome definition |
|                                                          | 0%         | 2.82 (2.02-3.93)              | 2.82 (0.32-25.05)          | 0.45 | -0.4  | 1           | No        | 29             | Aggregate outcome definition, Adjusted for age and sex |
| Removed data points using aggregate outcome definitions  | 10%        | 1.45 (1.06-1.98)              | 1.45 (0.43-4.85)           | 0.52 | -0.32 | 1           | No        | 9              | Maximally adjusted, Adjusted for smoking, age, and sex |
|                                                          | 0%         | 1.63 (1.03-2.59)              | 1.63 (0.24-11.15)          | 0.33 | -0.56 | 1           | No        | 9              | Maximally adjusted,                                    |

|                                                                     |     |                  |                   |      |       |     |    |    |                                                                                            |
|---------------------------------------------------------------------|-----|------------------|-------------------|------|-------|-----|----|----|--------------------------------------------------------------------------------------------|
|                                                                     |     |                  |                   |      |       |     |    |    | Adjusted for smoking, age, and sex                                                         |
| Used only data points that defined tobacco chewers as current users | 10% | 1.73 (1-2.98)    | 1.73 (0.29-10.41) | N/A  | N/A   | N/A | No | 6  | Maximally adjusted, Adjusted for smoking, age, and sex                                     |
|                                                                     | 0%  | 1.84 (1.18-2.89) | 1.84 (0.38-8.85)  | 0.49 | -0.35 | 1   | No | 6  | Adjusted for smoking, age, and sex, Maximally adjusted                                     |
| Used only male-specific data points                                 | 10% | 1.66 (1.27-2.19) | 1.66 (0.48-5.81)  | 0.58 | -0.27 | 1   | No | 14 | Aggregate outcome definition, Adjusted for age, sex, and smoking                           |
|                                                                     | 0%  | 1.8 (1.28-2.53)  | 1.8 (0.35-9.3)    | 0.45 | -0.40 | 1   | No | 14 | Aggregate outcome definition, Adjusted for age, sex, and smoking                           |
| Used only female-specific data points                               | 0%  | 1.96 (1-3.85)    | 1.96 (0.35-10.89) | N/A  | N/A   | N/A | No | 2  | Maximally adjusted                                                                         |
| Used only data points from studies conducted in Asian countries     | 10% | 2.48 (1.89-3.27) | 2.48 (0.47-13.16) | 0.61 | -0.24 | 1   | No | 27 | Adjusted for age and sex, Aggregate outcome definition, Adjusted for age, sex, and smoking |
|                                                                     | 0%  | 2.99 (2.12-4.22) | 2.99 (0.33-26.9)  | 0.47 | -0.37 | 1   | No | 27 | Adjusted for age and sex,                                                                  |

|                                                              |     |                  |                   |      |       |   |    |    |                                                                  |
|--------------------------------------------------------------|-----|------------------|-------------------|------|-------|---|----|----|------------------------------------------------------------------|
|                                                              |     |                  |                   |      |       |   |    |    | Aggregate outcome definition, Adjusted for age, sex, and smoking |
| Did not apply any downweighting based on overlapping samples | 10% | 2.33 (1.8-3.01)  | 2.33 (0.45-12.06) | 0.59 | -0.27 | 1 | No | 31 | Adjusted for age and sex, Aggregate outcome definition           |
|                                                              | 0%  | 2.75 (2-3.78)    | 2.75 (0.32-23.34) | 0.46 | -0.39 | 1 | No | 31 | Adjusted for age and sex, Aggregate outcome definition           |
| Used only data points from non-smoking samples               | 10% | 4.38 (3.06-6.27) | 4.38 (1.09-17.58) | 1.36 | 0.15  | 3 | No | 10 | Self-reported outcome                                            |
|                                                              | 0%  | 4.37 (2.76-6.93) | 4.37 (0.61-31.43) | 0.84 | -0.09 | 1 | No | 10 | Self-reported outcome                                            |

#### Section 4.8: Study characteristics and observations for sex-specific sensitivity analyses

The following tables depict study characteristics and observations that were not included in the primary analysis in favor of their both-sexes counterpart reported in the same studies. These observations were included in the sex-specific sensitivity analyses in addition to the sex-specific observations included in the primary analysis.

**Table S20: Study characteristics for male-specific sensitivity analysis**

| Author           | Year | Health outcome             | Study name | Location    | Study design        | Sex   | Age start | Age end | Exposure assessment | Outcome assessment method                            | Endpoint  | Sample size | Exposed | Follow-up (years) | Person-years | Events | Cases | Controls | Control pool | Smoking status     | Chewing tobacco type |
|------------------|------|----------------------------|------------|-------------|---------------------|-------|-----------|---------|---------------------|------------------------------------------------------|-----------|-------------|---------|-------------------|--------------|--------|-------|----------|--------------|--------------------|----------------------|
| Sankaranarayanan | 1991 | Esophageal cancer          | N/A        | Kerala      | Case-control        | Males | 18        | 99      | Self-report         | Physician diagnosis; Biomarker                       | Morbidity | NA          | NA      | N/A               | NA           | NA     | 189   | 541      | Hospital     | Any smoking status | Pan With Tobacco     |
| Muwonge          | 2008 | Lip and oral cavity cancer | N/A        | Kerala      | Nested case-control | Males | 35        | 99      | Self-report         | Physician diagnosis; Biomarker                       | Incidence | NA          | NA      | 8                 | NA           | NA     | 163   | 815      | Community    | Any smoking status | Exact                |
| Nandakumar       | 1990 | Lip and oral cavity cancer | N/A        | Karnataka   | Case-control        | Males | 15        | 99      | Self-report         | Biomarker                                            | Morbidity | NA          | NA      | N/A               | NA           | NA     | 115   | 115      | Hospital     | Any smoking status | Pan With Tobacco     |
| Ray              | 2013 | Lip and oral cavity cancer | N/A        | West Bengal | Case-control        | Males | 10        | 99      | Self-report         | Physician diagnosis; Biomarker                       | Morbidity | NA          | NA      | N/A               | NA           | NA     | NA    | NA       | Hospital     | Any smoking status | Exact                |
| Sankaranarayanan | 1989 | Lip and oral cavity cancer | N/A        | Kerala      | Case-control        | Males | 18        | 99      | Self-report         | Physician diagnosis; Biomarker                       | Morbidity | NA          | NA      | N/A               | NA           | NA     | 150   | 310      | Hospital     | Any smoking status | Pan With Tobacco     |
| Sankaranarayanan | 1990 | Lip and oral cavity cancer | N/A        | Kerala      | Case-control        | Males | 15        | 99      | Self-report         | Administrative medical records or disease registries | Morbidity | NA          | NA      | N/A               | NA           | NA     | 240   | 542      | Hospital     | Any smoking status | Pan With Tobacco     |
| Sankaranarayanan | 1989 | Lip and oral cavity cancer | N/A        | Kerala      | Case-control        | Males | 18        | 99      | Self-report         | Administrative medical records or disease registries | Morbidity | NA          | NA      | N/A               | NA           | NA     | 106   | 541      | Hospital     | Any smoking status | Pan With Tobacco     |
| Gajalakshmi      | 2015 | Stroke (unspecified)       | N/A        | Tamil Nadu  | Case-control        | Males | 35        | 69      | Self-report         | Death certificates                                   | Mortality | NA          | NA      | N/A               | NA           | NA     | 197   | 23,254   | Community    | Never smokers      | Exact                |
| Gajalakshmi      | 2015 | Stroke (unspecified)       | N/A        | Tamil Nadu  | Case-control        | Males | 35        | 69      | Self-report         | Death certificates                                   | Mortality | NA          | NA      | N/A               | NA           | NA     | 284   | 138,928  | Community    | Never smokers      | Exact                |

N/A, not available

**Table S21: Study characteristics for female-specific sensitivity analysis**

| Author           | Year | Health outcome             | Study name | Location    | Study design        | Sex     | Age start | Age end | Exposure assessment | Outcome assessment method                            | Endpoint  | Sample size | Exposed | Follow-up (years) | Person-years | Events | Cases | Controls | Control pool | Smoking status     | Chewing tobacco type |
|------------------|------|----------------------------|------------|-------------|---------------------|---------|-----------|---------|---------------------|------------------------------------------------------|-----------|-------------|---------|-------------------|--------------|--------|-------|----------|--------------|--------------------|----------------------|
| Sankaranarayanan | 1991 | Esophageal cancer          | N/A        | Kerala      | Case-control        | Females | 18        | 99      | Self-report         | Physician diagnosis; Biomarker                       | Morbidity | NA          | NA      | N/A               | NA           | NA     | 55    | 345      | Hospital     | Any smoking status | Pan With Tobacco     |
| Muwonge          | 2008 | Lip and oral cavity cancer | N/A        | Kerala      | Nested case-control | Females | 35        | 99      | Self-report         | Physician diagnosis; Biomarker                       | Incidence | NA          | NA      | 8                 | NA           | NA     | 119   | 595      | Community    | Any smoking status | Exact                |
| Nandakumar       | 1990 | Lip and oral cavity cancer | N/A        | Karnataka   | Case-control        | Females | 15        | 99      | Self-report         | Biomarker                                            | Morbidity | NA          | NA      | N/A               | NA           | NA     | 233   | 233      | Hospital     | Any smoking status | Pan With Tobacco     |
| Ray              | 2013 | Lip and oral cavity cancer | N/A        | West Bengal | Case-control        | Females | 10        | 99      | Self-report         | Physician diagnosis; Biomarker                       | Morbidity | NA          | NA      | N/A               | NA           | NA     | NA    | NA       | Hospital     | Any smoking status | Exact                |
| Sankaranarayanan | 1989 | Lip and oral cavity cancer | N/A        | Kerala      | Case-control        | Females | 18        | 99      | Self-report         | Physician diagnosis; Biomarker                       | Morbidity | NA          | NA      | N/A               | NA           | NA     | 75    | 345      | Hospital     | Any smoking status | Pan With Tobacco     |
| Sankaranarayanan | 1990 | Lip and oral cavity cancer | N/A        | Kerala      | Case-control        | Females | 15        | 99      | Self-report         | Administrative medical records or disease registries | Morbidity | NA          | NA      | N/A               | NA           | NA     | 162   | 345      | Hospital     | Any smoking status | Pan With Tobacco     |
| Sankaranarayanan | 1989 | Lip and oral cavity cancer | N/A        | Kerala      | Case-control        | Females | 18        | 99      | Self-report         | Administrative medical records or disease registries | Morbidity | NA          | NA      | N/A               | NA           | NA     | 66    | 138      | Hospital     | Any smoking status | Pan With Tobacco     |

N/A, not available

**Table S22: Additional data inputs for sex-specific sensitivity analyses**

| Author                | Health outcome    | Sex    | Log effect size | Standard error of the log effect size |
|-----------------------|-------------------|--------|-----------------|---------------------------------------|
| Sankaranarayanan 1991 | Esophageal cancer | Female | -0.075          | 0.28                                  |



|                       |                            |        |      |      |
|-----------------------|----------------------------|--------|------|------|
| Muwonge 2008          | Lip and oral cavity cancer | Female | 2.25 | 0.33 |
| Sankaranarayanan 1989 | Lip and oral cavity cancer | Female | 1.85 | 0.36 |
| Sankaranarayanan 1990 | Lip and oral cavity cancer | Female | 1.97 | 0.27 |
| Nandakumar 1990       | Lip and oral cavity cancer | Female | 3.23 | 0.42 |
| Sankaranarayanan 1989 | Lip and oral cavity cancer | Female | 2.41 | 0.44 |
| Ray 2013              | Lip and oral cavity cancer | Female | 2.17 | 0.38 |
| Sankaranarayanan 1991 | Esophageal cancer          | Male   | 0.30 | 0.17 |
| Muwonge 2008          | Lip and oral cavity cancer | Male   | 0.99 | 0.21 |
| Sankaranarayanan 1989 | Lip and oral cavity cancer | Male   | 1.29 | 0.21 |
| Sankaranarayanan 1990 | Lip and oral cavity cancer | Male   | 2.38 | 0.20 |
| Nandakumar 1990       | Lip and oral cavity cancer | Male   | 1.28 | 0.39 |
| Sankaranarayanan 1989 | Lip and oral cavity cancer | Male   | 2.22 | 0.27 |
| Ray 2013              | Lip and oral cavity cancer | Male   | 1.61 | 0.32 |
| Gajalakshmi 2015      | Stroke                     | Male   | 0.79 | 0.16 |
| Gajalakshmi 2015      | Stroke                     | Male   | 0.10 | 0.23 |

## Section 5: GATHER and PRISMA checklists

### Section 5.1: PRISMA

**Table S23: PRISMA 2020 Abstract Checklist**

| Section and Topic       | Item # | Checklist item                                                                                                                                                                                                                                                                                        | Reported (Yes/No)                                                                                                                                                             |
|-------------------------|--------|-------------------------------------------------------------------------------------------------------------------------------------------------------------------------------------------------------------------------------------------------------------------------------------------------------|-------------------------------------------------------------------------------------------------------------------------------------------------------------------------------|
| <b>TITLE</b>            |        |                                                                                                                                                                                                                                                                                                       |                                                                                                                                                                               |
| Title                   | 1      | Identify the report as a systematic review.                                                                                                                                                                                                                                                           | Identified in the abstract but not in the title. The title reflects the review and meta-analysis methodology used.                                                            |
| <b>BACKGROUND</b>       |        |                                                                                                                                                                                                                                                                                                       |                                                                                                                                                                               |
| Objectives              | 2      | Provide an explicit statement of the main objective(s) or question(s) the review addresses.                                                                                                                                                                                                           | Yes                                                                                                                                                                           |
| <b>METHODS</b>          |        |                                                                                                                                                                                                                                                                                                       |                                                                                                                                                                               |
| Eligibility criteria    | 3      | Specify the inclusion and exclusion criteria for the review.                                                                                                                                                                                                                                          | Briefly, but more detail provided in the main text and Supplementary Information 1.2.                                                                                         |
| Information sources     | 4      | Specify the information sources (e.g. databases, registers) used to identify studies and the date when each was last searched.                                                                                                                                                                        | The fact that three databases were reviewed is mentioned; Space limitation required us to describe search details in the main text and Supplementary Information 1.1 and 3.1. |
| Risk of bias            | 5      | Specify the methods used to assess risk of bias in the included studies.                                                                                                                                                                                                                              | Yes, briefly as incorporated in the burden of proof meta-analytic approach; More detail provided in the main text and Supplementary Information 3.2.                          |
| Synthesis of results    | 6      | Specify the methods used to present and synthesise results.                                                                                                                                                                                                                                           | Yes, briefly; More detail provided in the main text and Supplementary Information 3.3.                                                                                        |
| <b>RESULTS</b>          |        |                                                                                                                                                                                                                                                                                                       |                                                                                                                                                                               |
| Included studies        | 7      | Give the total number of included studies and participants and summarise relevant characteristics of studies.                                                                                                                                                                                         | Space limitation required us to describe these details in the main text and Supplementary Information 2.1.                                                                    |
| Synthesis of results    | 8      | Present results for main outcomes, preferably indicating the number of included studies and participants for each. If meta-analysis was done, report the summary estimate and confidence/credible interval. If comparing groups, indicate the direction of the effect (i.e. which group is favoured). | Star rating is reported for each outcome, which is the culmination of the primary results. Further details and summary estimates are provided in the main text and Table 2.   |
| <b>DISCUSSION</b>       |        |                                                                                                                                                                                                                                                                                                       |                                                                                                                                                                               |
| Limitations of evidence | 9      | Provide a brief summary of the limitations of the evidence included in the review (e.g. study risk of bias, inconsistency and imprecision).                                                                                                                                                           | Not in abstract. Covered in detail in the main text.                                                                                                                          |
| Interpretation          | 10     | Provide a general interpretation of the results and important implications.                                                                                                                                                                                                                           | Yes                                                                                                                                                                           |
| <b>OTHER</b>            |        |                                                                                                                                                                                                                                                                                                       |                                                                                                                                                                               |
| Funding                 | 11     | Specify the primary source of funding for the review.                                                                                                                                                                                                                                                 | Not in abstract due to space constraints but described in the "Acknowledgements".                                                                                             |
| Registration            | 12     | Provide the register name and registration number.                                                                                                                                                                                                                                                    | No                                                                                                                                                                            |

**Table S24: PRISMA 2020 Manuscript Checklist**

| Section and Topic             | Item # | Checklist item                                                                                                                                                                                                                                                                                       | Location where item is reported                                                                                                                                |
|-------------------------------|--------|------------------------------------------------------------------------------------------------------------------------------------------------------------------------------------------------------------------------------------------------------------------------------------------------------|----------------------------------------------------------------------------------------------------------------------------------------------------------------|
| <b>TITLE</b>                  |        |                                                                                                                                                                                                                                                                                                      |                                                                                                                                                                |
| Title                         | 1      | Identify the report as a systematic review.                                                                                                                                                                                                                                                          | Not in the title due to focus on analytical methodology. Instead, this is explicitly stated in the Manuscript Abstract, Introduction, Discussion, and Methods. |
| <b>ABSTRACT</b>               |        |                                                                                                                                                                                                                                                                                                      |                                                                                                                                                                |
| Abstract                      | 2      | See the PRISMA 2020 for Abstracts checklist.                                                                                                                                                                                                                                                         | Supplementary Table S23                                                                                                                                        |
| <b>INTRODUCTION</b>           |        |                                                                                                                                                                                                                                                                                                      |                                                                                                                                                                |
| Rationale                     | 3      | Describe the rationale for the review in the context of existing knowledge.                                                                                                                                                                                                                          | Introduction (lines 45-72)                                                                                                                                     |
| Objectives                    | 4      | Provide an explicit statement of the objective(s) or question(s) the review addresses.                                                                                                                                                                                                               | Introduction (lines 74-81)                                                                                                                                     |
| <b>METHODS</b>                |        |                                                                                                                                                                                                                                                                                                      |                                                                                                                                                                |
| Eligibility criteria          | 5      | Specify the inclusion and exclusion criteria for the review and how studies were grouped for the syntheses.                                                                                                                                                                                          | Supplementary Information 1.2; Supplementary Information 3.1; Methods “Step 1” (lines 486-507)                                                                 |
| Information sources           | 6      | Specify all databases, registers, websites, organisations, reference lists and other sources searched or consulted to identify studies. Specify the date when each source was last searched or consulted.                                                                                            | Methods “Step 1” (lines 484-485); Supplementary Information 3.2; Introduction (lines 85-89; lines 116-123)                                                     |
| Search strategy               | 7      | Present the full search strategies for all databases, registers and websites, including any filters and limits used.                                                                                                                                                                                 | Supplementary Information 1.1                                                                                                                                  |
| Selection process             | 8      | Specify the methods used to decide whether a study met the inclusion criteria of the review, including how many reviewers screened each record and each report retrieved, whether they worked independently, and if applicable, details of automation tools used in the process.                     | Methods “Step 1” (lines 488-507); Supplementary Information 3.2                                                                                                |
| Data collection process       | 9      | Specify the methods used to collect data from reports, including how many reviewers collected data from each report, whether they worked independently, any processes for obtaining or confirming data from study investigators, and if applicable, details of automation tools used in the process. | Methods “Step 1” (lines 508-509; 516-520); Supplementary Information 1.5; Supplementary Information 3.2                                                        |
| Data items                    | 10a    | List and define all outcomes for which data were sought. Specify whether all results that were compatible with each outcome domain in each study were sought (e.g. for all measures, time points, analyses), and if not, the methods used to decide which results to collect.                        | Methods “Selecting the health outcomes of interest” (lines 466-481); Supplementary Information 1.3; Supplementary Information 1.5                              |
|                               | 10b    | List and define all other variables for which data were sought (e.g. participant and intervention characteristics, funding sources). Describe any assumptions made about any missing or unclear information.                                                                                         | Methods “Step 1” (lines 508-520); Supplementary Information 1.5                                                                                                |
| Study risk of bias assessment | 11     | Specify the methods used to assess risk of bias in the included studies, including details of the tool(s) used, how many reviewers assessed each study and whether they worked independently, and if applicable, details of automation tools used in the process.                                    | Methods “Step 3” (lines 555-566); Supplementary Information 3.3                                                                                                |
| Effect measures               | 12     | Specify for each outcome the effect measure(s) (e.g. risk ratio, mean difference) used in the synthesis or presentation of results.                                                                                                                                                                  | Methods “Step 2” and “Step 6” (lines 523-527, 584-603); Table 2 caption                                                                                        |
| Synthesis methods             | 13a    | Describe the processes used to decide which studies were eligible for each synthesis (e.g. tabulating the study intervention characteristics and comparing against the planned groups for each synthesis (item #5)).                                                                                 | Methods “Step 1” and “Step 2” (lines 493-507, 527-553); Supplementary Information 2.2                                                                          |
|                               | 13b    | Describe any methods required to prepare the data for presentation or synthesis, such as handling of missing summary statistics, or data conversions.                                                                                                                                                | Methods “Step 2” (lines 533-553); Supplementary Information 2.2; Supplementary Information 3.4                                                                 |
|                               | 13c    | Describe any methods used to tabulate or visually display results of individual studies and syntheses.                                                                                                                                                                                               | Captions of Figures 1, 2, 4-7                                                                                                                                  |

|                               |     |                                                                                                                                                                                                                                                                                      |                                                                                                                                                                                                                   |
|-------------------------------|-----|--------------------------------------------------------------------------------------------------------------------------------------------------------------------------------------------------------------------------------------------------------------------------------------|-------------------------------------------------------------------------------------------------------------------------------------------------------------------------------------------------------------------|
|                               | 13d | Describe any methods used to synthesize results and provide a rationale for the choice(s). If meta-analysis was performed, describe the model(s), method(s) to identify the presence and extent of statistical heterogeneity, and software package(s) used.                          | Methods Overview (lines 419-442); Code availability statement; Supplementary Information 3.4                                                                                                                      |
|                               | 13e | Describe any methods used to explore possible causes of heterogeneity among study results (e.g. subgroup analysis, meta-regression).                                                                                                                                                 | Methods “Step 4” (lines 569-578); Supplementary Information 3.4                                                                                                                                                   |
|                               | 13f | Describe any sensitivity analyses conducted to assess robustness of the synthesized results.                                                                                                                                                                                         | Methods “Model validation” (lines 606-634); Supplementary Information 4                                                                                                                                           |
| Reporting bias assessment     | 14  | Describe any methods used to assess risk of bias due to missing results in a synthesis (arising from reporting biases).                                                                                                                                                              | Methods “Step 5” (lines 580-582)                                                                                                                                                                                  |
| Certainty assessment          | 15  | Describe any methods used to assess certainty (or confidence) in the body of evidence for an outcome.                                                                                                                                                                                | Methods “Step 6” (lines 584-603); Supplementary Information 3.4                                                                                                                                                   |
| <b>RESULTS</b>                |     |                                                                                                                                                                                                                                                                                      |                                                                                                                                                                                                                   |
| Study selection               | 16a | Describe the results of the search and selection process, from the number of records identified in the search to the number of studies included in the review, ideally using a flow diagram.                                                                                         | PRISMA flow diagrams (Supplementary Figures S1-S3)                                                                                                                                                                |
|                               | 16b | Cite studies that might appear to meet the inclusion criteria, but which were excluded, and explain why they were excluded.                                                                                                                                                          | N/A                                                                                                                                                                                                               |
| Study characteristics         | 17  | Cite each included study and present its characteristics.                                                                                                                                                                                                                            | Supplementary Table S4                                                                                                                                                                                            |
| Risk of bias in studies       | 18  | Present assessments of risk of bias for each included study.                                                                                                                                                                                                                         | Supplementary Information 3.3; Table 2                                                                                                                                                                            |
| Results of individual studies | 19  | For all outcomes, present, for each study: (a) summary statistics for each group (where appropriate) and (b) an effect estimate and its precision (e.g. confidence/credible interval), ideally using structured tables or plots.                                                     | Figures 1, 4, 6, 7; Supplementary Table S5                                                                                                                                                                        |
| Results of syntheses          | 20a | For each synthesis, briefly summarise the characteristics and risk of bias among contributing studies.                                                                                                                                                                               | Table 2; Results (lines 130-136, 149-156, 170-180, 203-212, 230-238, 257-262, 275-279)                                                                                                                            |
|                               | 20b | Present results of all statistical syntheses conducted. If meta-analysis was done, present for each the summary estimate and its precision (e.g. confidence/credible interval) and measures of statistical heterogeneity. If comparing groups, describe the direction of the effect. | Table 2; Supplementary Information 3.5; Supplementary Information 4; Results (lines 115-293)                                                                                                                      |
|                               | 20c | Present results of all investigations of possible causes of heterogeneity among study results.                                                                                                                                                                                       | Table 2; Figure 3; Supplementary Information 3.5; Supplementary Information 4                                                                                                                                     |
|                               | 20d | Present results of all sensitivity analyses conducted to assess the robustness of the synthesized results.                                                                                                                                                                           | Figure 3; Supplementary Information 4                                                                                                                                                                             |
| Reporting biases              | 21  | Present assessments of risk of bias due to missing results (arising from reporting biases) for each synthesis assessed.                                                                                                                                                              | Table 2; Supplementary Information 4; Results (lines 115-293)                                                                                                                                                     |
| Certainty of evidence         | 22  | Present assessments of certainty (or confidence) in the body of evidence for each outcome assessed.                                                                                                                                                                                  | Table 2; Results (lines 115-293)                                                                                                                                                                                  |
| <b>DISCUSSION</b>             |     |                                                                                                                                                                                                                                                                                      |                                                                                                                                                                                                                   |
| Discussion                    | 23a | Provide a general interpretation of the results in the context of other evidence.                                                                                                                                                                                                    | Table 1; Discussion (lines 304-306, 316-322, 329-336)                                                                                                                                                             |
|                               | 23b | Discuss any limitations of the evidence included in the review.                                                                                                                                                                                                                      | Table 1; Discussion (lines 360-398)                                                                                                                                                                               |
|                               | 23c | Discuss any limitations of the review processes used.                                                                                                                                                                                                                                | Table 1; Discussion (lines 369-371,385-398)                                                                                                                                                                       |
|                               | 23d | Discuss implications of the results for practice, policy, and future research.                                                                                                                                                                                                       | Table 1; Introduction (lines 106-112); Discussion (lines 337-359, 409-415)                                                                                                                                        |
| <b>OTHER INFORMATION</b>      |     |                                                                                                                                                                                                                                                                                      |                                                                                                                                                                                                                   |
| Registration and protocol     | 24a | Provide registration information for the review, including register name and registration number, or state that the review was not registered.                                                                                                                                       | The entirety of the Global Burden of Diseases, Injuries, and Risk Factors Study has been registered and approved through the UW IRB. The systematic review was not registered separately. Methods (lines 449-451) |
|                               | 24b | Indicate where the review protocol can be accessed, or state that a protocol was not prepared.                                                                                                                                                                                       | Methods (lines 451-452)                                                                                                                                                                                           |
|                               | 24c | Describe and explain any amendments to information provided at registration or in the protocol.                                                                                                                                                                                      | N/A                                                                                                                                                                                                               |
| Support                       | 25  | Describe sources of financial or non-financial support for the review, and the role of the funders or sponsors in the review.                                                                                                                                                        | Acknowledgments                                                                                                                                                                                                   |

|                                                |    |                                                                                                                                                                                                                                            |                                                                            |
|------------------------------------------------|----|--------------------------------------------------------------------------------------------------------------------------------------------------------------------------------------------------------------------------------------------|----------------------------------------------------------------------------|
| Competing interests                            | 26 | Declare any competing interests of review authors.                                                                                                                                                                                         | Competing Interests Statement                                              |
| Availability of data, code and other materials | 27 | Report which of the following are publicly available and where they can be found: template data collection forms; data extracted from included studies; data used for all analyses; analytic code; any other materials used in the review. | Data availability and Code availability statements; Supplementary Table S3 |

Figure S1. PRISMA 2020 flow diagram for chewing tobacco and head and neck cancers

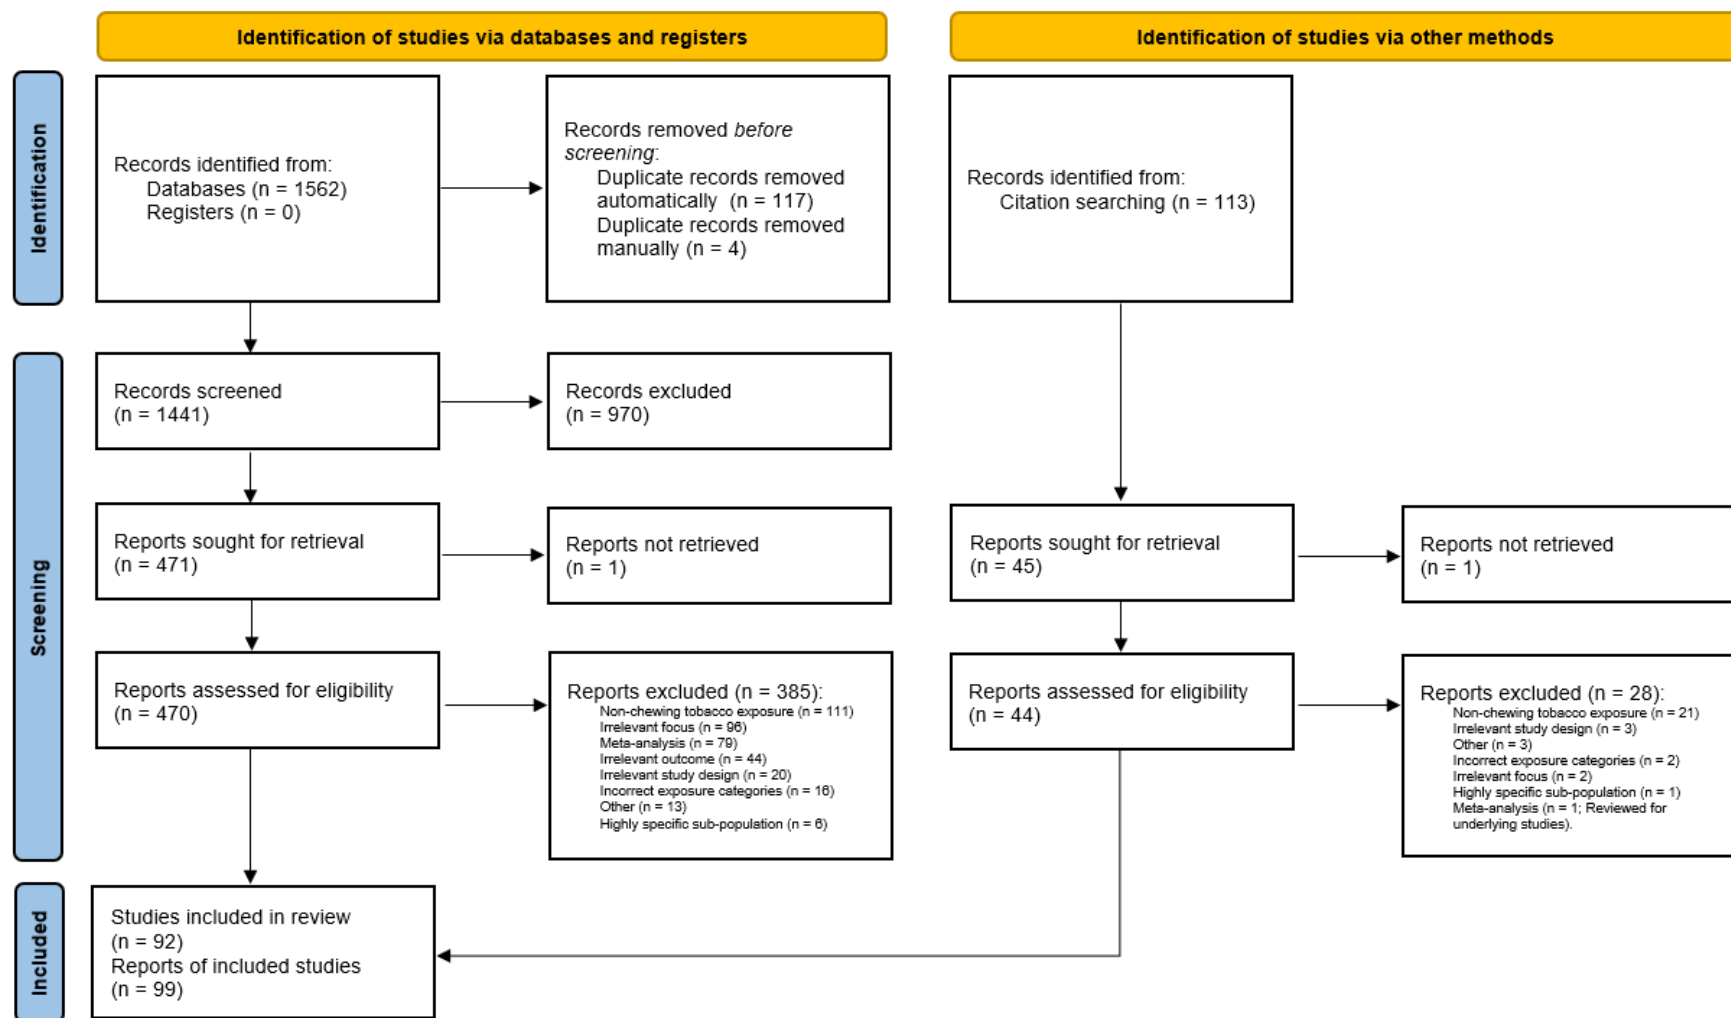

From: Page MJ, McKenzie JE, Bossuyt PM, Boutron I, Hoffmann TC, Mulrow CD, et al. The PRISMA 2020 statement: an updated guideline for reporting systematic reviews. *BMJ* 2021;372:n71. doi: 10.1136/bmj.n71. For more information, visit: <http://www.prisma-statement.org/>

Figure S2. PRISMA 2020 flow diagram for chewing tobacco and ischemic heart disease

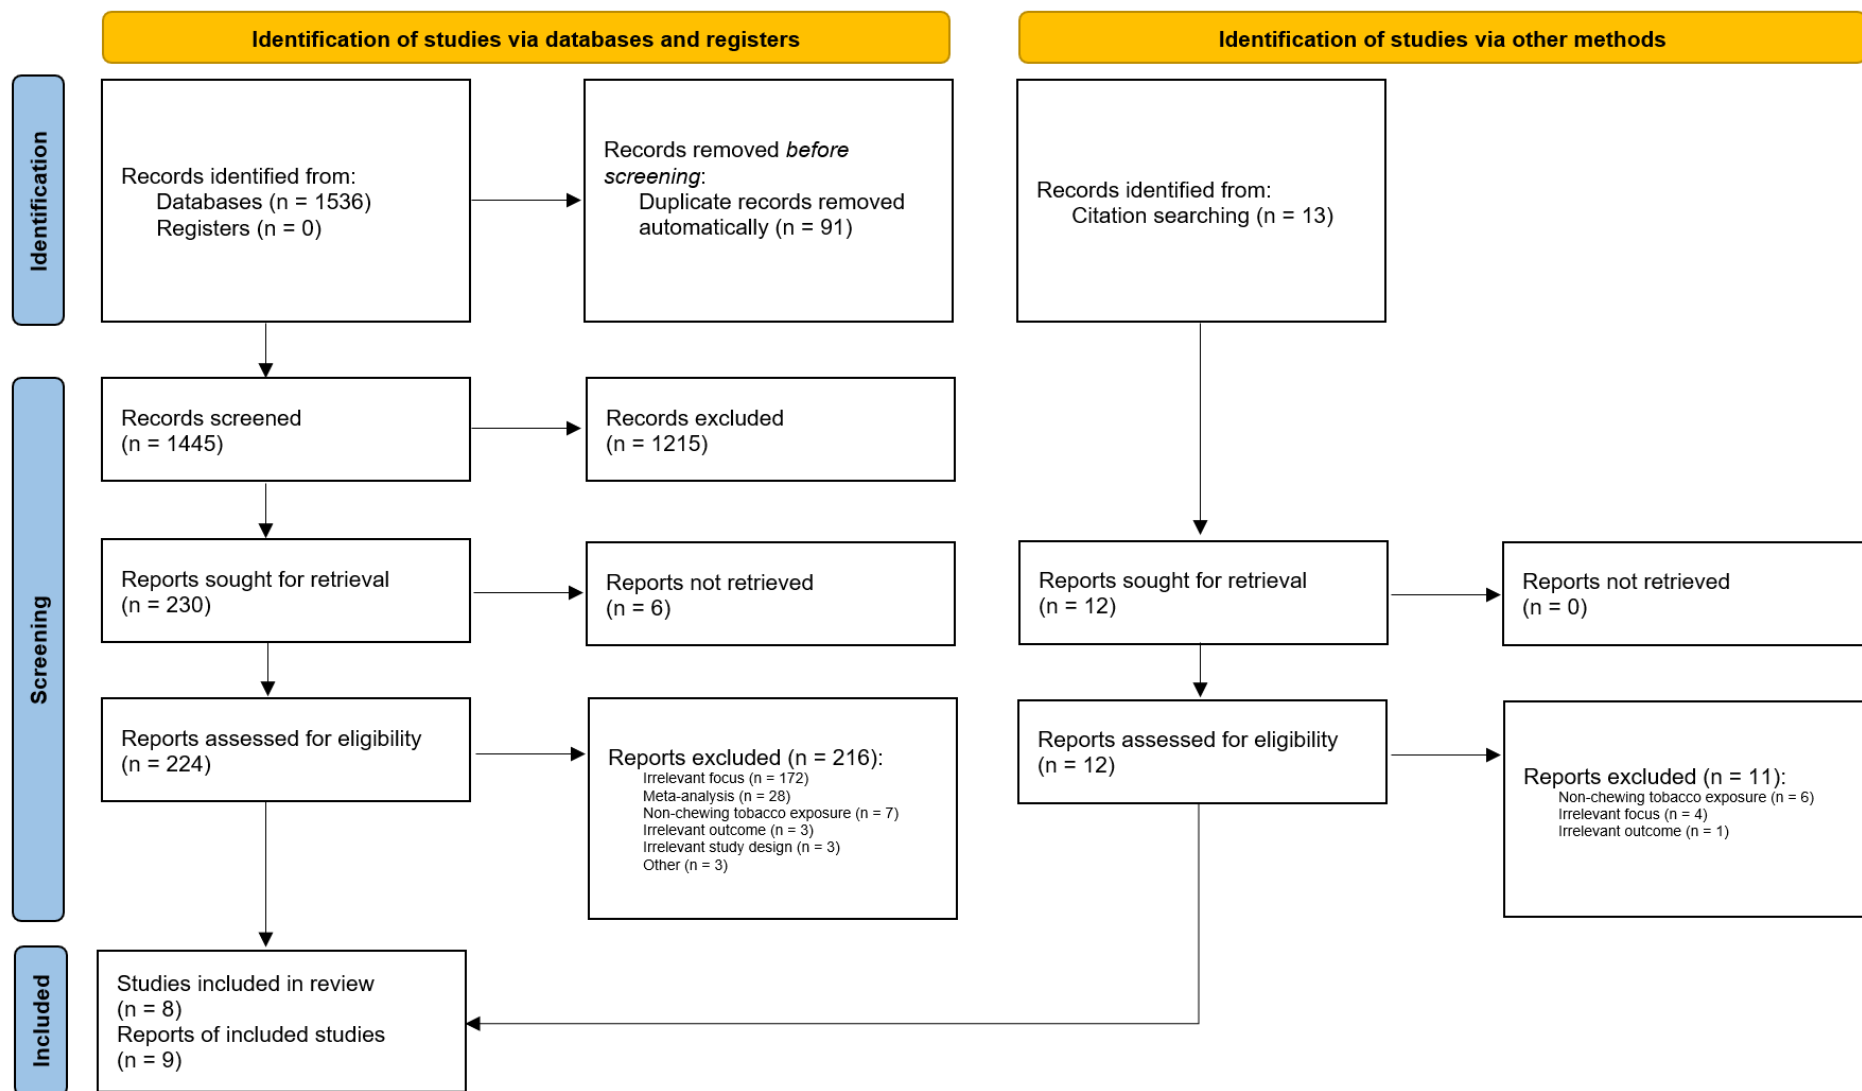

From: Page MJ, McKenzie JE, Bossuyt PM, Boutron I, Hoffmann TC, Mulrow CD, et al. The PRISMA 2020 statement: an updated guideline for reporting systematic reviews. *BMJ* 2021;372:n71. doi: 10.1136/bmj.n71. For more information, visit: <http://www.prisma-statement.org/>

Figure S3. PRISMA 2020 flow diagram for chewing tobacco and stroke

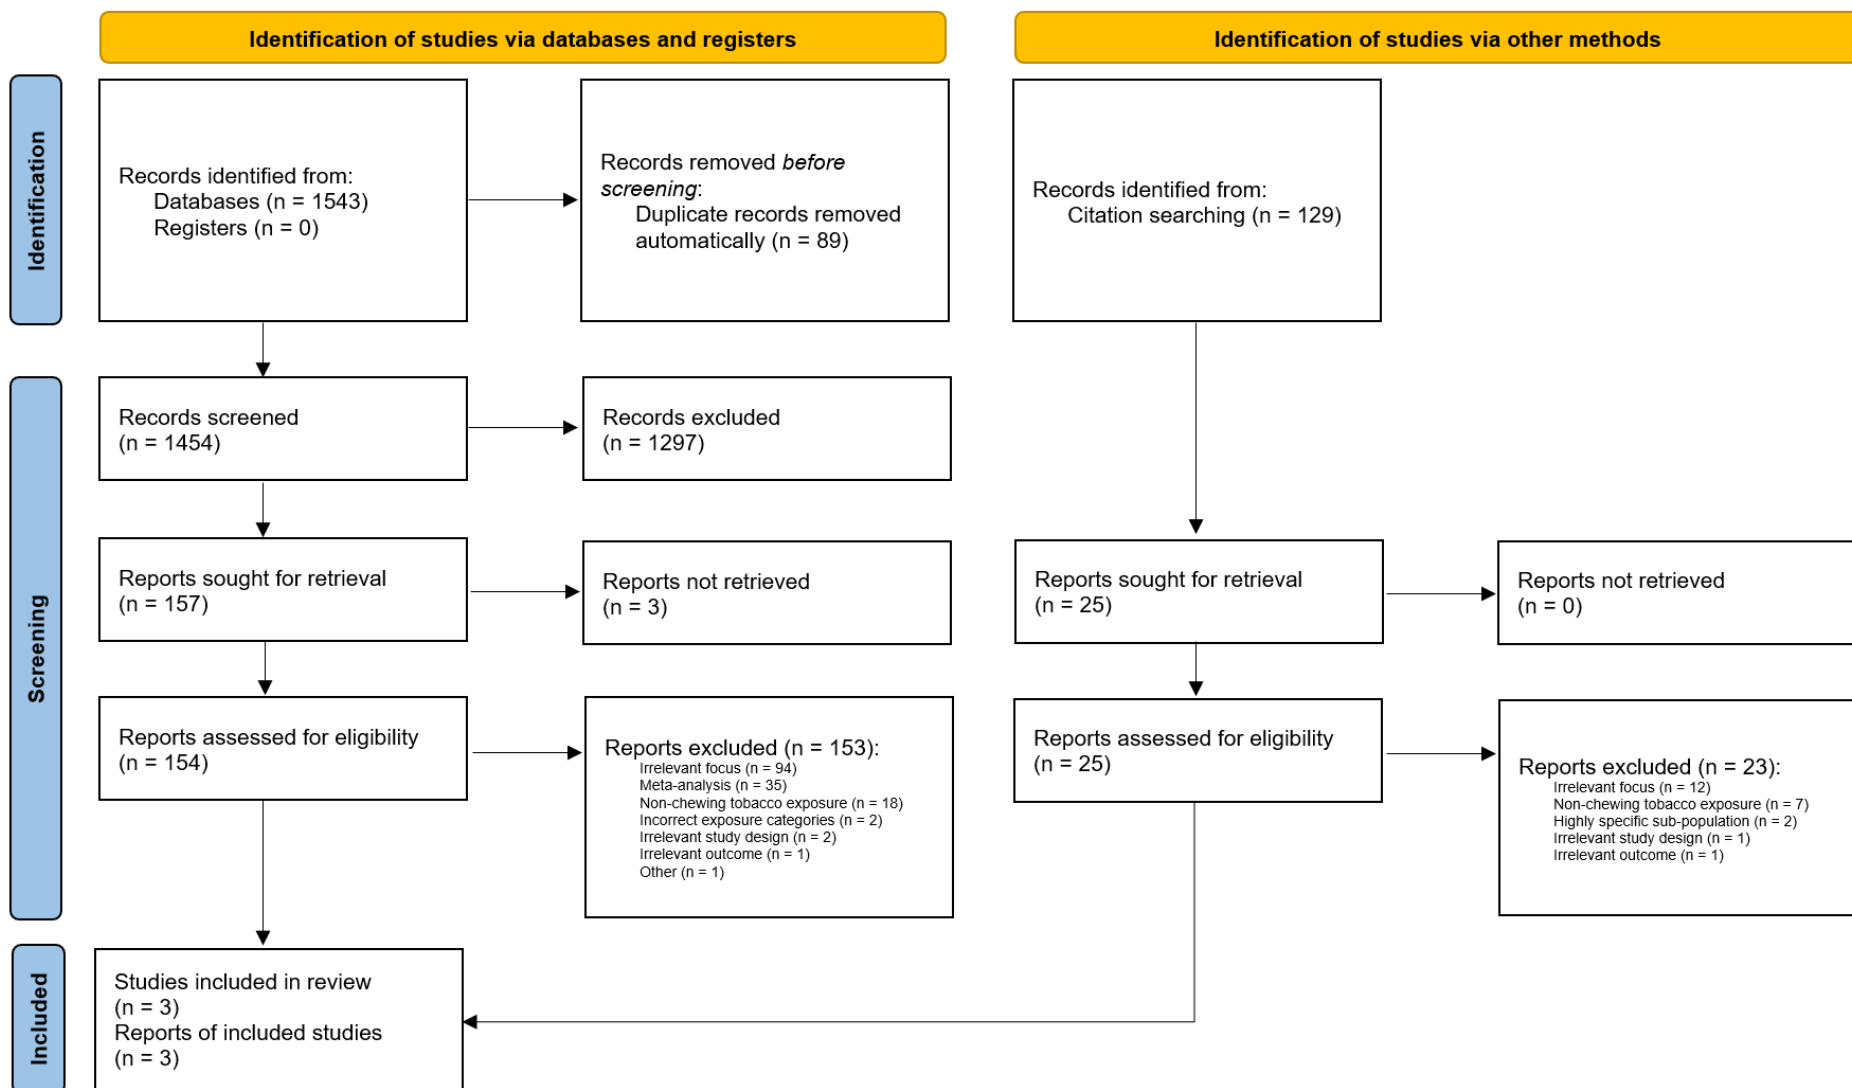

From: Page MJ, McKenzie JE, Bossuyt PM, Boutron I, Hoffmann TC, Mulrow CD, et al. The PRISMA 2020 statement: an updated guideline for reporting systematic reviews. *BMJ* 2021;372:n71. doi: 10.1136/bmj.n71. For more information, visit: <http://www.prisma-statement.org/>



Section 5.2: GATHER

**Table S25: GATHER Checklist**

| Item #                                                                                                | Checklist item                                                                                                                                                                                                                                                                                                                                                                            | Reported on page #                                                               |
|-------------------------------------------------------------------------------------------------------|-------------------------------------------------------------------------------------------------------------------------------------------------------------------------------------------------------------------------------------------------------------------------------------------------------------------------------------------------------------------------------------------|----------------------------------------------------------------------------------|
| <b>Objectives and funding</b>                                                                         |                                                                                                                                                                                                                                                                                                                                                                                           |                                                                                  |
| 1                                                                                                     | Define the indicator(s), populations (including age, sex, and geographic entities), and time period(s) for which estimates were made.                                                                                                                                                                                                                                                     | Methods (p. 14)                                                                  |
| 2                                                                                                     | List the funding sources for the work.                                                                                                                                                                                                                                                                                                                                                    | "Acknowledgements"                                                               |
| <b>Data Inputs</b>                                                                                    |                                                                                                                                                                                                                                                                                                                                                                                           |                                                                                  |
| <i>For all data inputs from multiple sources that are synthesized as part of the study:</i>           |                                                                                                                                                                                                                                                                                                                                                                                           |                                                                                  |
| 3                                                                                                     | Describe how the data were identified and how the data were accessed.                                                                                                                                                                                                                                                                                                                     | Methods (p. 15); SI (p. 3-10, 44-45)                                             |
| 4                                                                                                     | Specify the inclusion and exclusion criteria. Identify all ad-hoc exclusions.                                                                                                                                                                                                                                                                                                             | Methods (p. 15); SI (p. 11)                                                      |
| 5                                                                                                     | Provide information on all included data sources and their main characteristics. For each data source used, report reference information or contact name/institution, population represented, data collection method, year(s) of data collection, sex and age range, diagnostic criteria or measurement method, and sample size, as relevant.                                             | SI (p. 20-36); References                                                        |
| 6                                                                                                     | Identify and describe any categories of input data that have potentially important biases (e.g., based on characteristics listed in item 5).                                                                                                                                                                                                                                              | Methods (p. 16); SI (p. 46-63)                                                   |
| <i>For data inputs that contribute to the analysis but were not synthesized as part of the study:</i> |                                                                                                                                                                                                                                                                                                                                                                                           |                                                                                  |
| 7                                                                                                     | Describe and give sources for any other data inputs.                                                                                                                                                                                                                                                                                                                                      | N/A                                                                              |
| <i>For all data inputs:</i>                                                                           |                                                                                                                                                                                                                                                                                                                                                                                           |                                                                                  |
| 8                                                                                                     | Provide all data inputs in a file format from which data can be efficiently extracted (e.g., a spreadsheet rather than a PDF), including all relevant meta-data listed in item 5. For any data inputs that cannot be shared because of ethical or legal reasons, such as third-party ownership, provide a contact name or the name of the institution that retains the right to the data. | SI (p. 38-44, 79); Data availability statement (p. 18)                           |
| <b>Data analysis</b>                                                                                  |                                                                                                                                                                                                                                                                                                                                                                                           |                                                                                  |
| 9                                                                                                     | Provide a conceptual overview of the data analysis method. A diagram may be helpful.                                                                                                                                                                                                                                                                                                      | Main (p. 4); Methods (p. 13)                                                     |
| 10                                                                                                    | Provide a detailed description of all steps of the analysis, including mathematical formulae. This description should cover, as relevant, data cleaning, data pre-processing, data adjustments and weighting of data sources, and mathematical or statistical model(s).                                                                                                                   | Methods (p. 15-17); SI (p. 37-38, 63-64)                                         |
| 11                                                                                                    | Describe how candidate models were evaluated and how the final model(s) were selected.                                                                                                                                                                                                                                                                                                    | Methods (p. 17-18)                                                               |
| 12                                                                                                    | Provide the results of an evaluation of model performance, if done, as well as the results of any relevant sensitivity analysis.                                                                                                                                                                                                                                                          | Results (p. 5-9); SI (p. 64-78)                                                  |
| 13                                                                                                    | Describe methods for calculating uncertainty of the estimates. State which sources of uncertainty were, and were not, accounted for in the uncertainty analysis.                                                                                                                                                                                                                          | Methods (p. 16-17); SI (p. 64)                                                   |
| 14                                                                                                    | State how analytic or statistical source code used to generate estimates can be accessed.                                                                                                                                                                                                                                                                                                 | Code availability statement (p. 18)                                              |
| <b>Results and Discussion</b>                                                                         |                                                                                                                                                                                                                                                                                                                                                                                           |                                                                                  |
| 15                                                                                                    | Provide published estimates in a file format from which data can be efficiently extracted.                                                                                                                                                                                                                                                                                                | Table 2; Burden of Proof visualization tool (URL to be provided at resubmission) |
| 16                                                                                                    | Report a quantitative measure of the uncertainty of the estimates (e.g. uncertainty intervals).                                                                                                                                                                                                                                                                                           | Table 2; Results (p. 5-9)                                                        |
| 17                                                                                                    | Interpret results in light of existing evidence. If updating a previous set of estimates, describe the reasons for changes in estimates.                                                                                                                                                                                                                                                  | Discussion (p. 10-11)                                                            |
| 18                                                                                                    | Discuss limitations of the estimates. Include a discussion of any modelling assumptions or data limitations that affect interpretation of the estimates.                                                                                                                                                                                                                                  | Table 1; Discussion (p. 12)                                                      |

## Section 6: Supplementary References

The references for underlying studies and literature cited in the main text are provided in the main manuscript. These references refer specifically to those that were cited in the methodology descriptions provided in this document, the Supplementary Information. They are all also cited in the main manuscript for proper reference.

1. Vos, T. *et al.* Global burden of 369 diseases and injuries in 204 countries and territories, 1990–2019: a systematic analysis for the Global Burden of Disease Study 2019. *The Lancet* **396**, 1204–1222 (2020).
2. Kendrick, P. J. *et al.* Spatial, temporal, and demographic patterns in prevalence of chewing tobacco use in 204 countries and territories, 1990–2019: a systematic analysis from the Global Burden of Disease Study 2019. *The Lancet Public Health* **6**, e482–e499 (2021).
3. Covidence - Better systematic review management. *Covidence* <https://www.covidence.org/>.
4. Aravkin, A. Y. *et al.* Reply to: Concerns about the Burden of Proof studies. *Nat Med* 1–2 (2023) doi:10.1038/s41591-023-02295-7.
5. Dai, X. *et al.* Health effects associated with smoking: a Burden of Proof study. *Nat Med* **28**, 2045–2055 (2022).
6. Lescinsky, H. *et al.* Health effects associated with consumption of unprocessed red meat: a Burden of Proof study. *Nat Med* **28**, 2075–2082 (2022).
7. Razo, C. *et al.* Effects of elevated systolic blood pressure on ischemic heart disease: a Burden of Proof study. *Nat Med* **28**, 2056–2065 (2022).
8. Stanaway, J. D. *et al.* Health effects associated with vegetable consumption: a Burden of Proof study. *Nat Med* **28**, 2066–2074 (2022).
9. Zheng, P. *et al.* The Burden of Proof studies: assessing the evidence of risk. *Nat Med* **28**, 2038–2044 (2022).

10. Boffetta P, Aagnes B, Weiderpass E, & Andersen A. Smokeless tobacco use and risk of cancer of the pancreas and other organs. *Int J Cancer* **114**, 992–5 (2005).
